# Supplementary material for: Studies on highly regio- and stereoselective hydration of 1,2-allenylic sulfoxides
Source: Royal Society of Chemistry journal article supplement (doi:10.1039/c0ob00007h), 2010-01-01

# Studies on Highly Regio- and Stereoselective Hydration of 1,2-Allenyllic Sulfoxides

Zhao Fang, Chao Zhou, Chunling Fu\*, and Shengming Ma\*

*Laboratory of Molecular Recognition and Synthesis, Department of Chemistry,  
Zhejiang University, Hangzhou 310027, Zhejiang, People's Republic of China*

*masm@sioc.ac.cn*

|                                                                           |        |
|---------------------------------------------------------------------------|--------|
| General experimental methods                                              | S2     |
| <sup>1</sup> H NMR, <sup>13</sup> C NMR, and HPLC spectra of the products | S2-S85 |

**General experimental methods:**

$^1\text{H}$  and  $^{13}\text{C}$  nuclear magnetic resonance spectra were recorded on an instrument operated at 300 MHz for  $^1\text{H}$  NMR and 75 MHz for  $^{13}\text{C}$  NMR. Deuteriochloroform ( $\text{CDCl}_3$ ) was used as solvent in all NMR experiments. Chemical shifts ( $\delta$ ) are given in parts per million (ppm). Infrared spectra were recorded on a FT-IR spectrometer. Mass spectra were carried out in EI mode. HRMS spectra were carried out in EI mode. Thin layer chromatography was performed on pre-coated glassback plates and visualized with UV light at 254 nm. Flash column chromatography was performed on silica gel.

$^1\text{H}$  NMR,  $^{13}\text{C}$  NMR, and HPLC Spectra of the Products

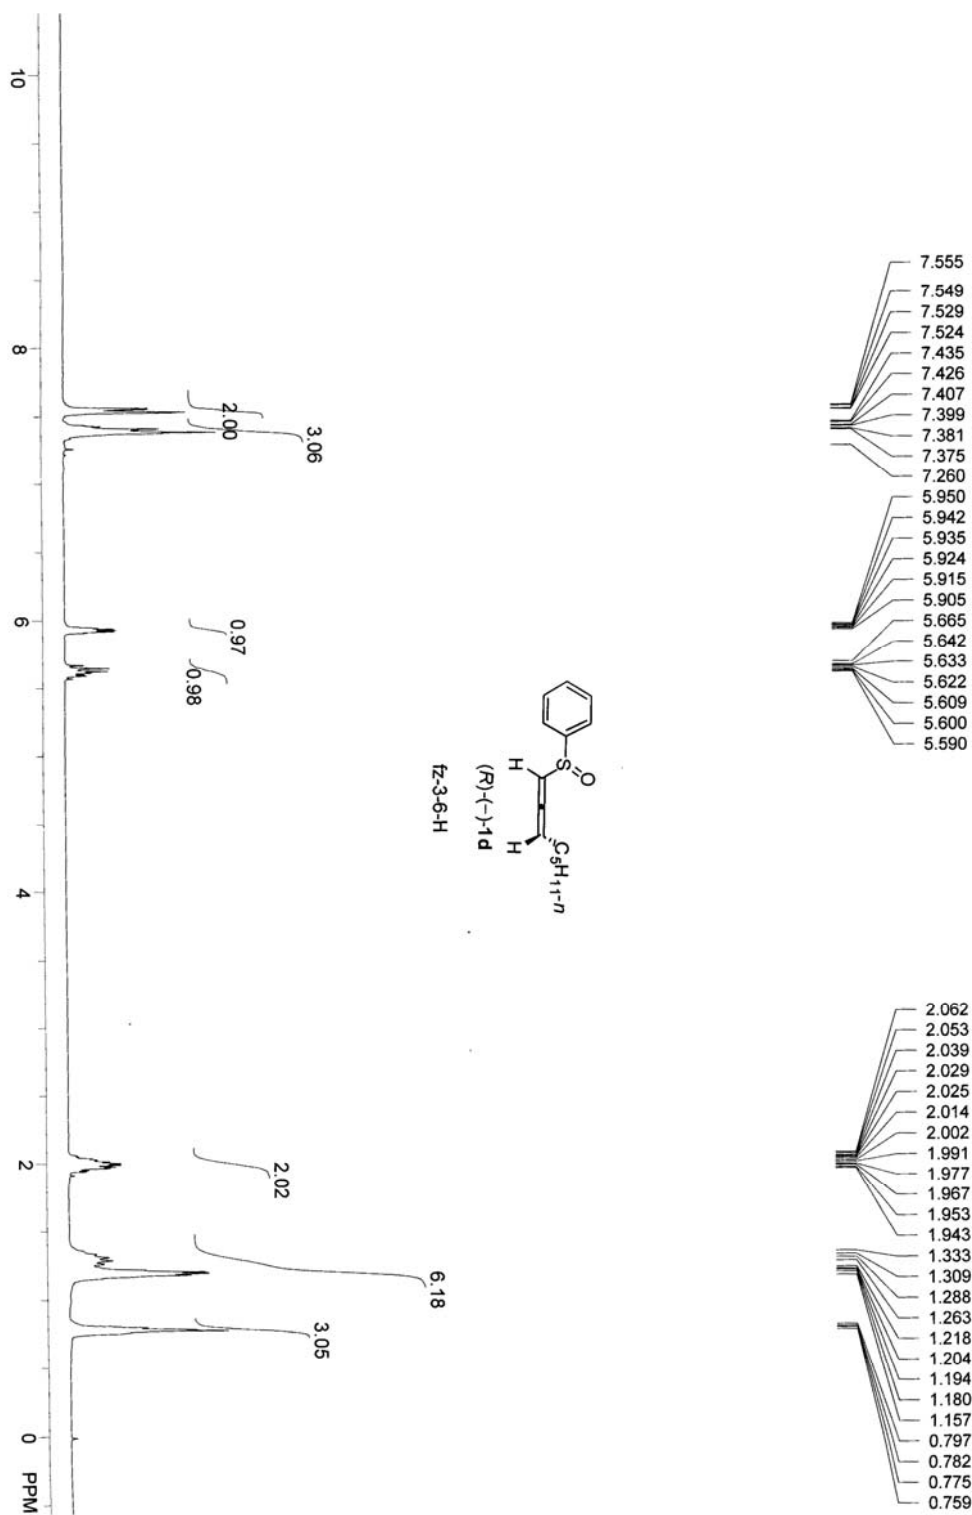

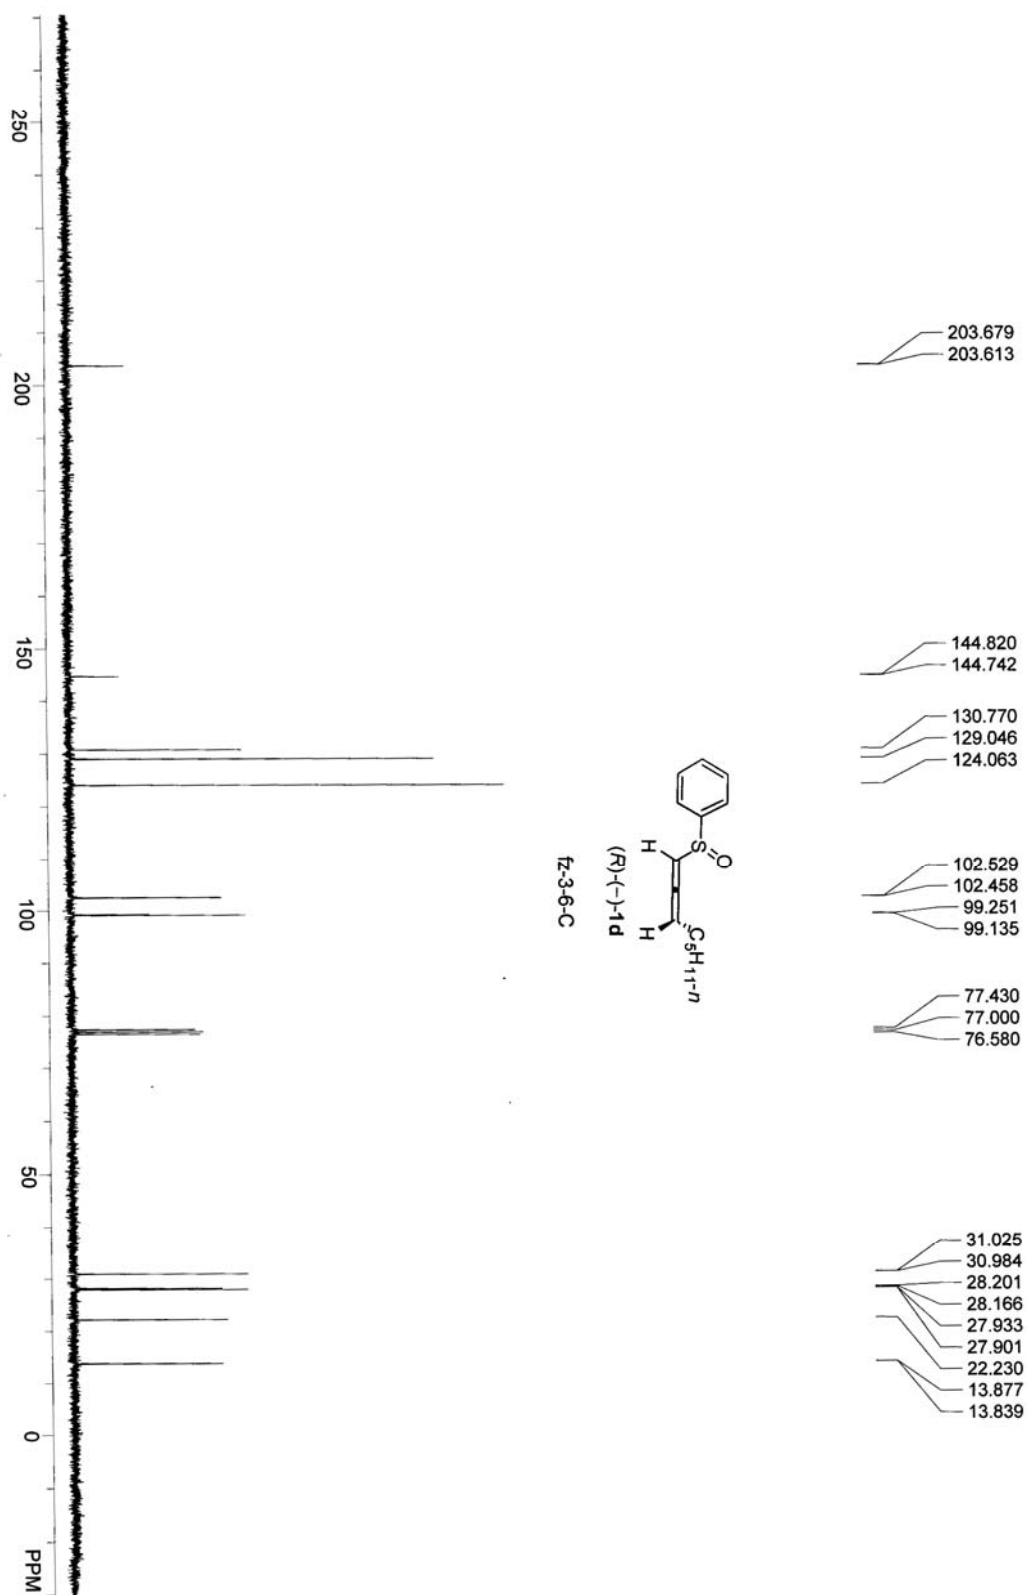

Data File E:\DATA\FZ\FZ000059.D

Sample Name: fz-4-2

chiral OD-H; n-Hexane:i-PrOH=95/5; 254 nm; 0.7 ml/min

=====  
Injection Date : 10/8/2008 3:40:14 PM  
Sample Name : fz-4-29 Location : -  
Acq. Operator : fz  
Acq. Method : D:\HPCHEM\1\METHODS\ERIC.M  
Last changed : 10/8/2008 2:03:11 PM by xfx  
(modified after loading)  
Analysis Method : D:\HPCHEM\1\METHODS\XFX\_LC.M  
Last changed : 12/18/2008 8:41:29 PM by liu

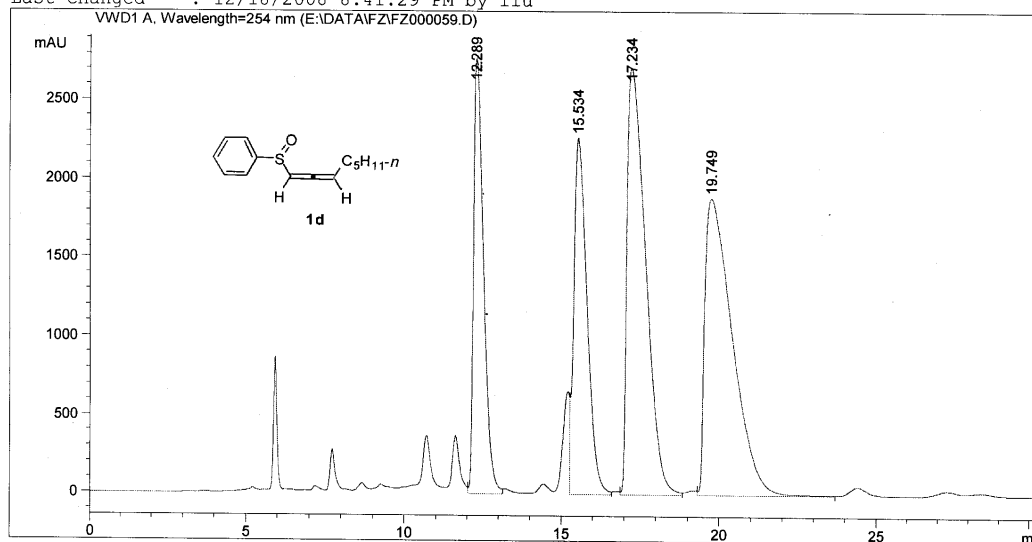

=====  
Area Percent Report  
=====

Sorted By : Signal  
Multiplier : 1.0000  
Dilution : 1.0000  
Sample Amount : 1.00000 [ng/ul] (not used in calc.)  
Use Multiplier & Dilution Factor with ISTDs

Signal 1: VWD1 A, Wavelength=254 nm

| Peak # | RetTime [min] | Type | Width [min] | Area mAU *s | Height [mAU] | Area %  |
|--------|---------------|------|-------------|-------------|--------------|---------|
| 1      | 12.289        | VV   | 0.3407      | 6.12913e4   | 2774.19287   | 17.4190 |
| 2      | 15.534        | VV   | 0.4429      | 6.59609e4   | 2266.53833   | 18.7461 |
| 3      | 17.234        | VV   | 0.6518      | 1.10733e5   | 2708.01636   | 31.4702 |
| 4      | 19.749        | VV   | 0.9458      | 1.13880e5   | 1887.07410   | 32.3648 |

Totals : 3.51865e5 9635.82166

Results obtained with enhanced integrator!

\*\*\* End of Report \*\*\*

Instrument 1 12/20/2008 2:01:21 PM fz  
PDF "pdfFactory Pro" "www.fineprint.com.cn"

Page 1 of 1

Data File E:\DATA\FZ\FZ000060.D

Sample Name: fz-3-

chiral OD-H; n-Hexane:i-PrOH=95/5; 254 nm; 0.7 ml/min

=====  
Injection Date : 10/8/2008 4:13:10 PM  
Sample Name : fz-3-6 Location : -  
Acq. Operator : fz  
Acq. Method : D:\HPCHEM\1\METHODS\ERIC.M  
Last changed : 10/8/2008 2:03:11 PM by xfx  
(modified after loading)  
Analysis Method : D:\HPCHEM\1\METHODS\XFX\_LC.M  
Last changed : 12/18/2008 8:41:29 PM by liu  
=====

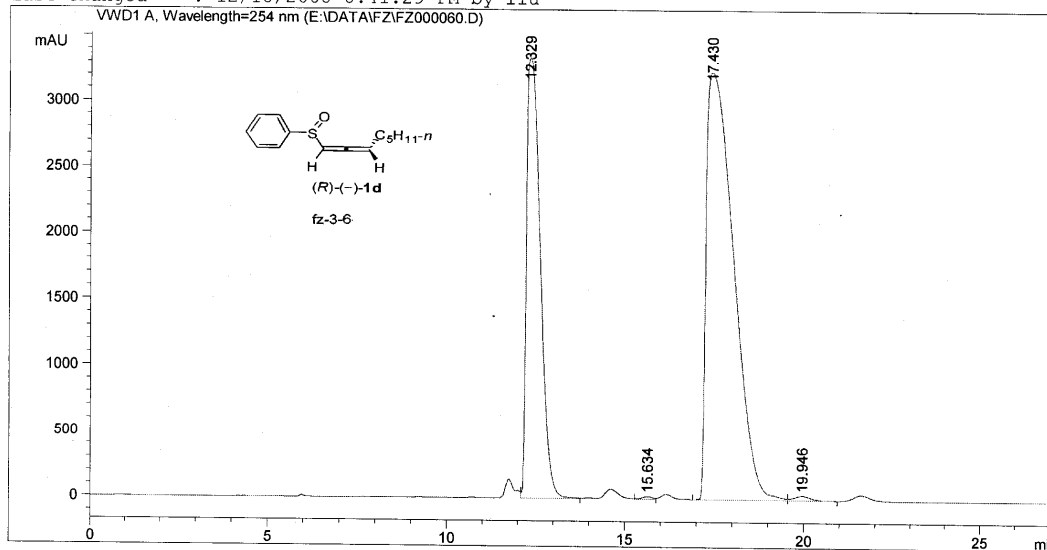

=====  
Area Percent Report  
=====

Sorted By : Signal  
Multiplier : 1.0000  
Dilution : 1.0000  
Sample Amount : 1.00000 [ng/ul] (not used in calc.)  
Use Multiplier & Dilution Factor with ISTDs

Signal 1: VWD1 A, Wavelength=254 nm

| Peak # | RetTime [min] | Type | Width [min] | Area mAU   | Height [mAU] | Area %  |
|--------|---------------|------|-------------|------------|--------------|---------|
| 1      | 12.329        | VV   | 0.4244      | 9.00749e4  | 3349.48584   | 34.1788 |
| 2      | 15.634        | VV   | 0.3485      | 547.90356  | 23.68358     | 0.2079  |
| 3      | 17.430        | VV   | 0.8330      | 1.71521e5  | 3240.49878   | 65.0836 |
| 4      | 19.946        | VV   | 0.5656      | 1395.75476 | 36.97234     | 0.5296  |

Totals : 2.63540e5 6650.64054

Results obtained with enhanced integrator!

\*\*\* End of Report \*\*\*

Instrument 1 12/20/2008 2:00:35 PM fz  
PDF "pdfFactory Pro" www.fineprint.com.cn

$$dr = \frac{(65.0836 + 0.5296)}{(34.1788 + 0.2079)} = \frac{65.6132}{34.3867} = 1.91$$

$$ee\% = \frac{34.1788 + 65.0836}{-0.5296 - 0.2079} = 98.59\%$$

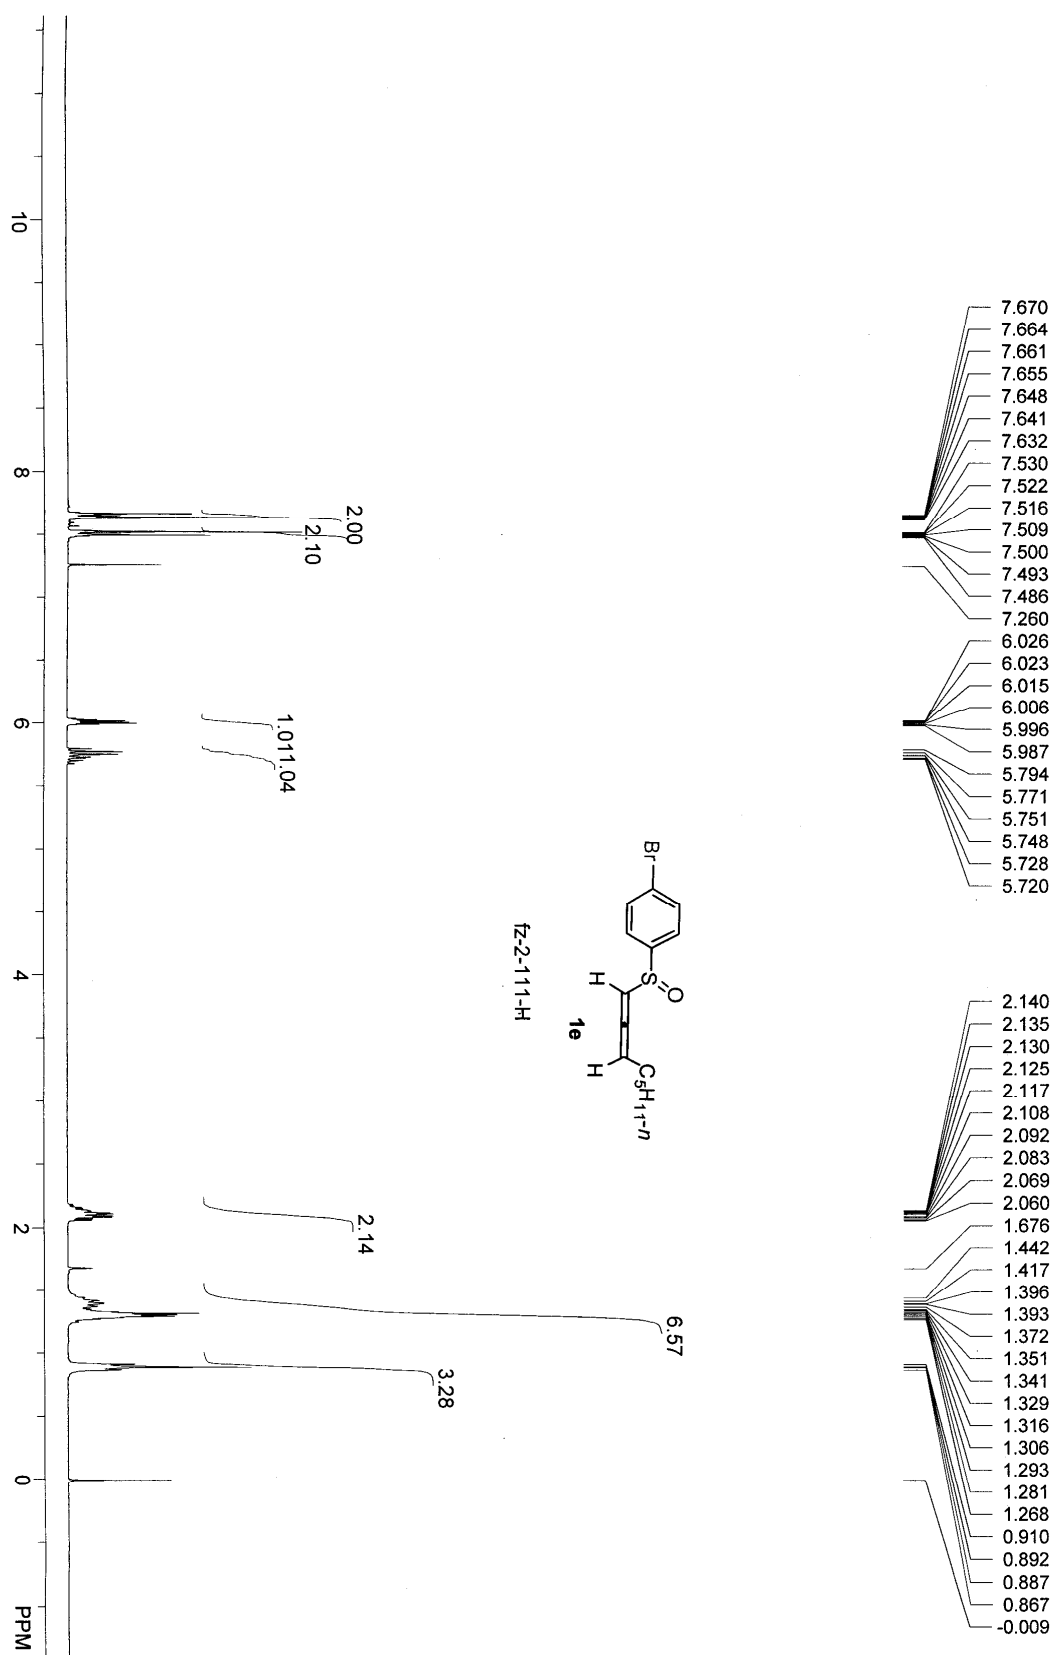

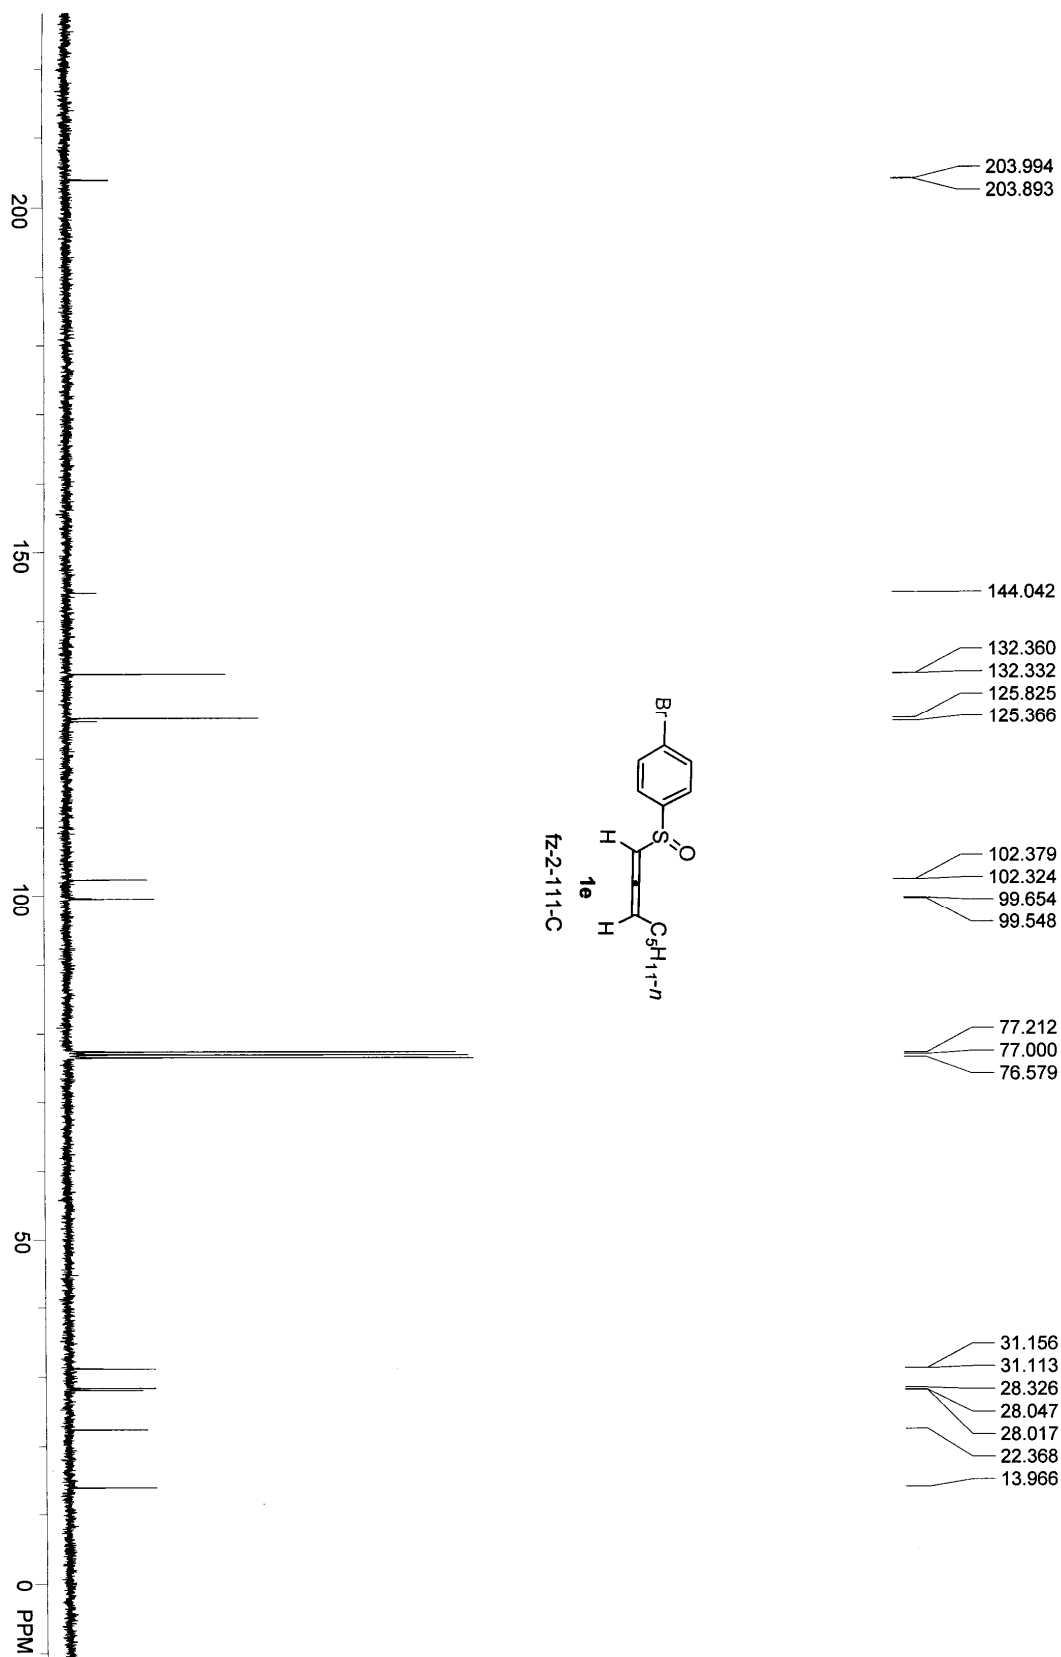



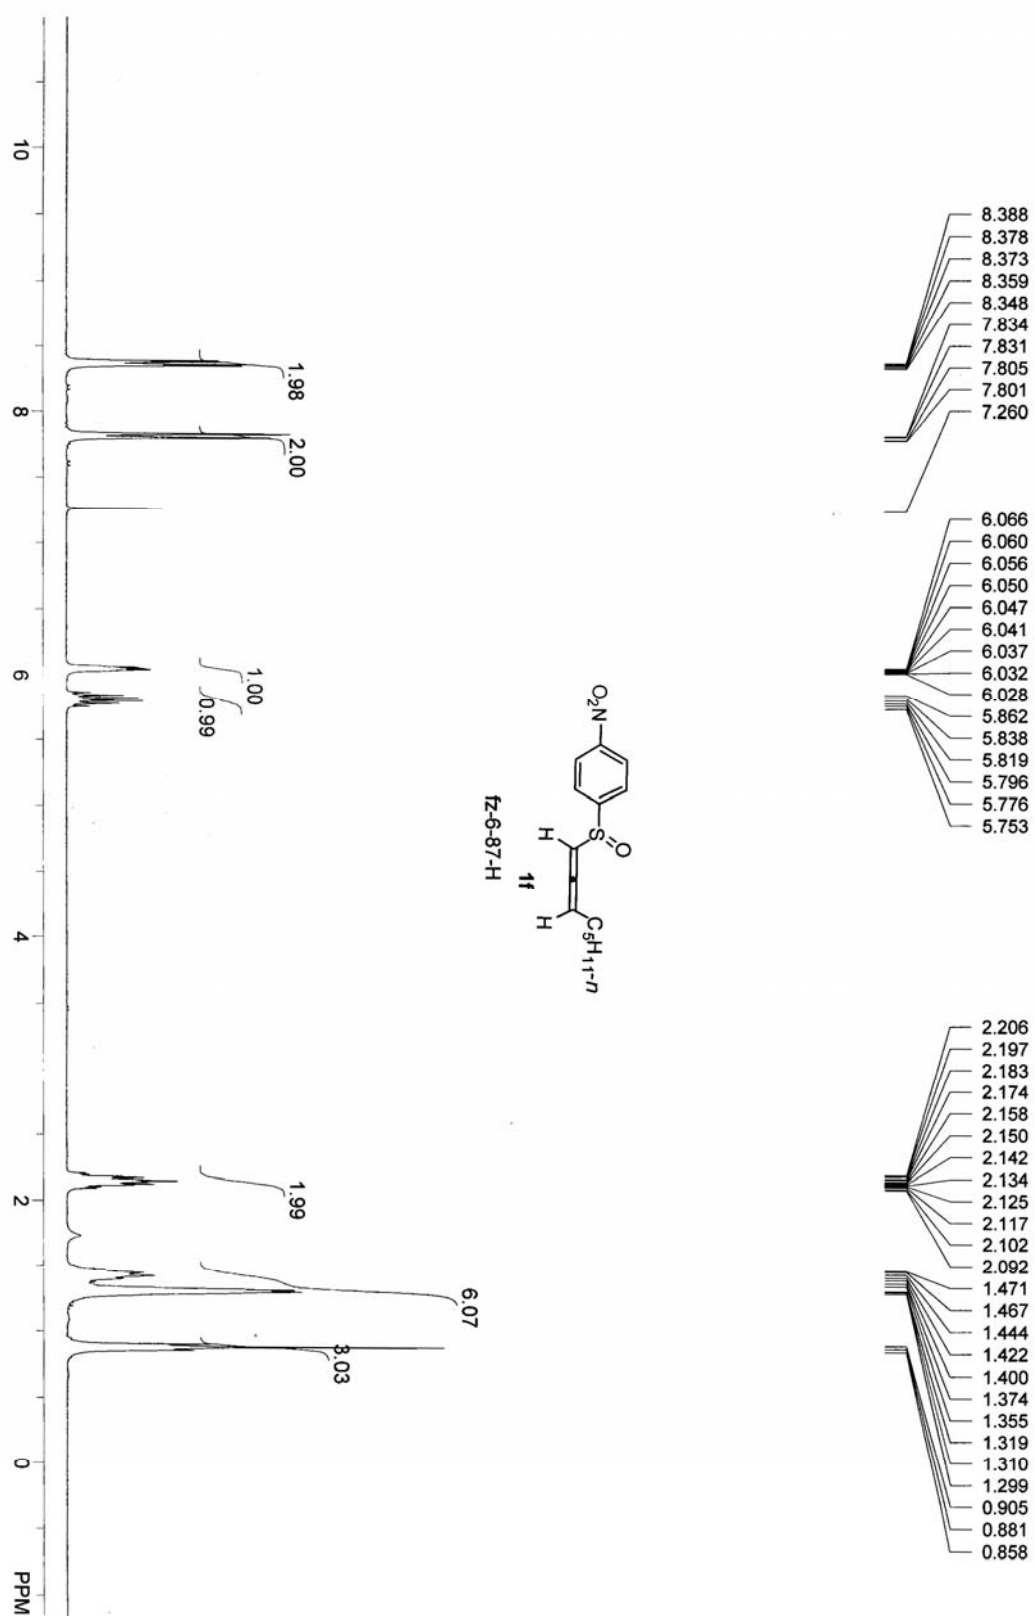

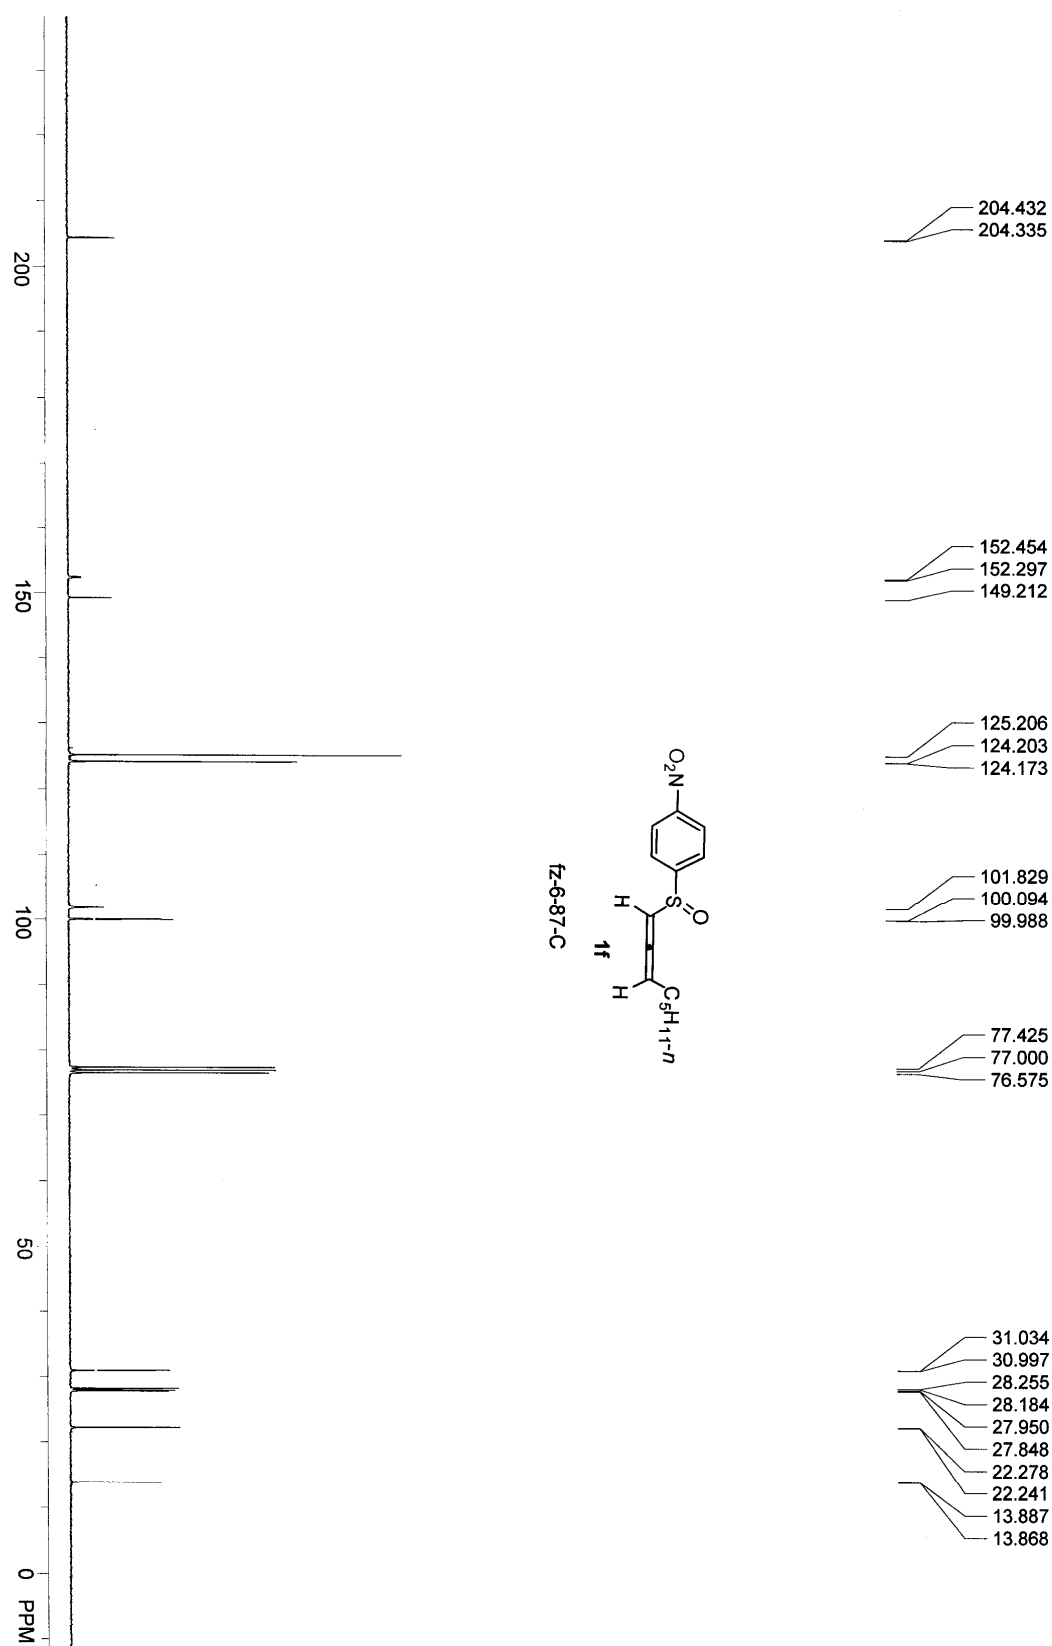

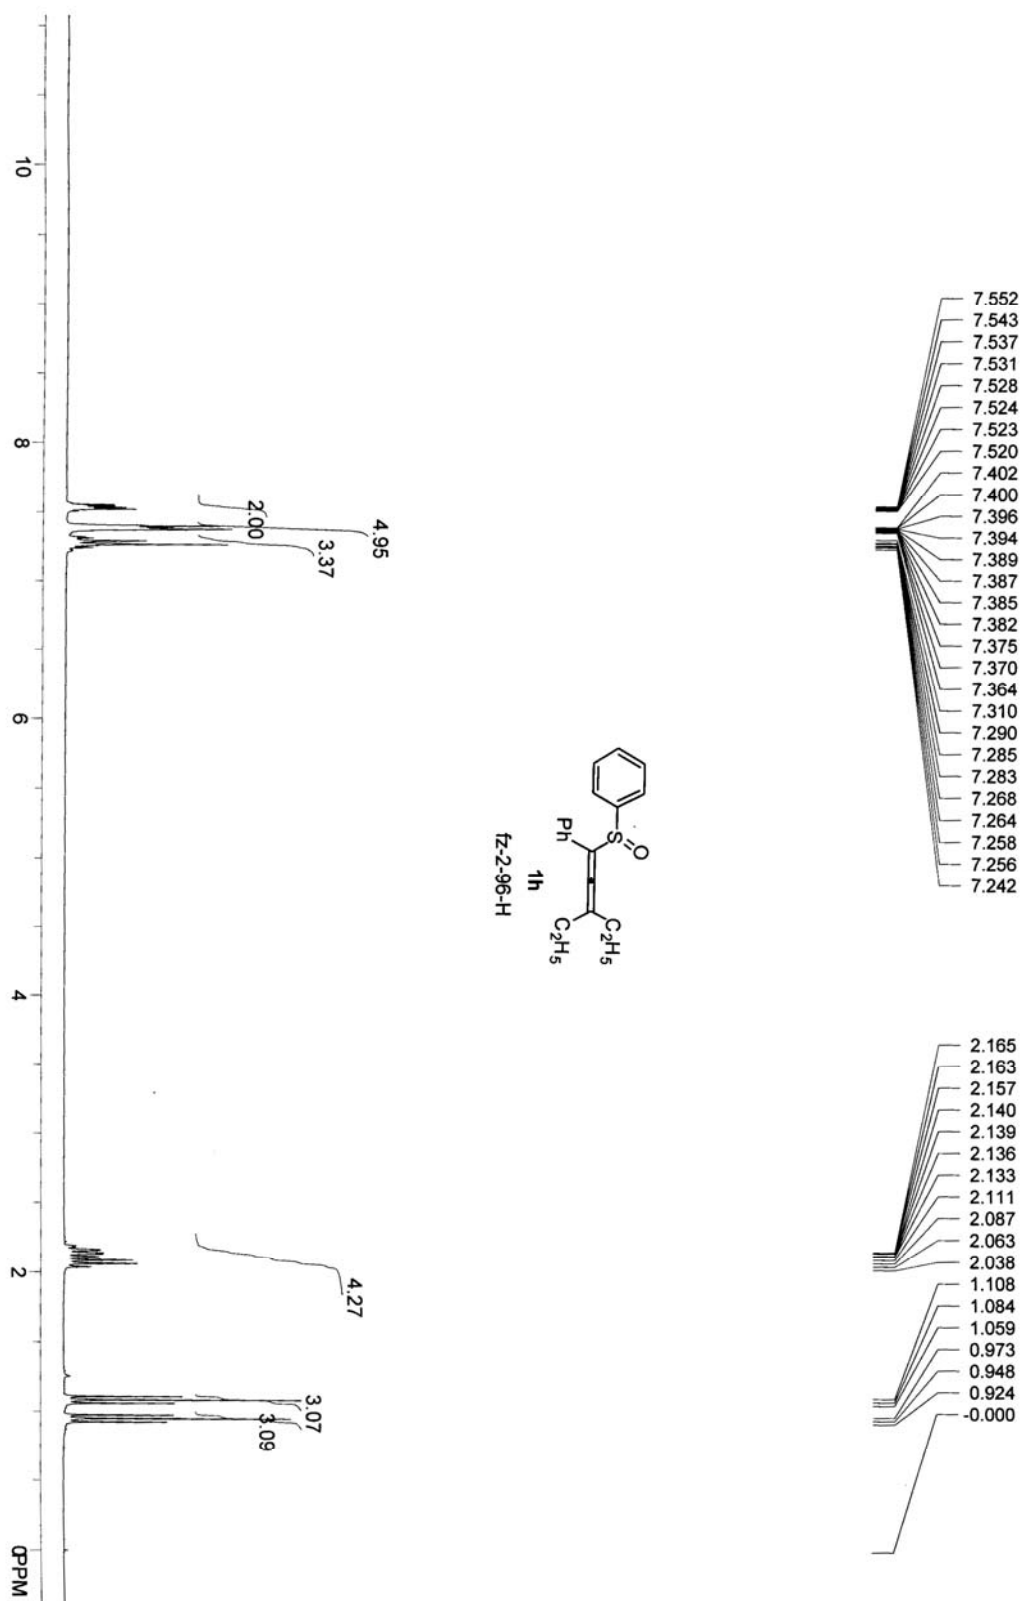

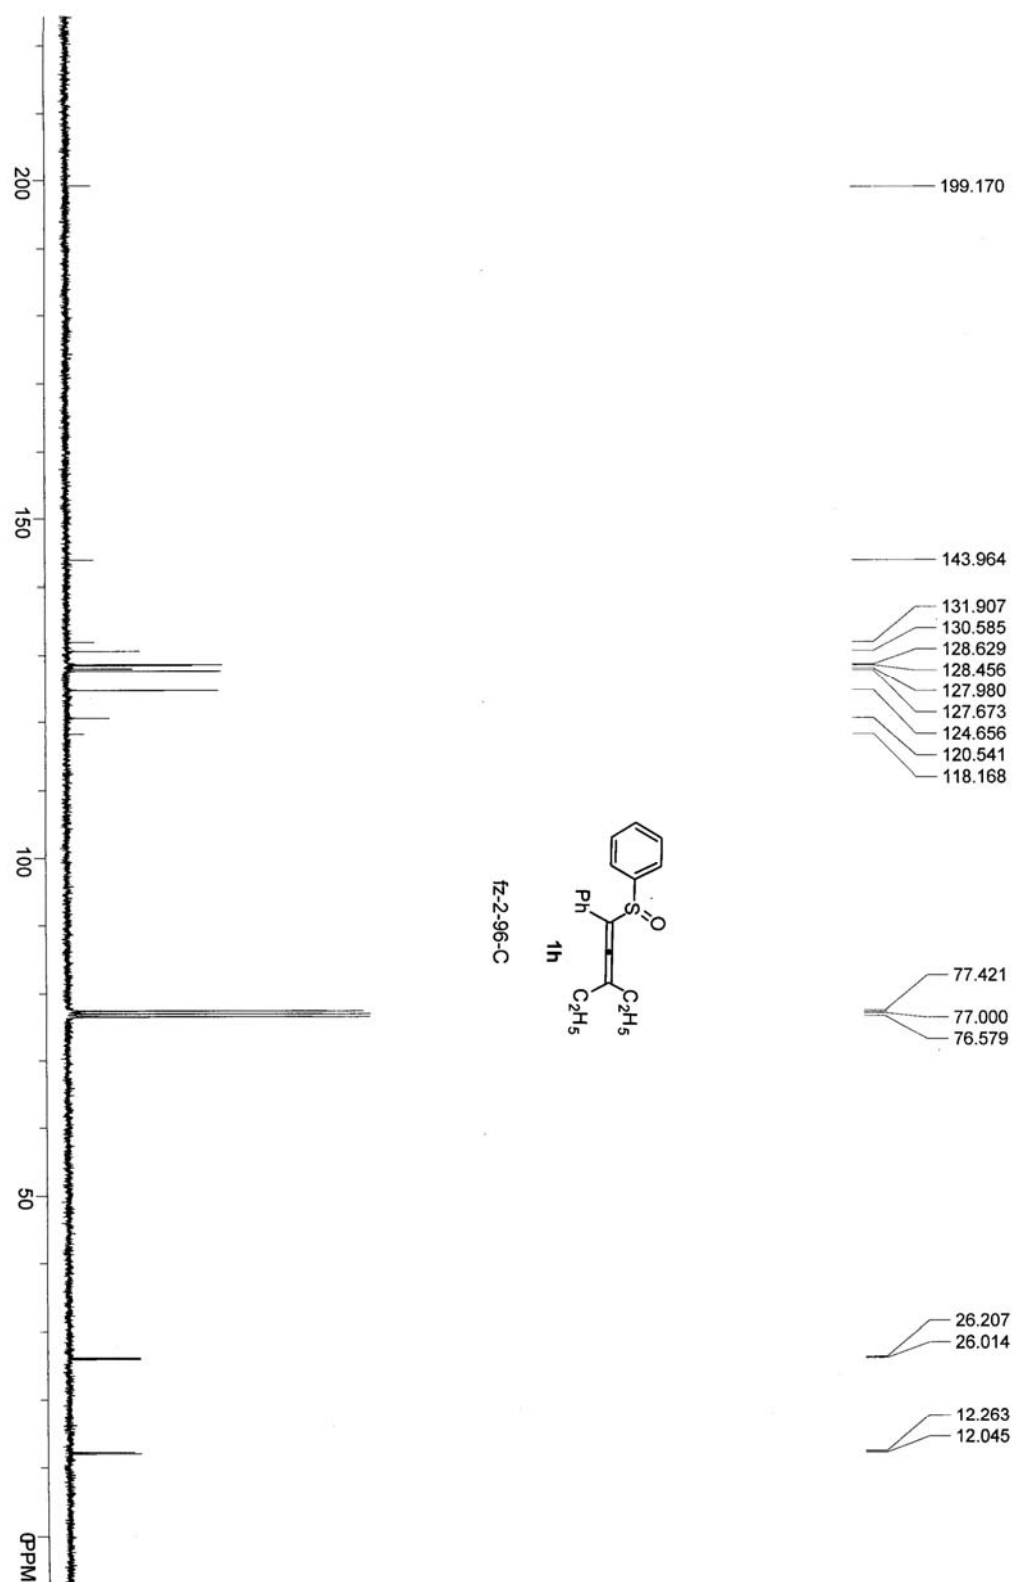

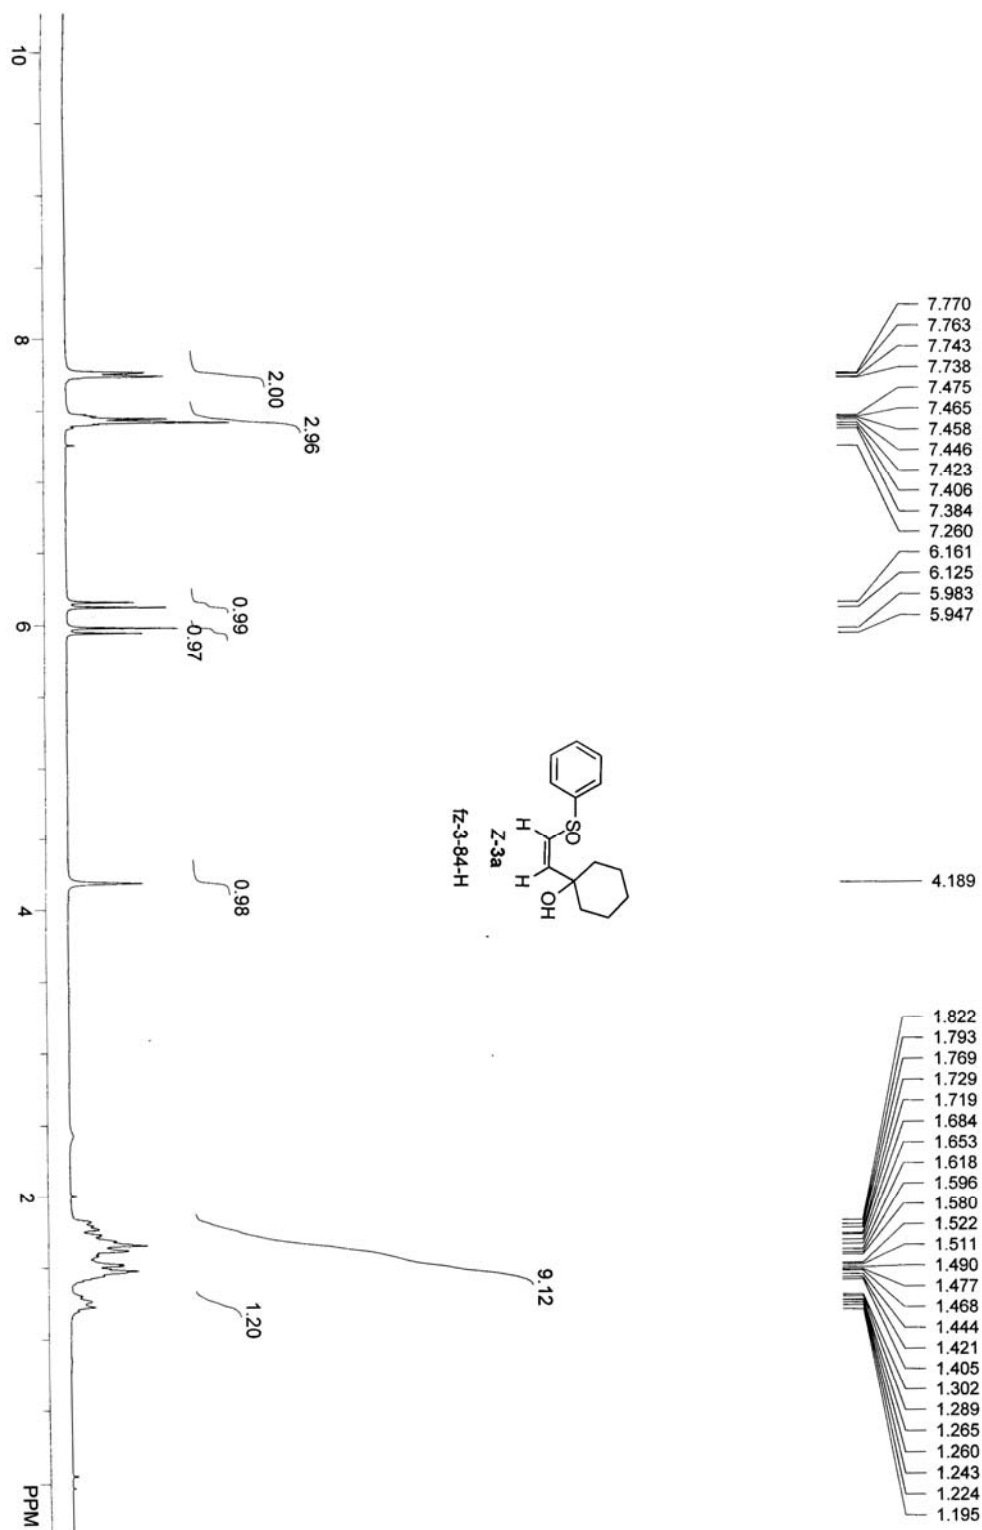

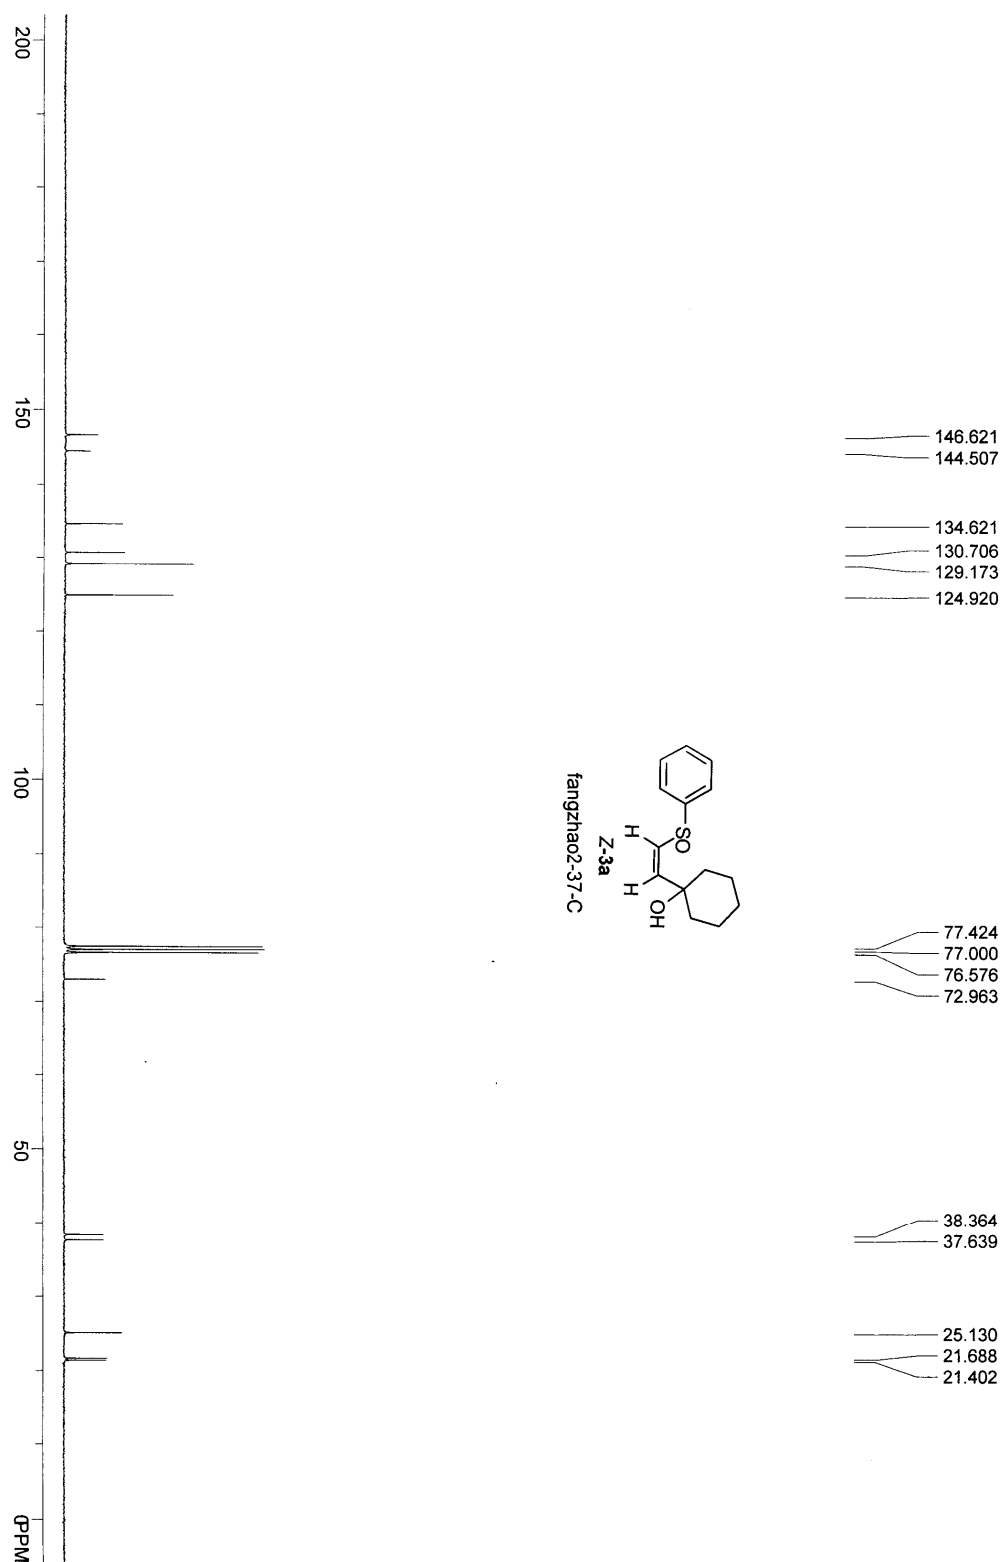

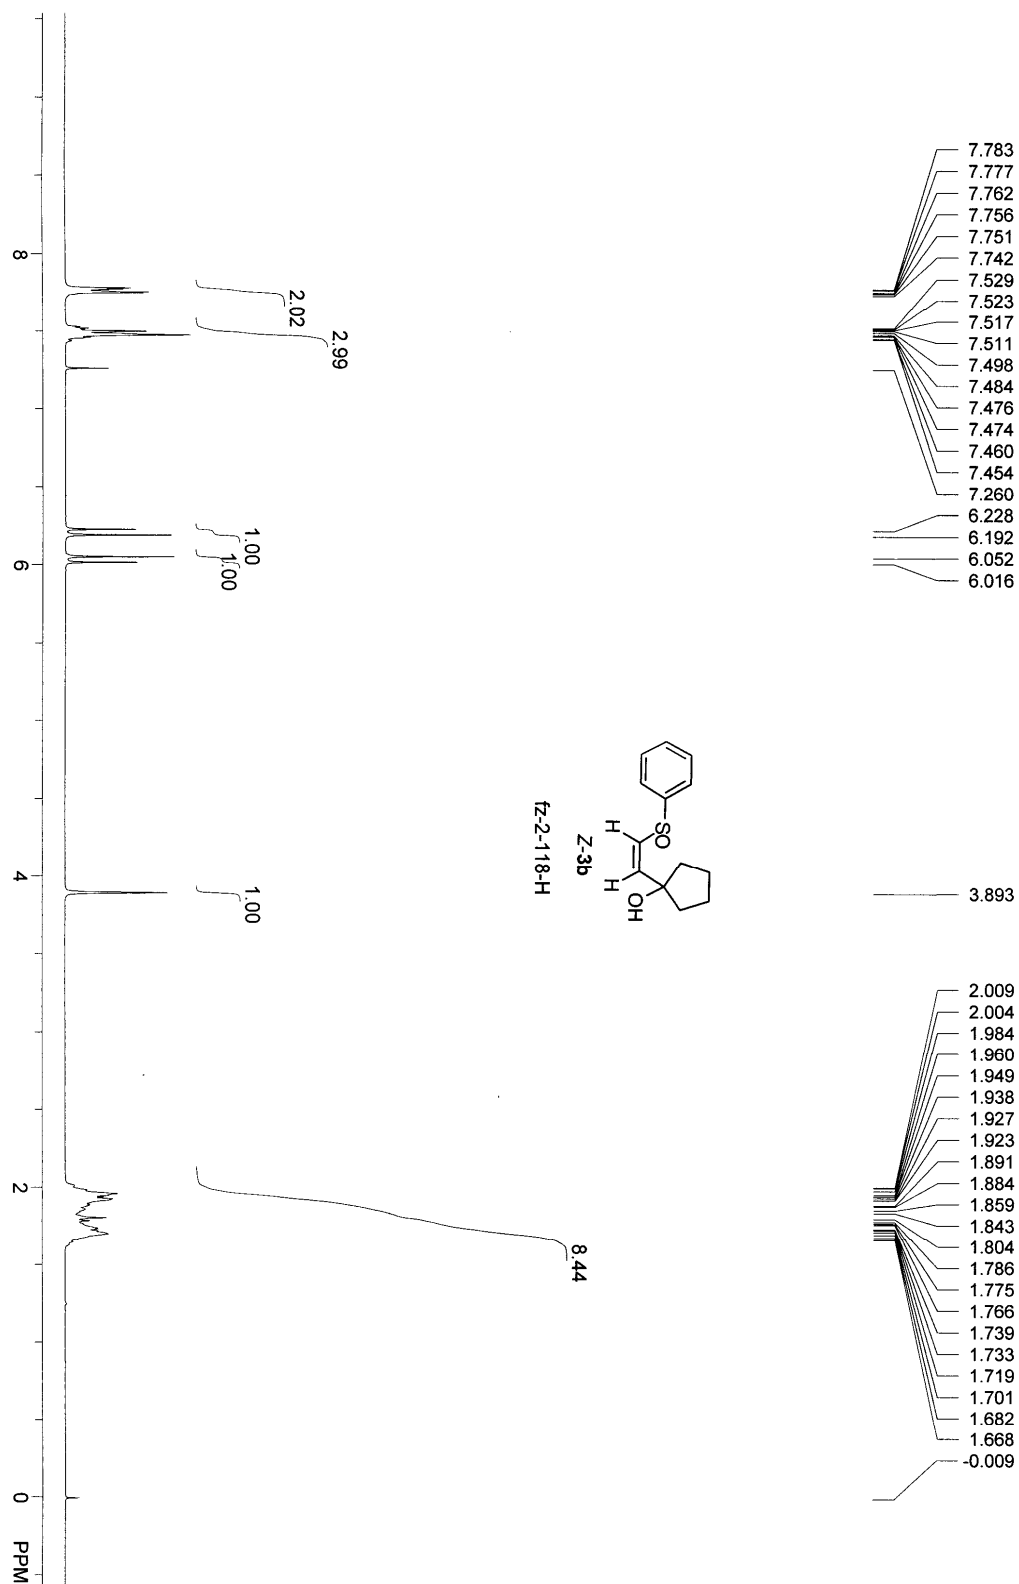

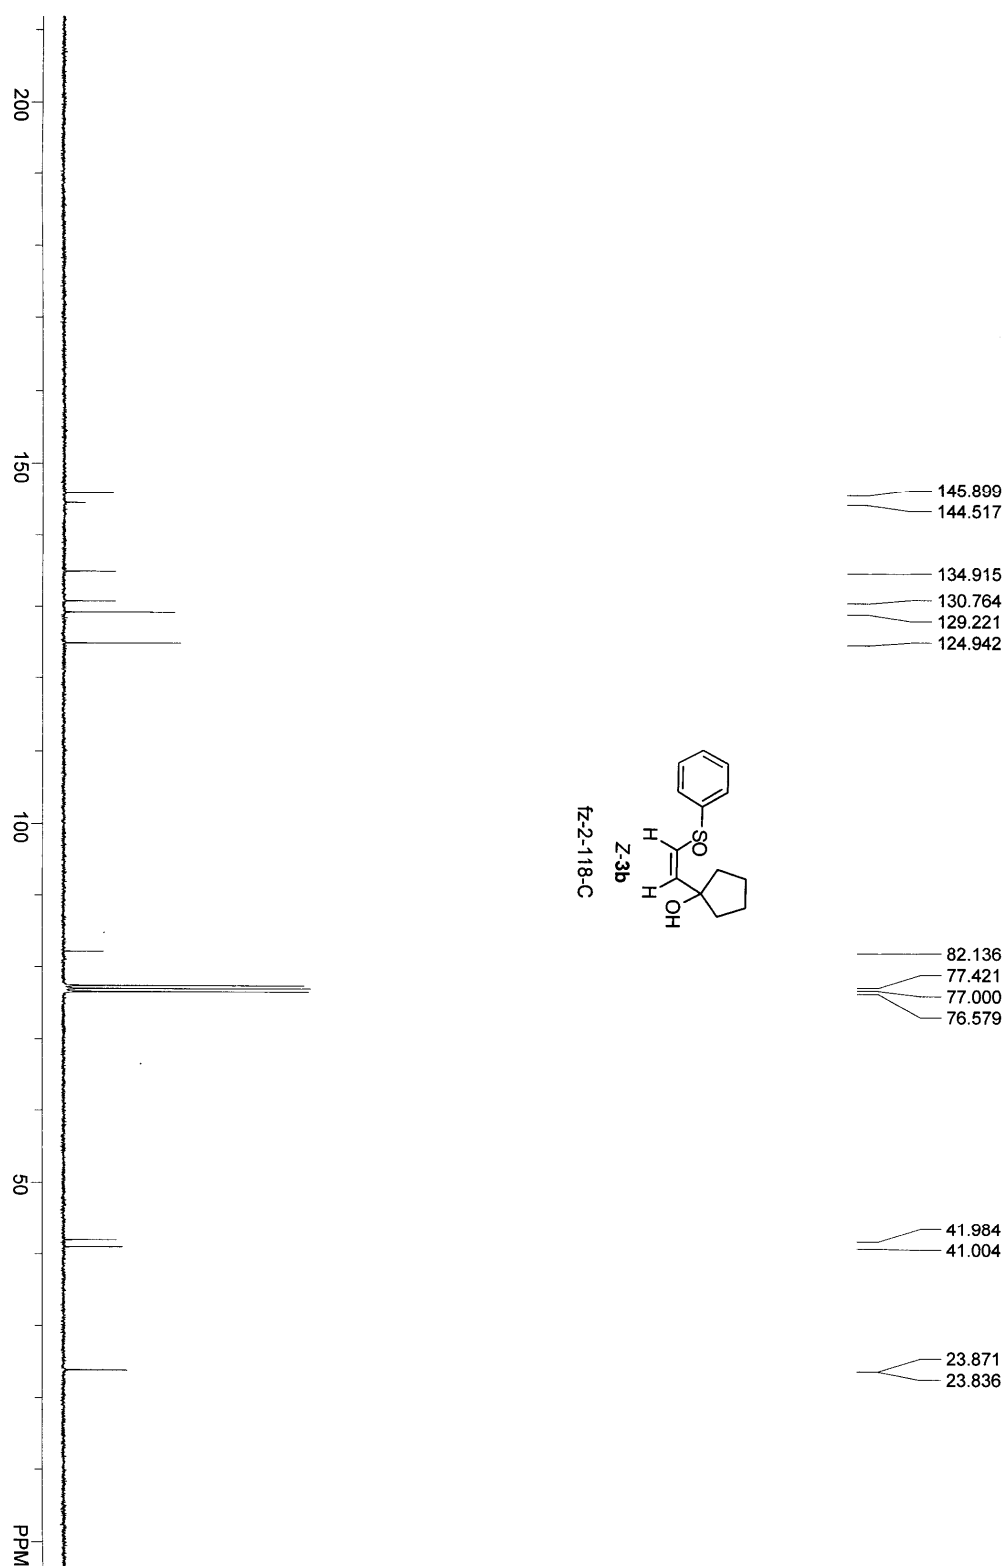



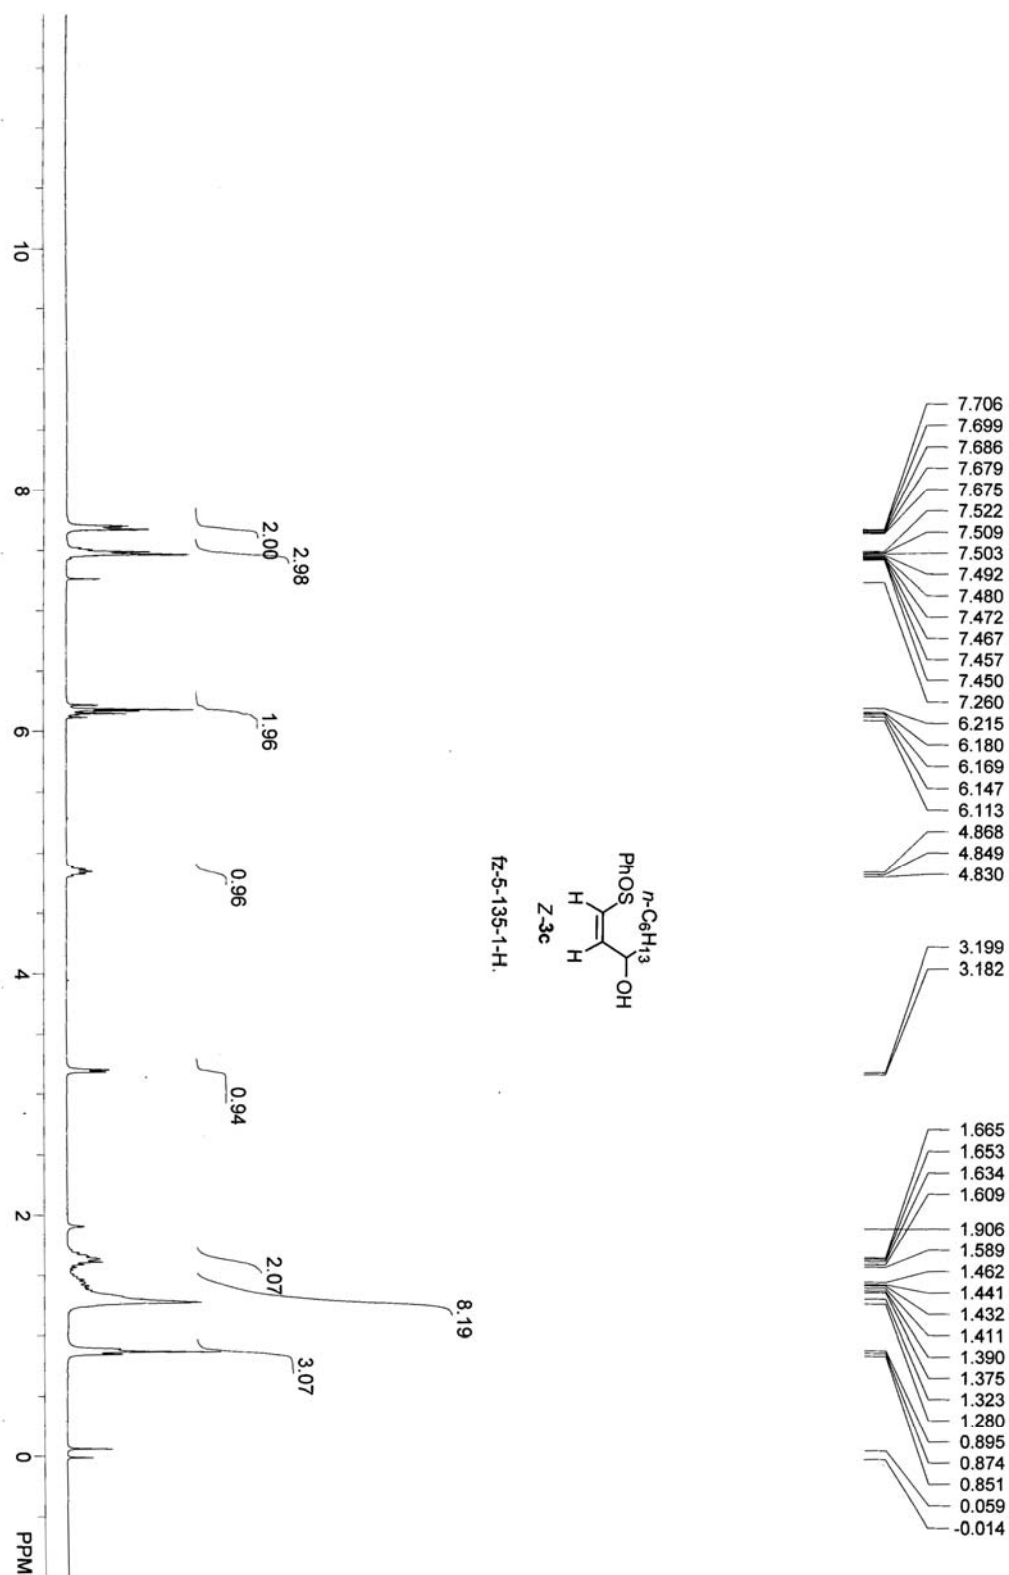

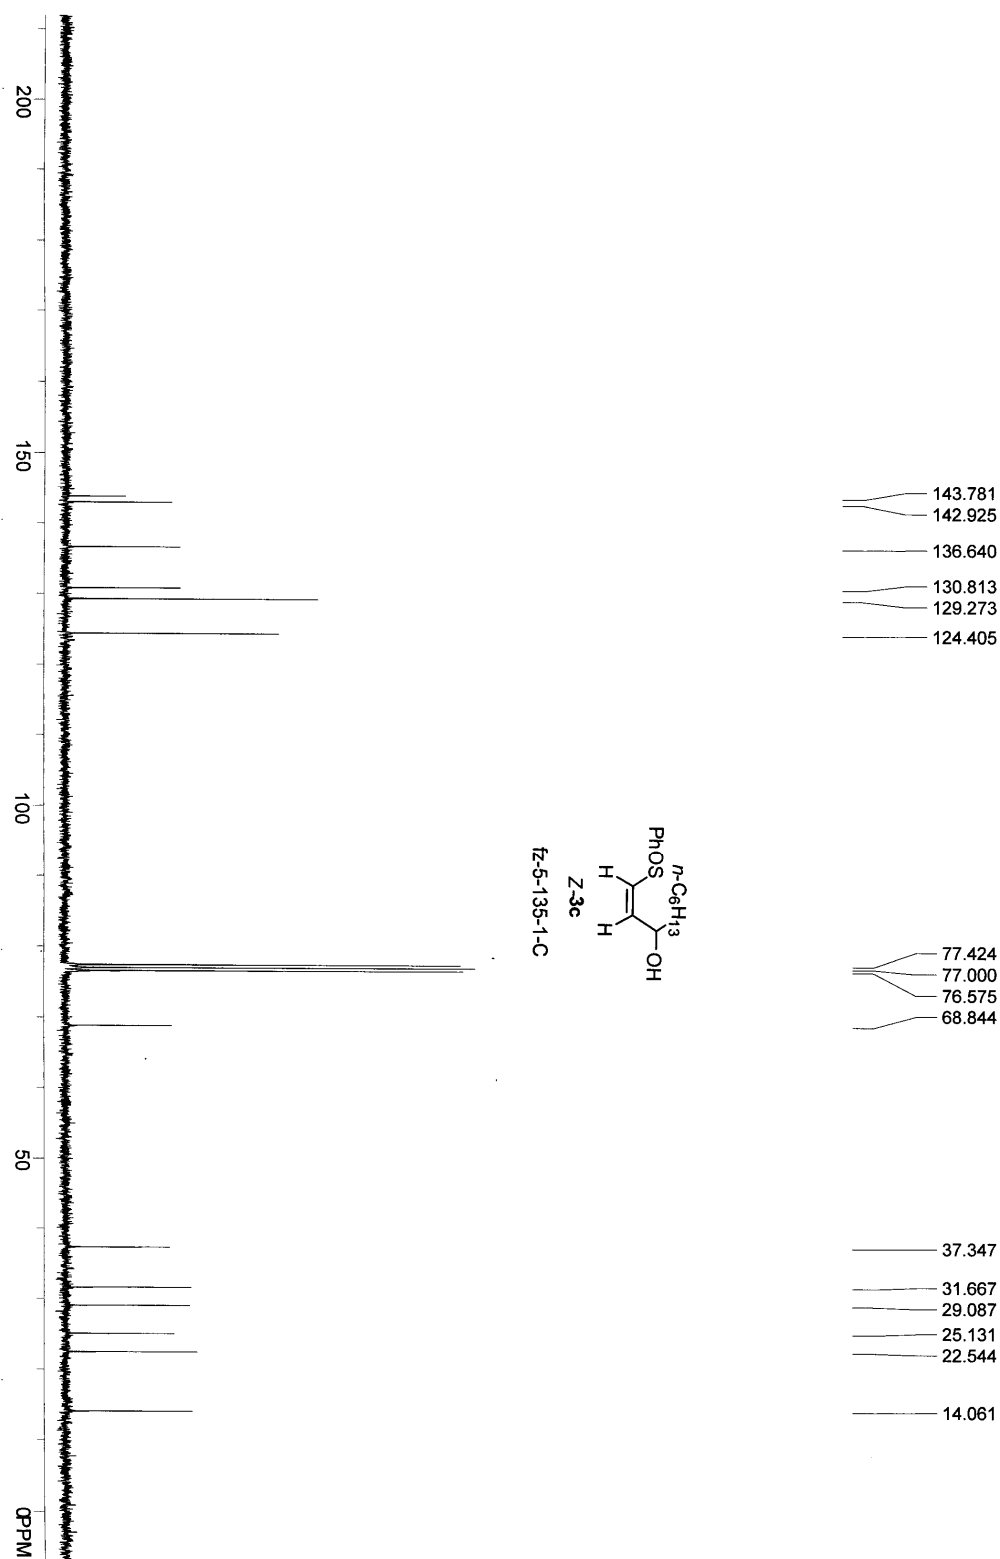

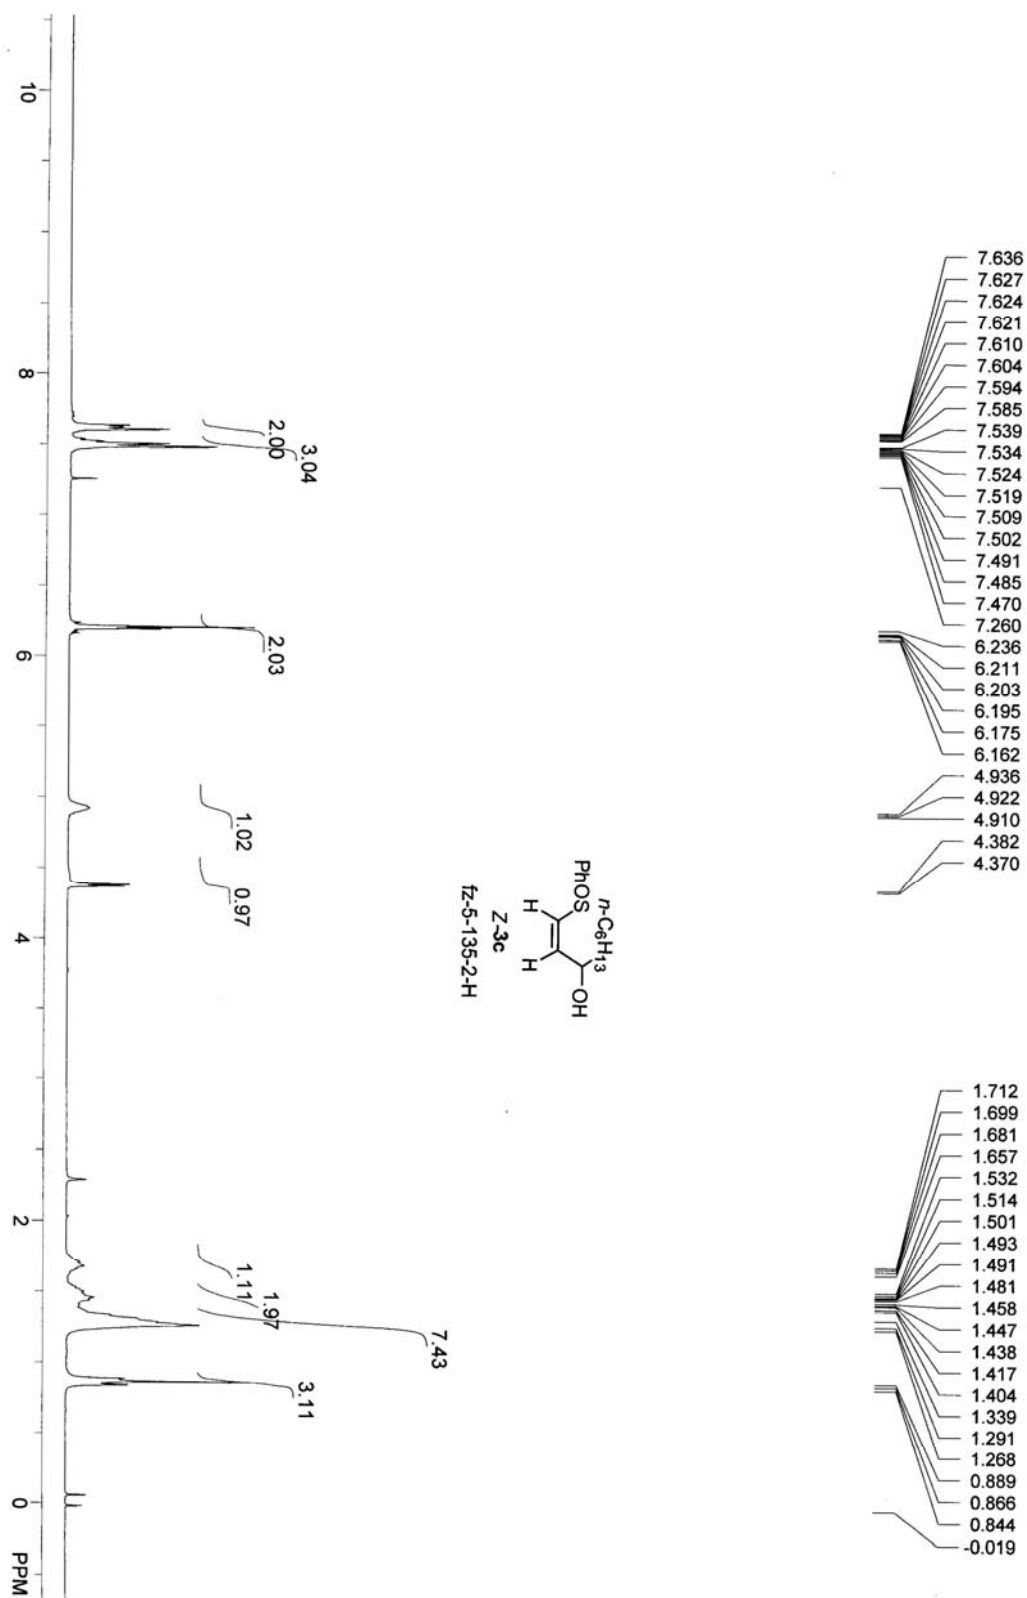

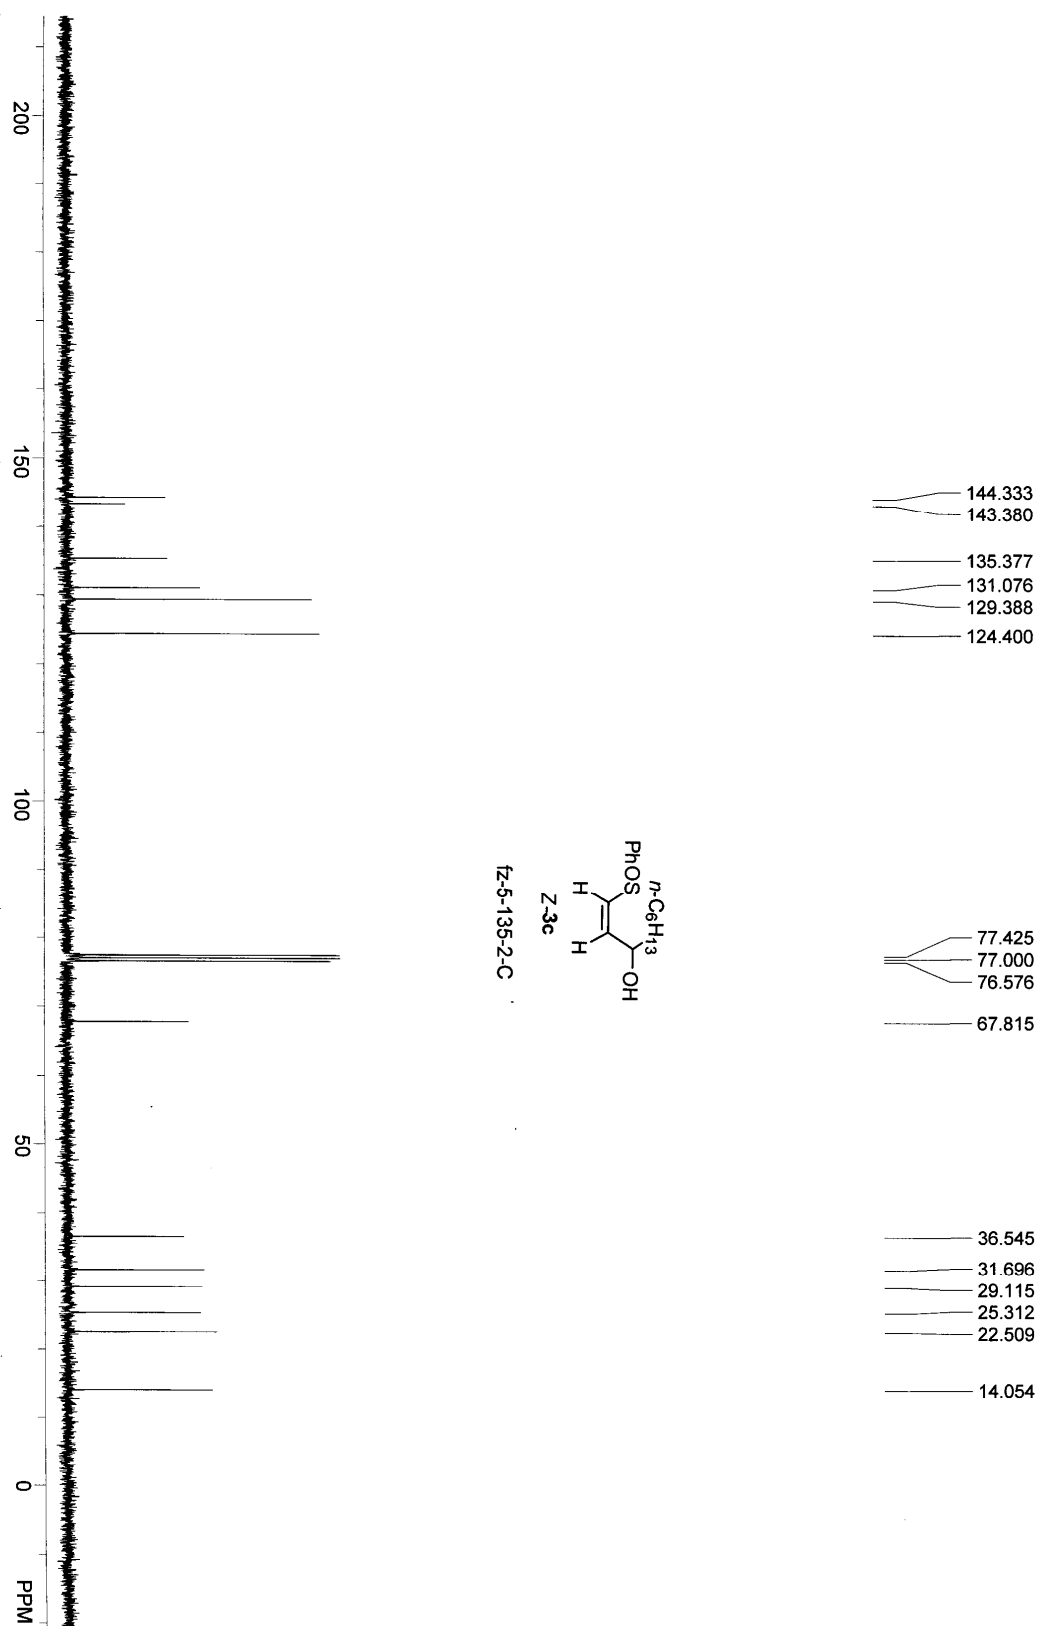

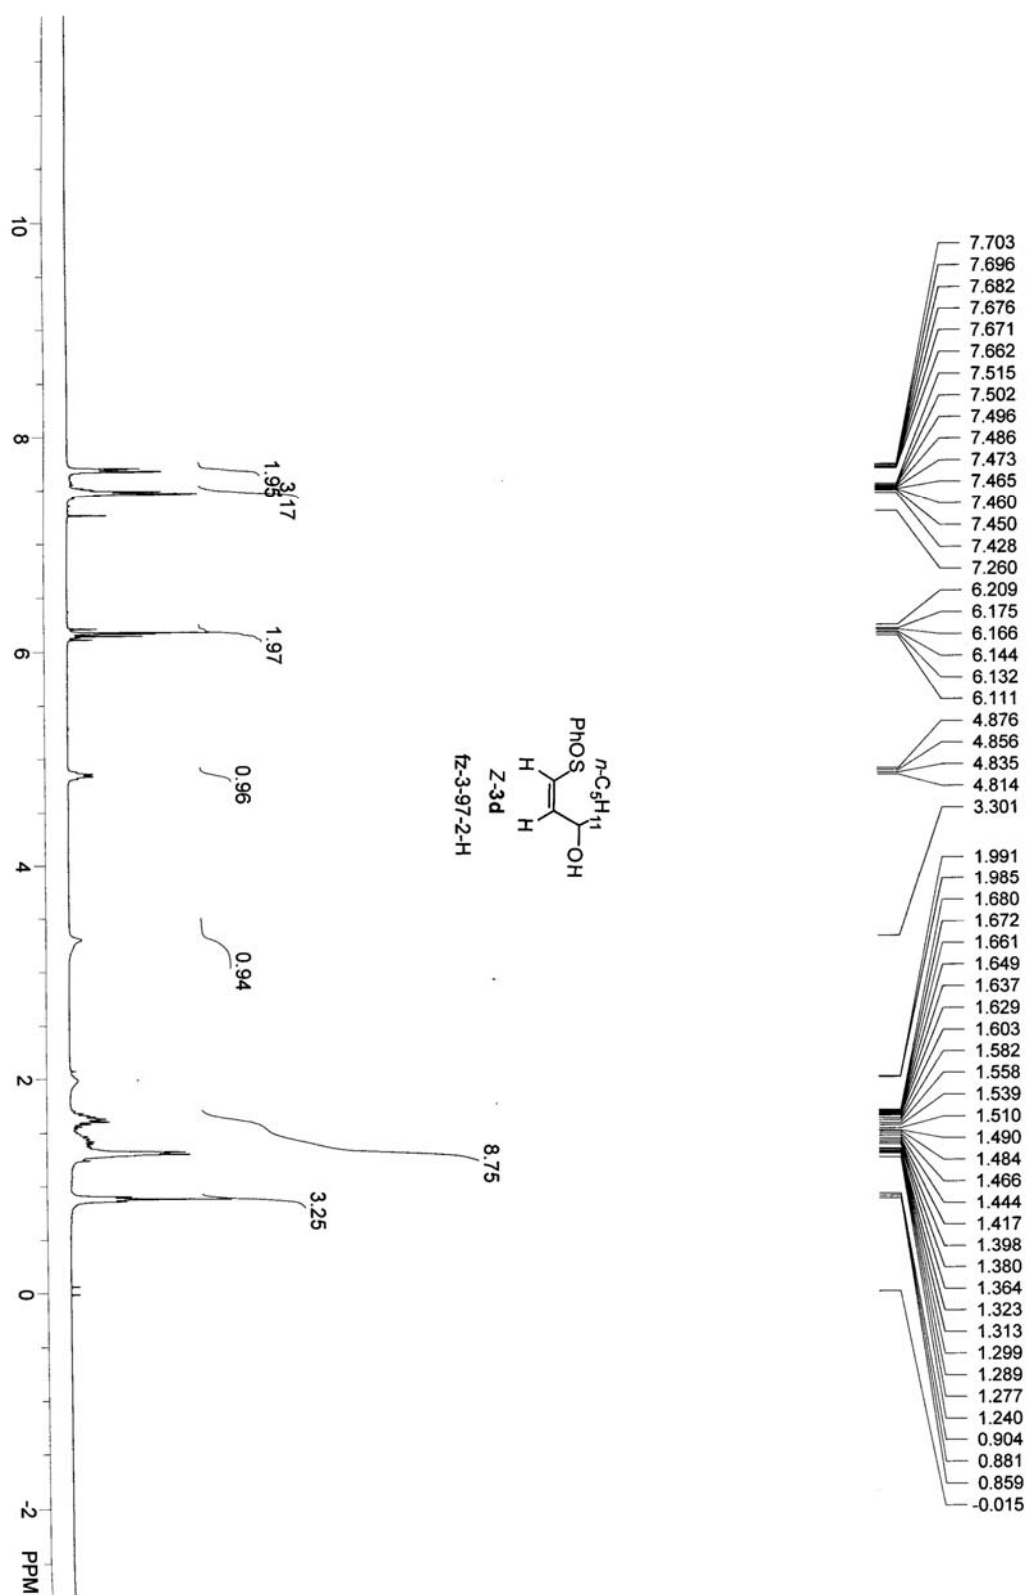

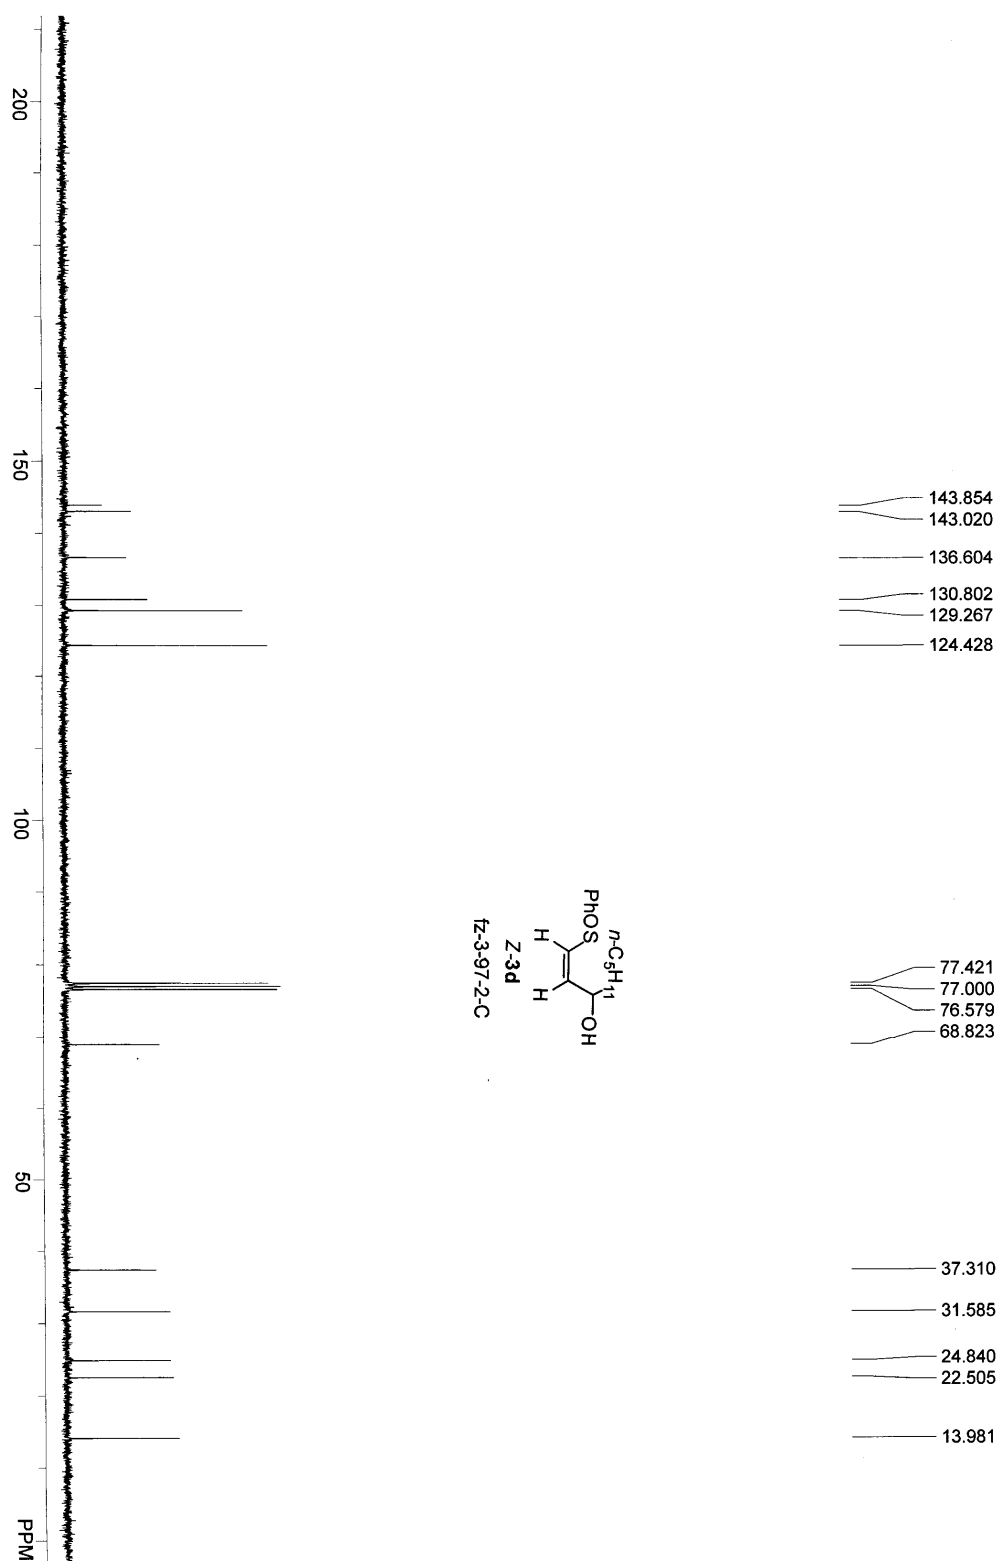

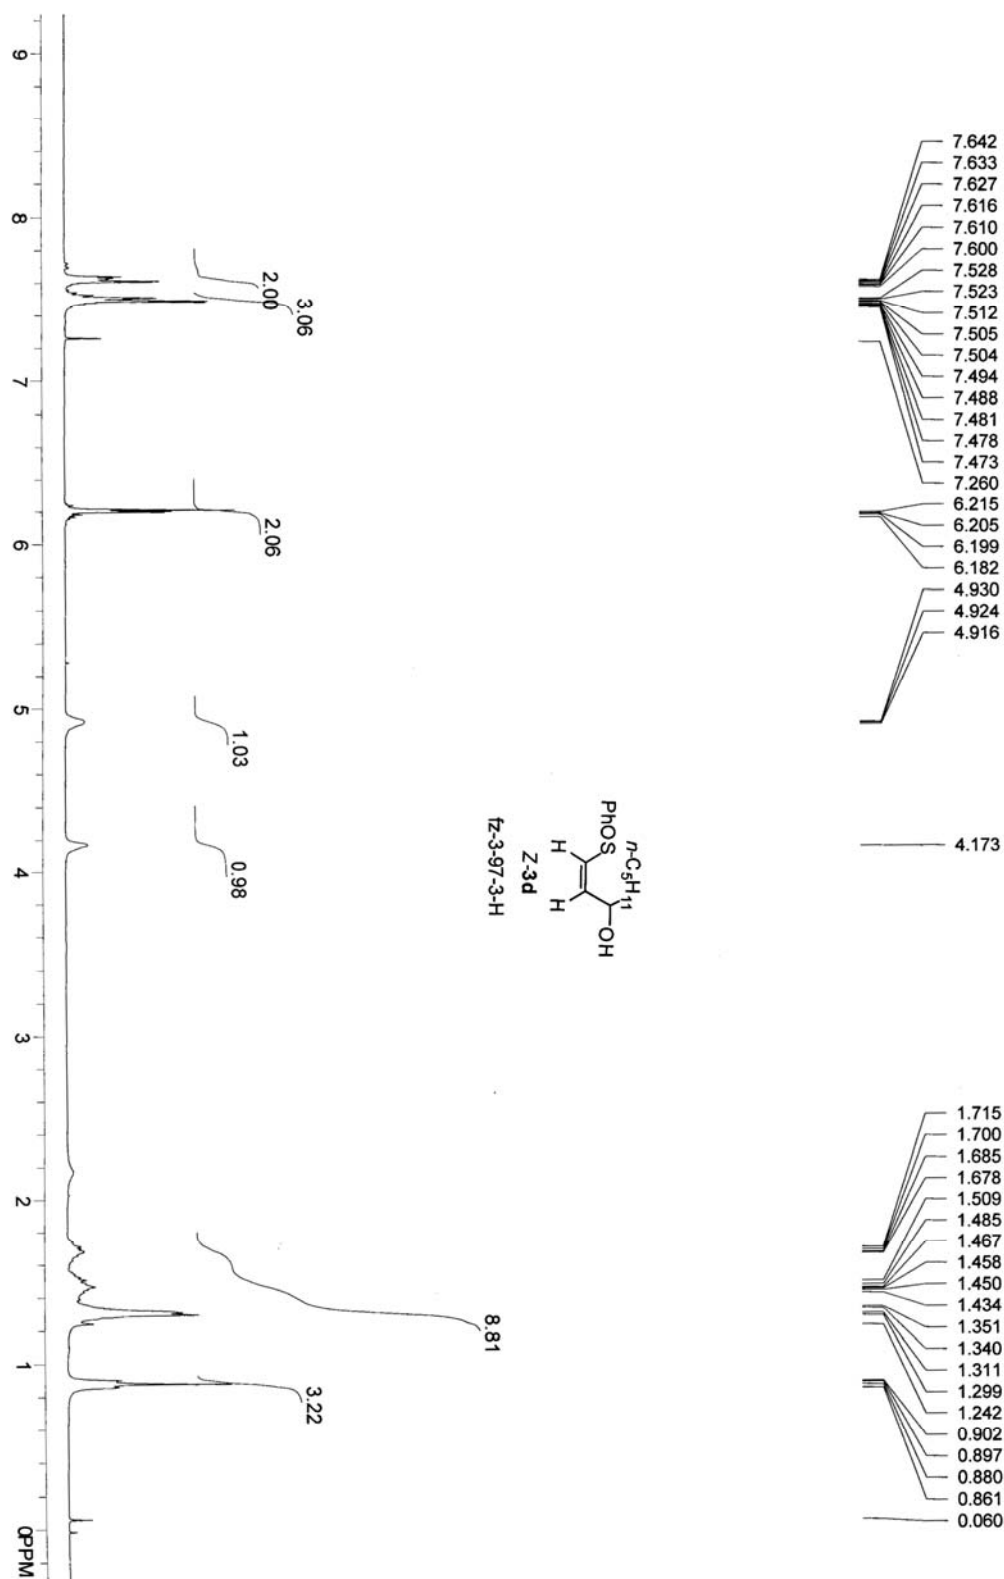

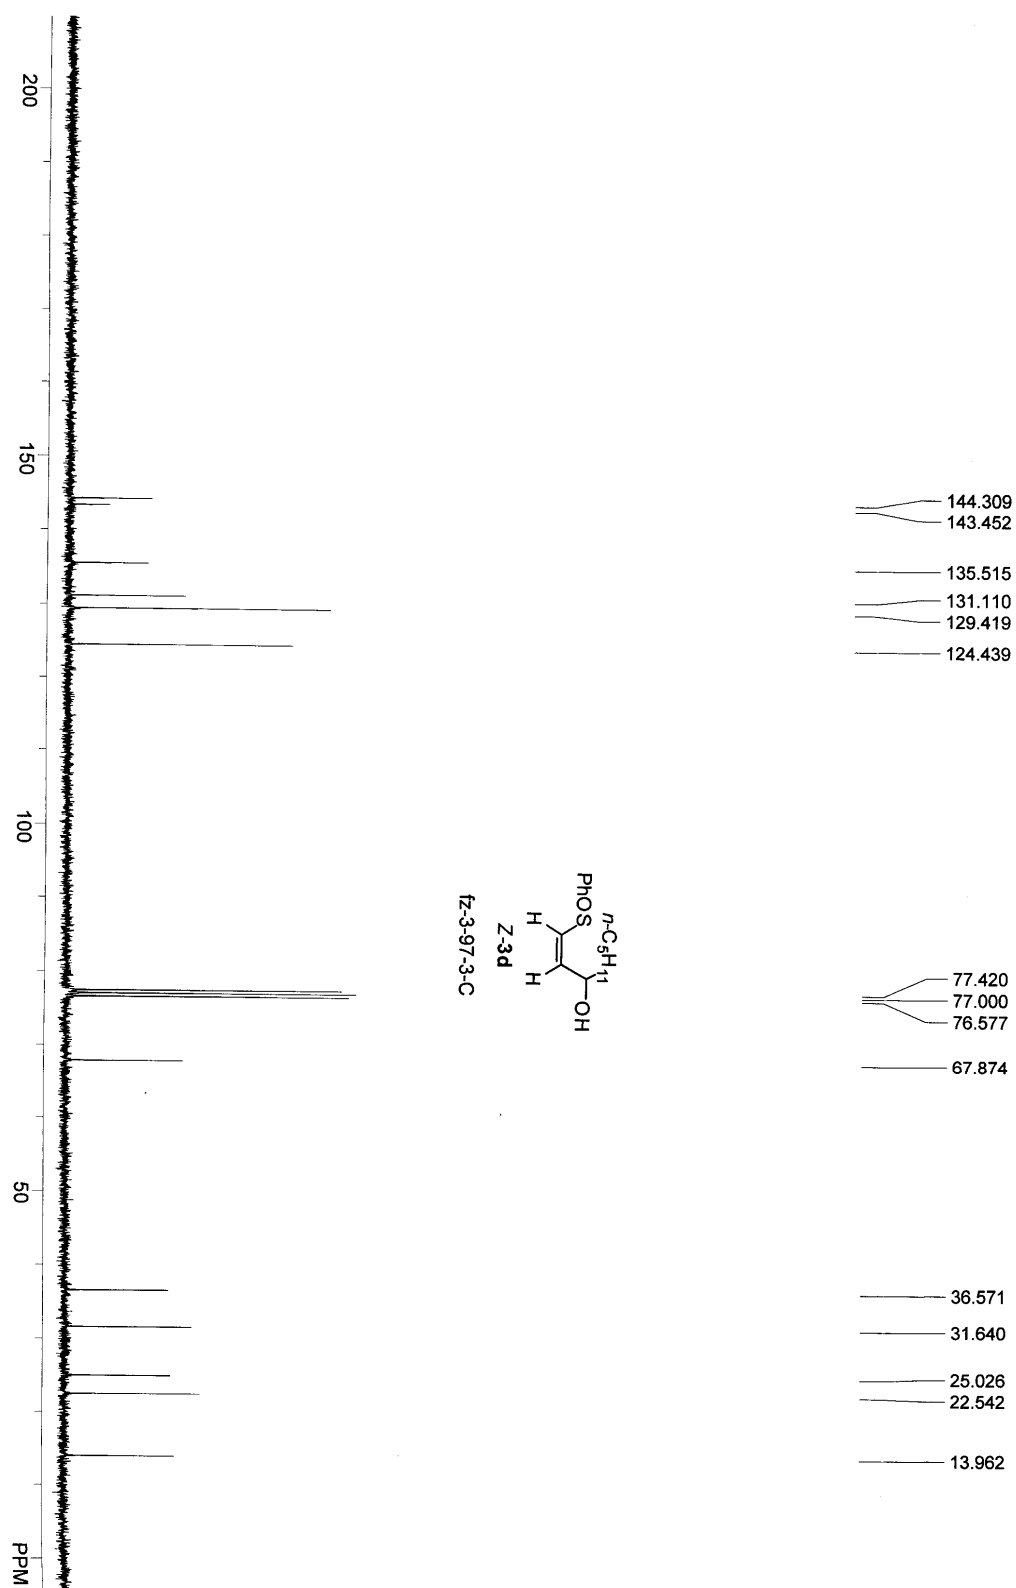



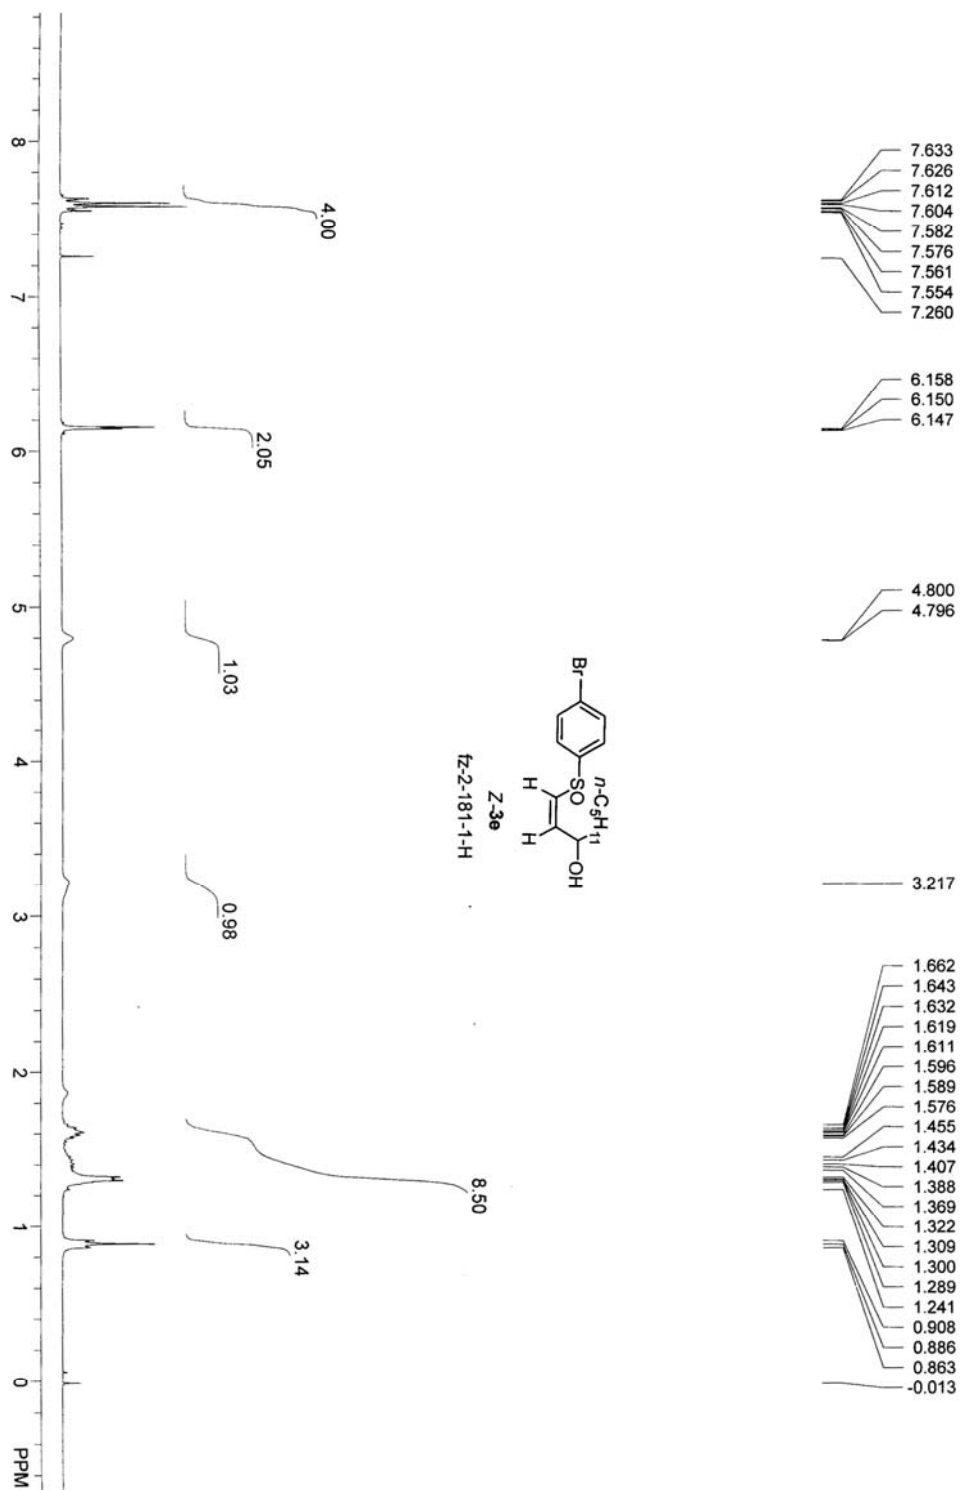

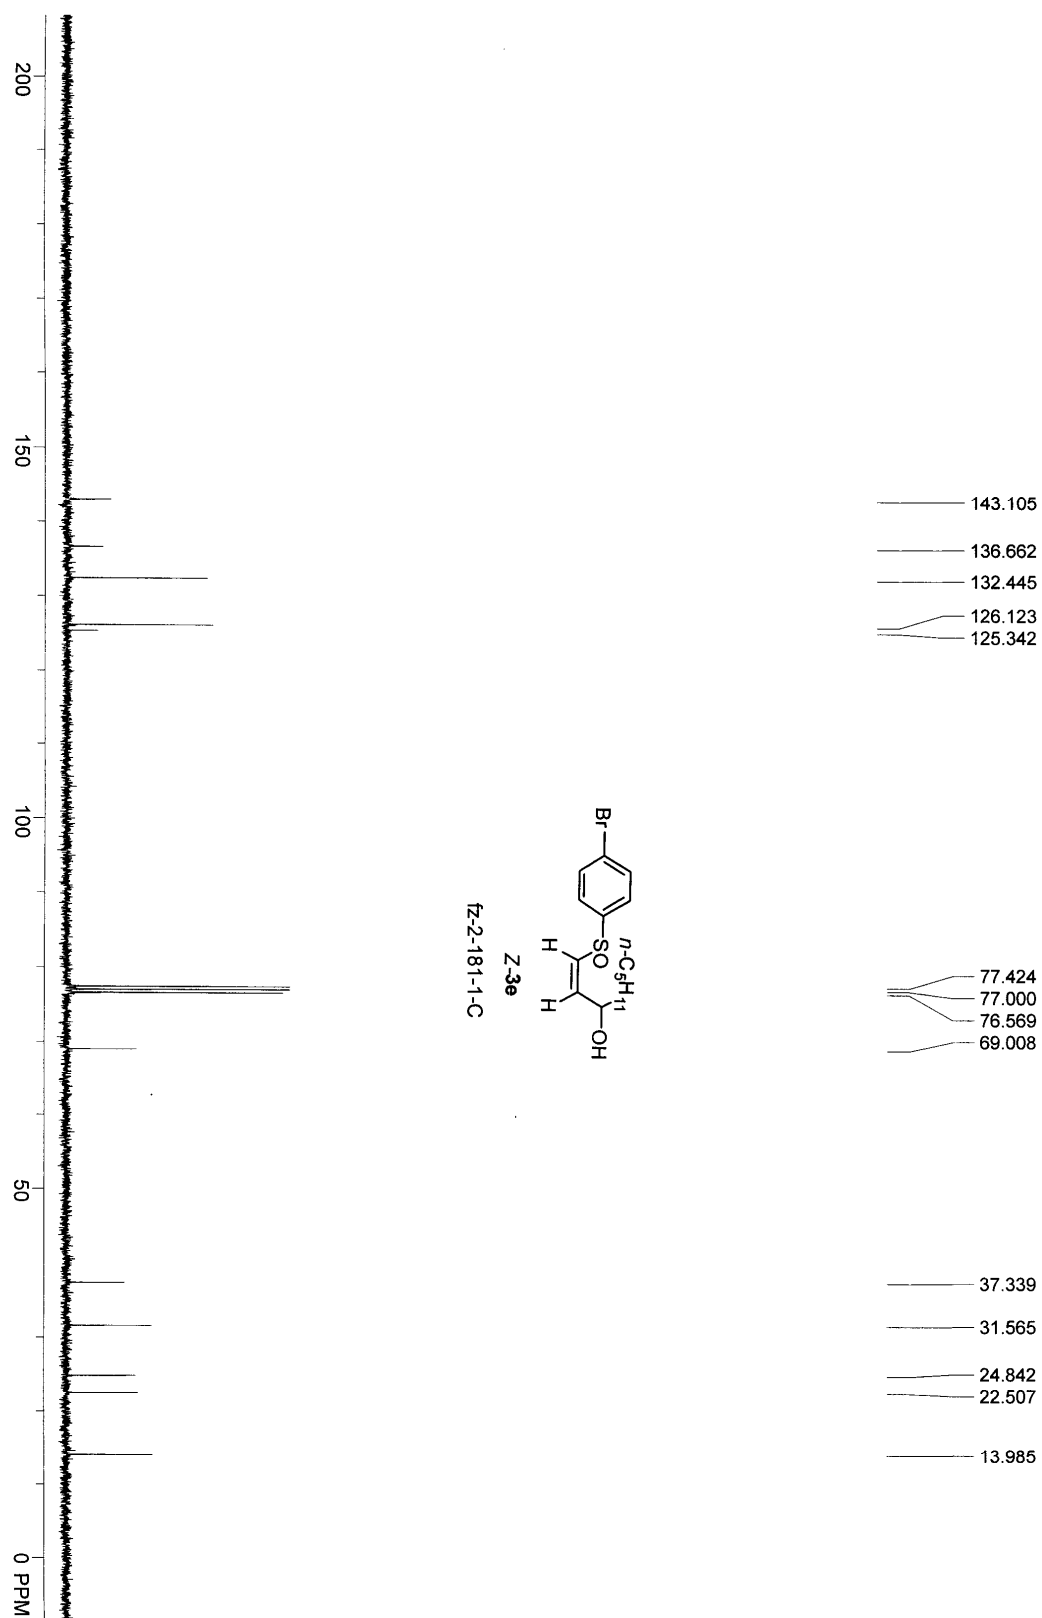

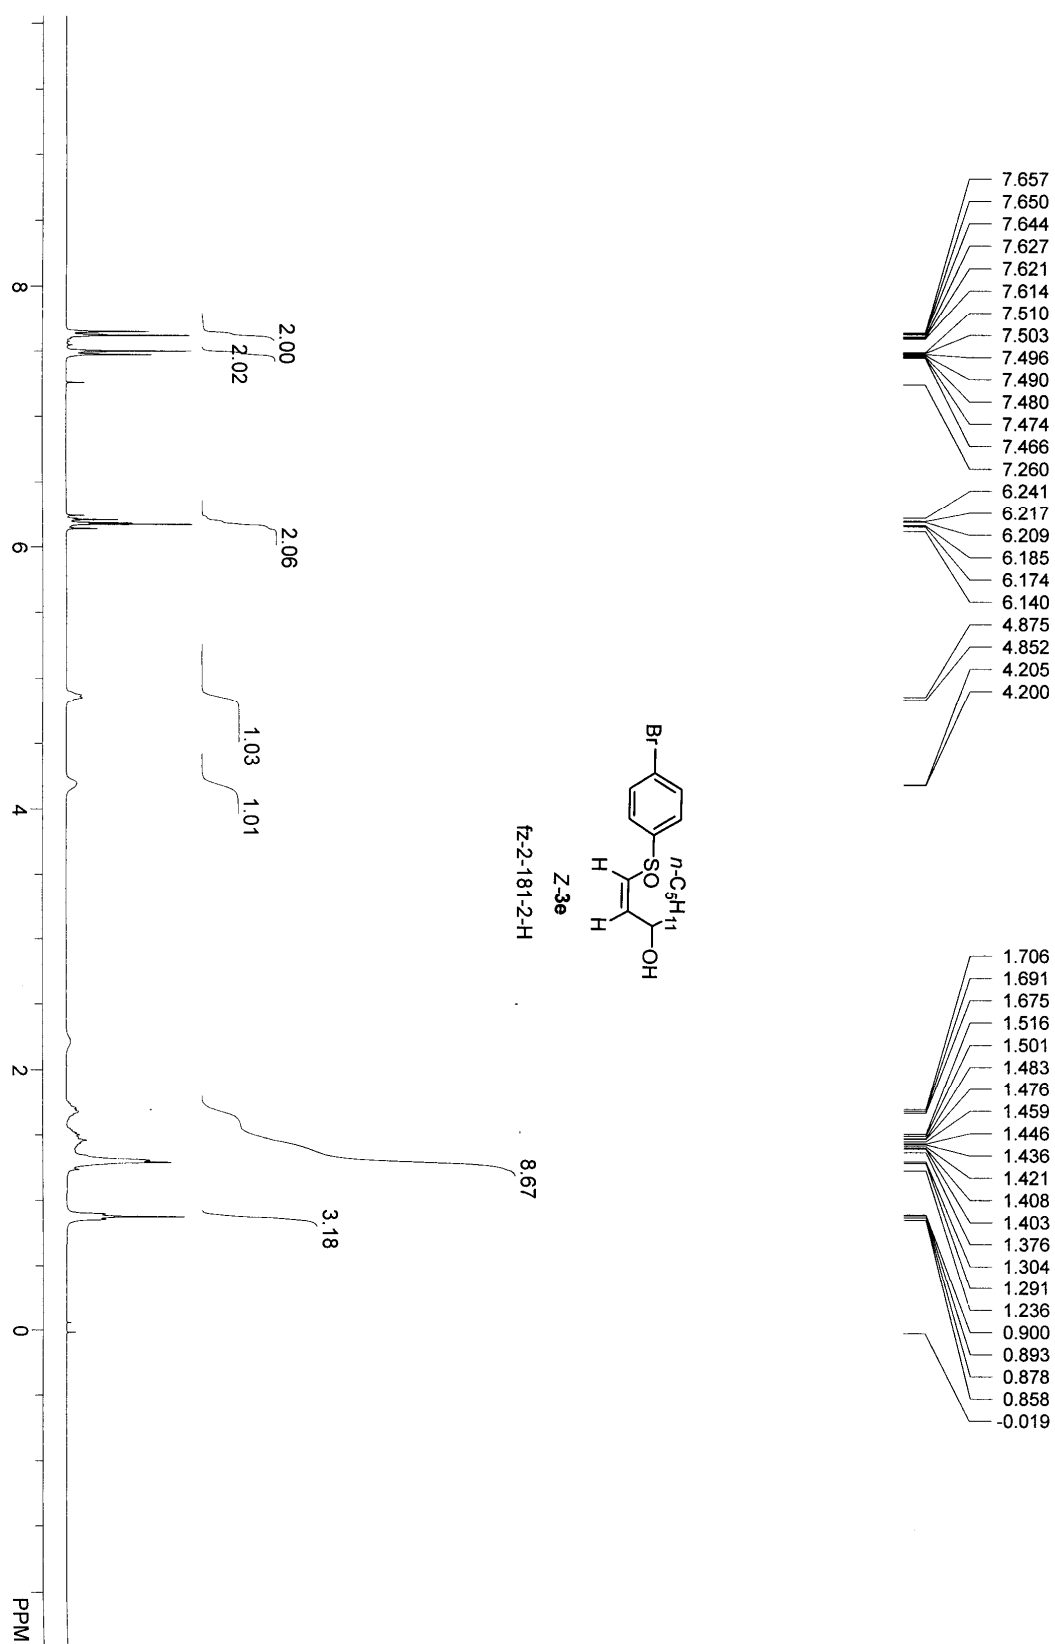

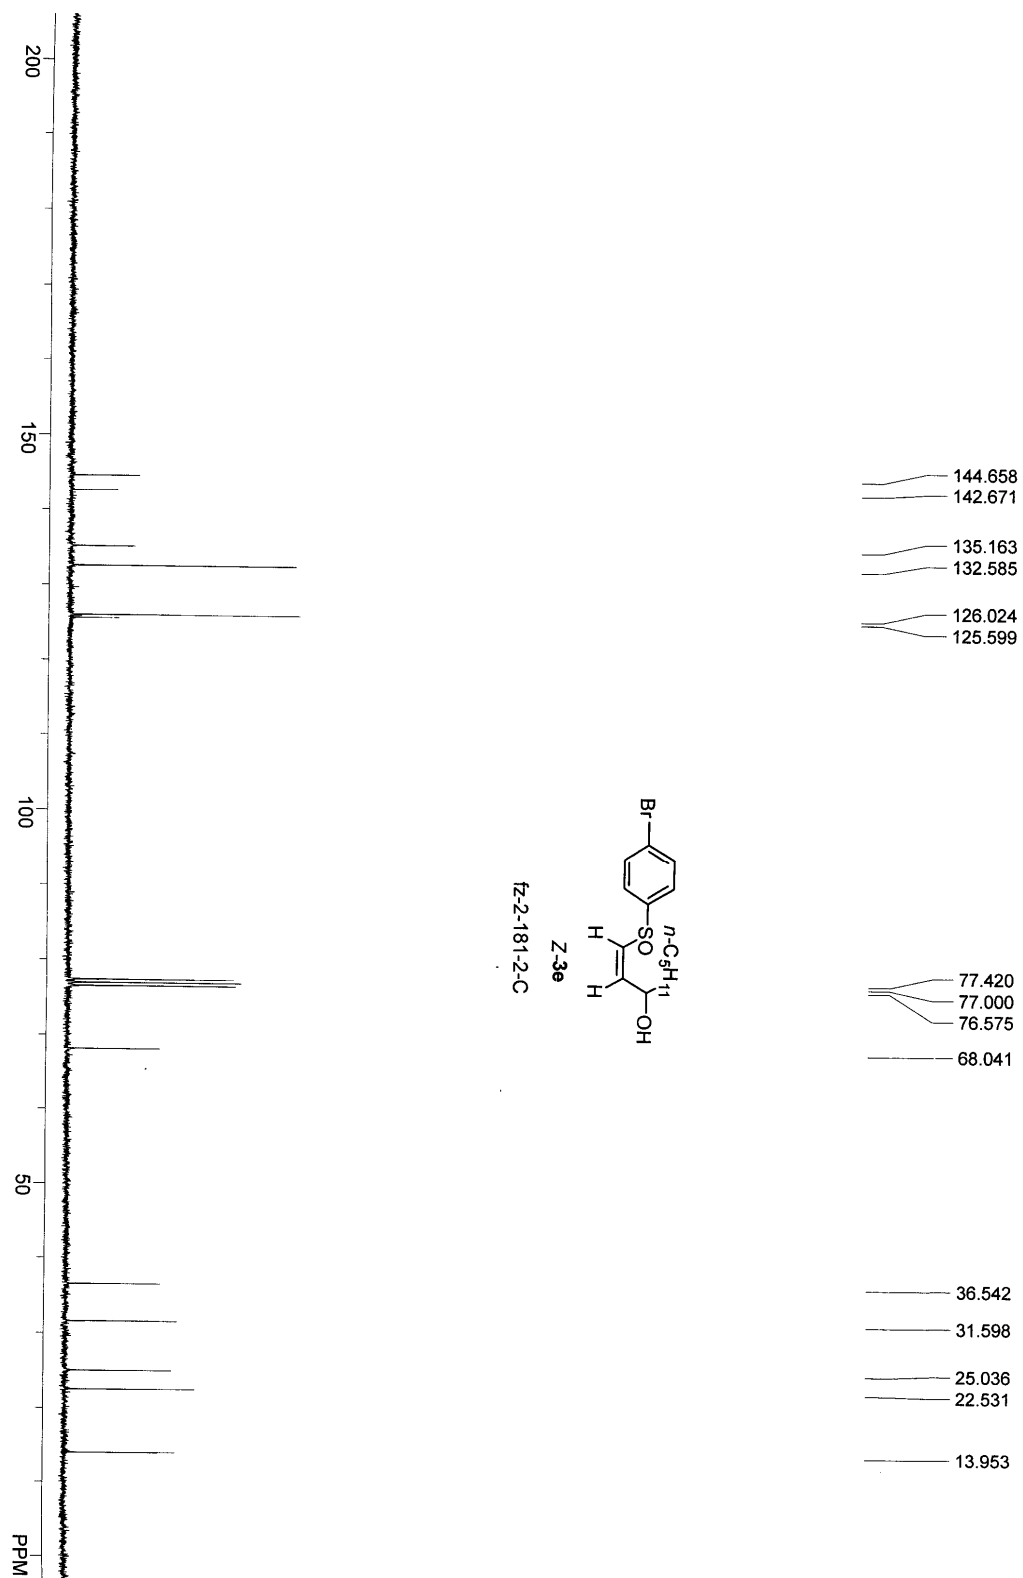

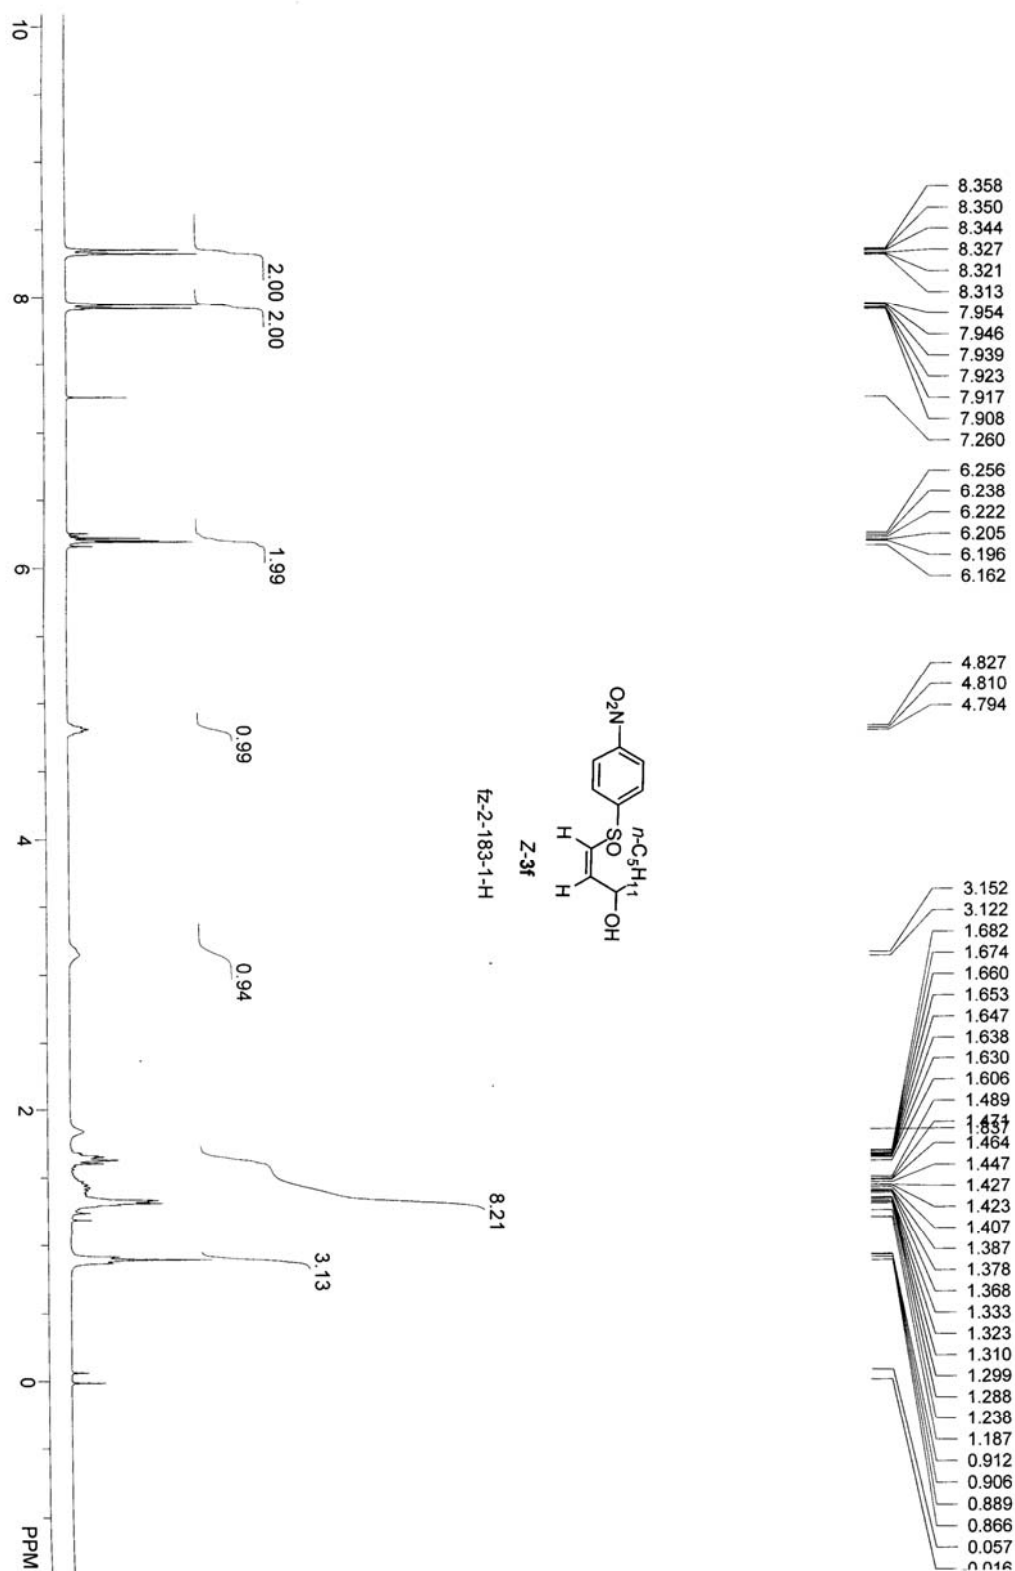

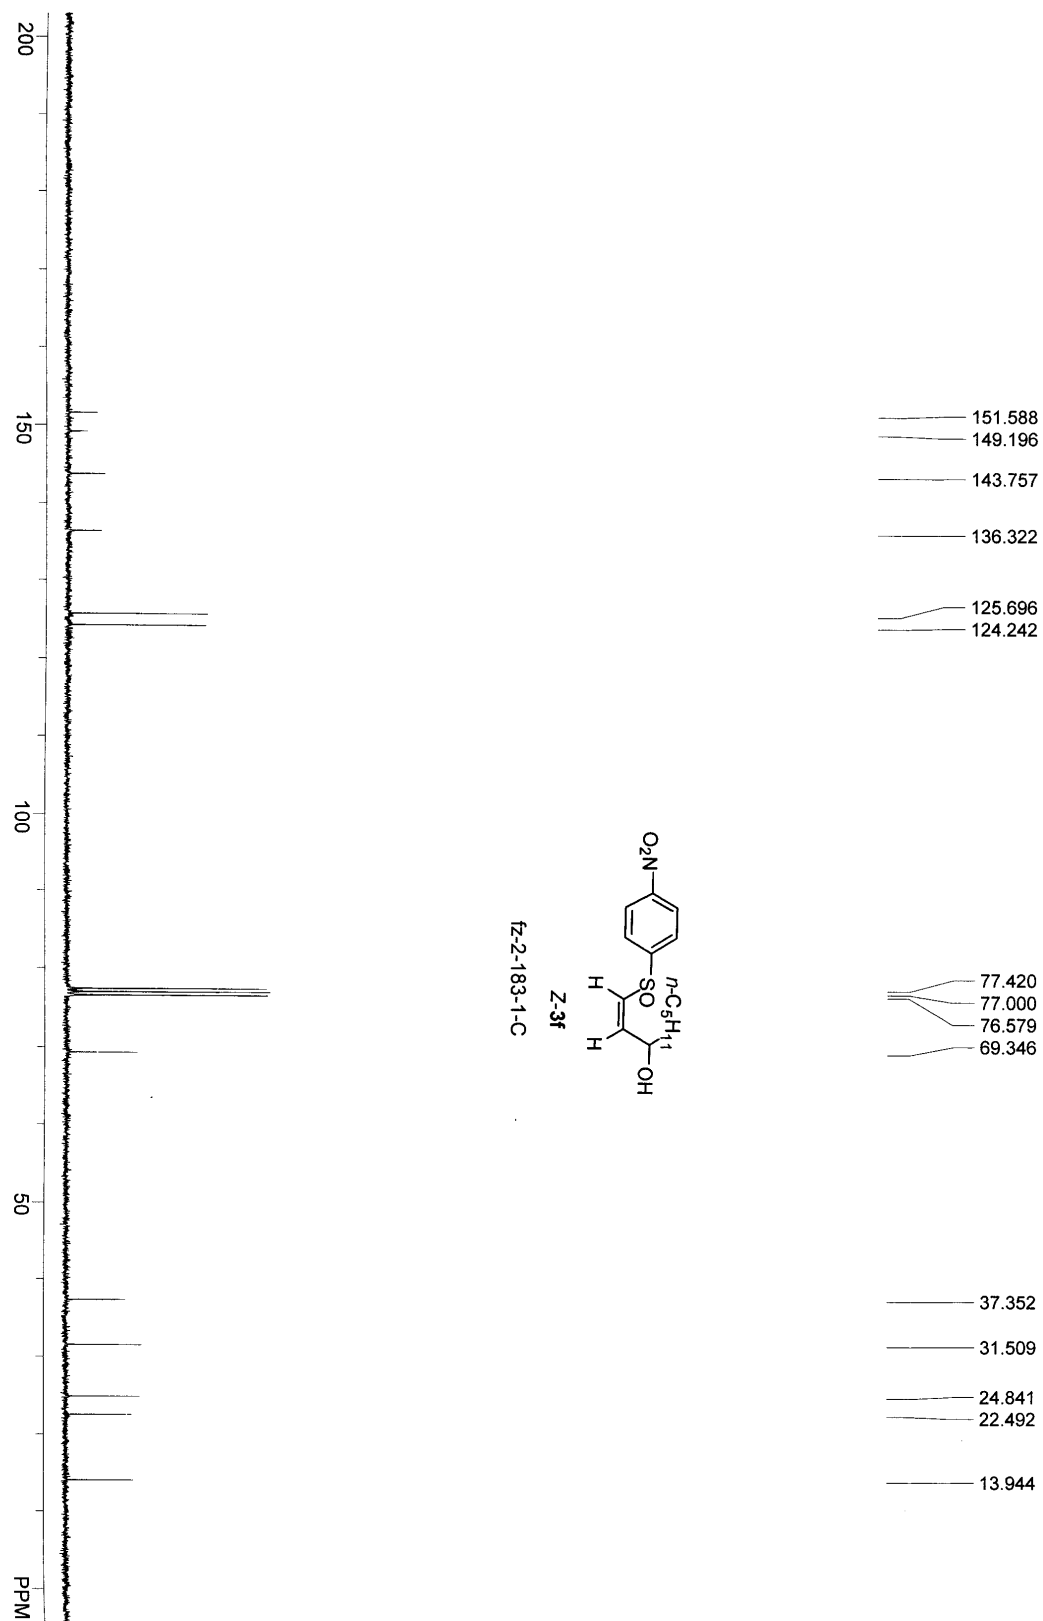

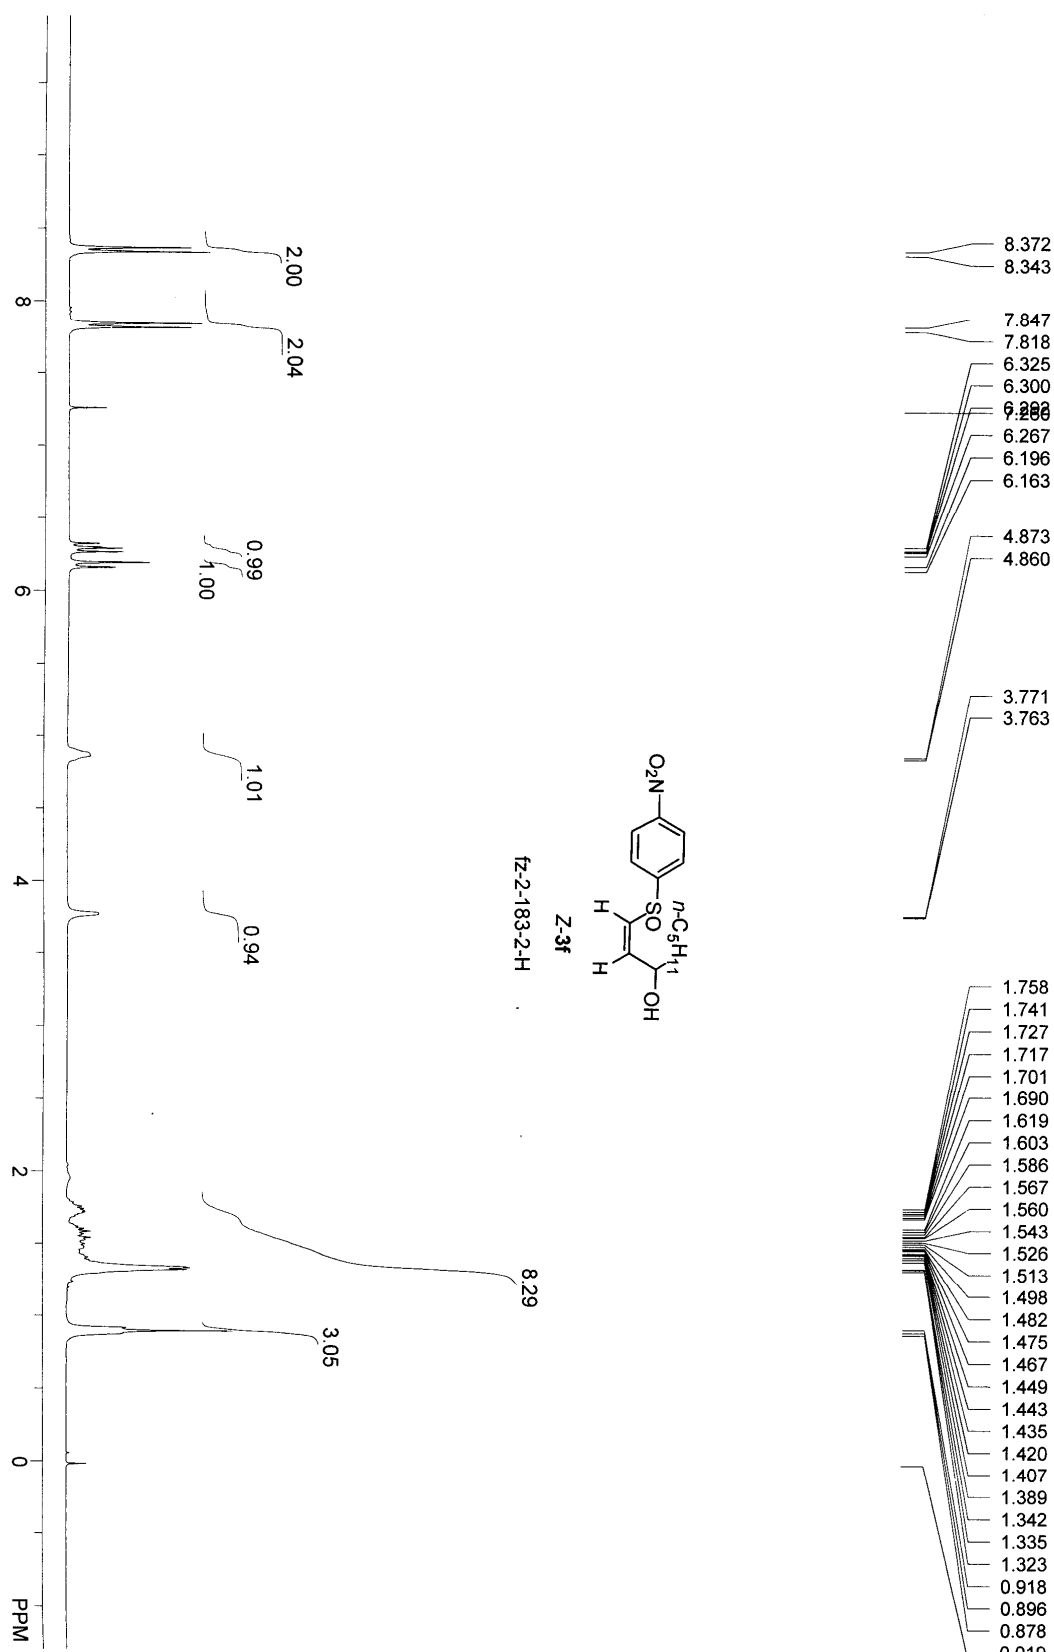

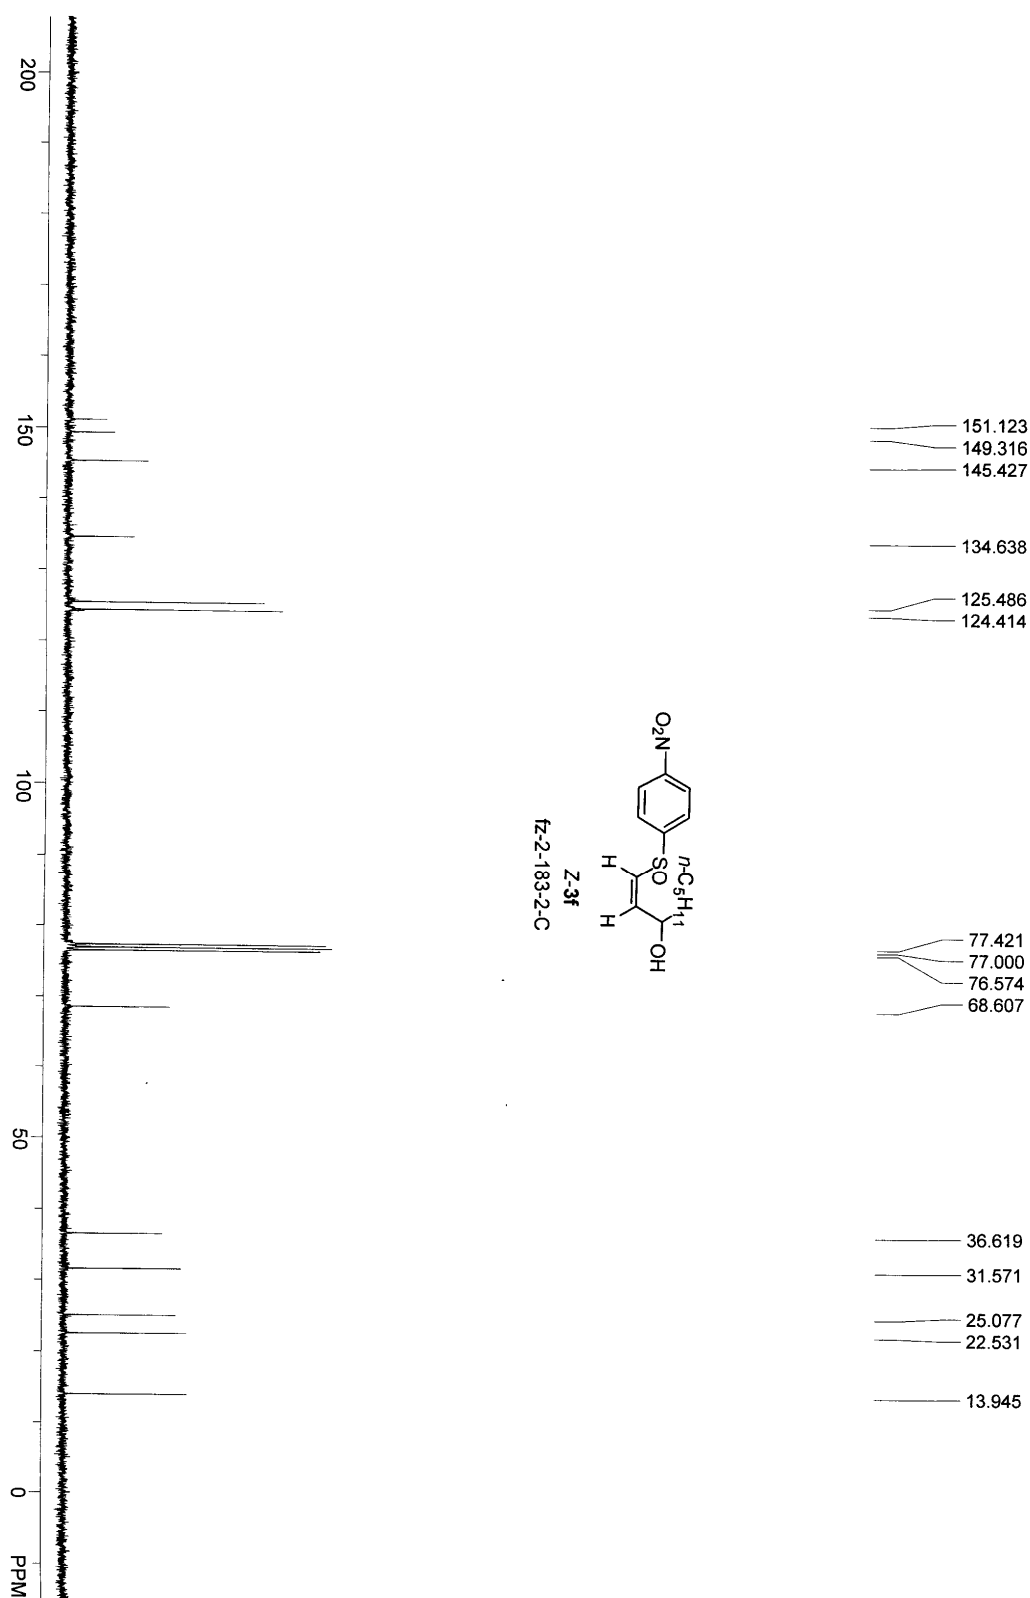



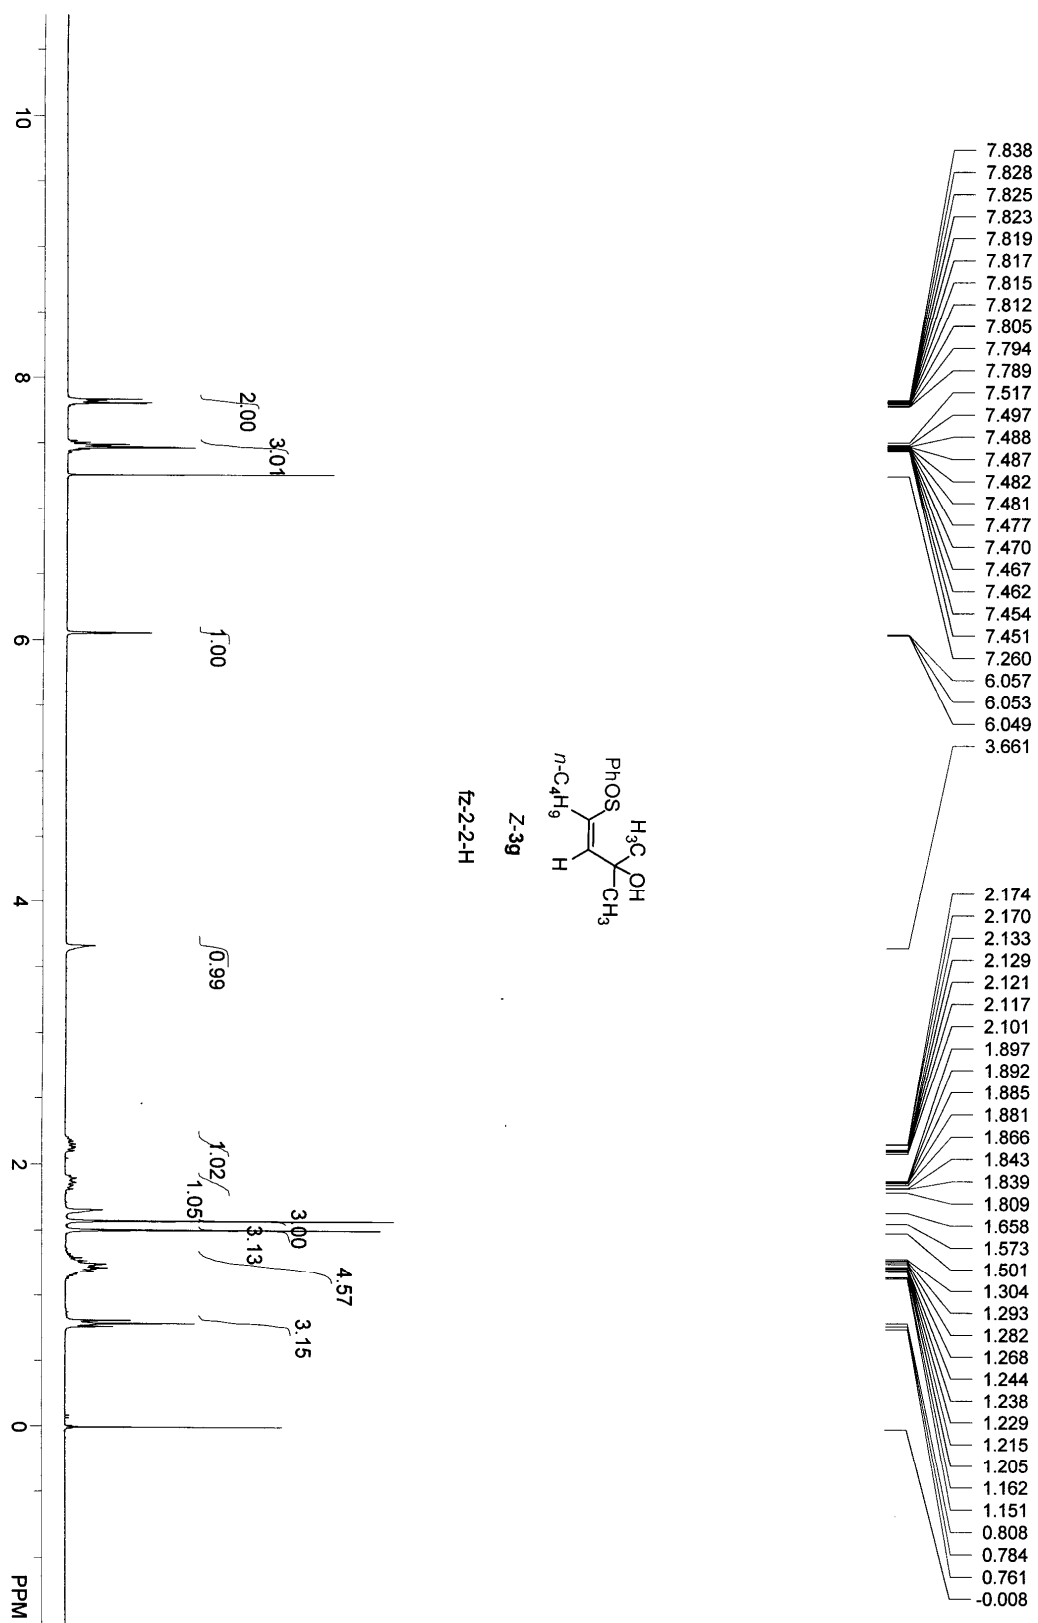

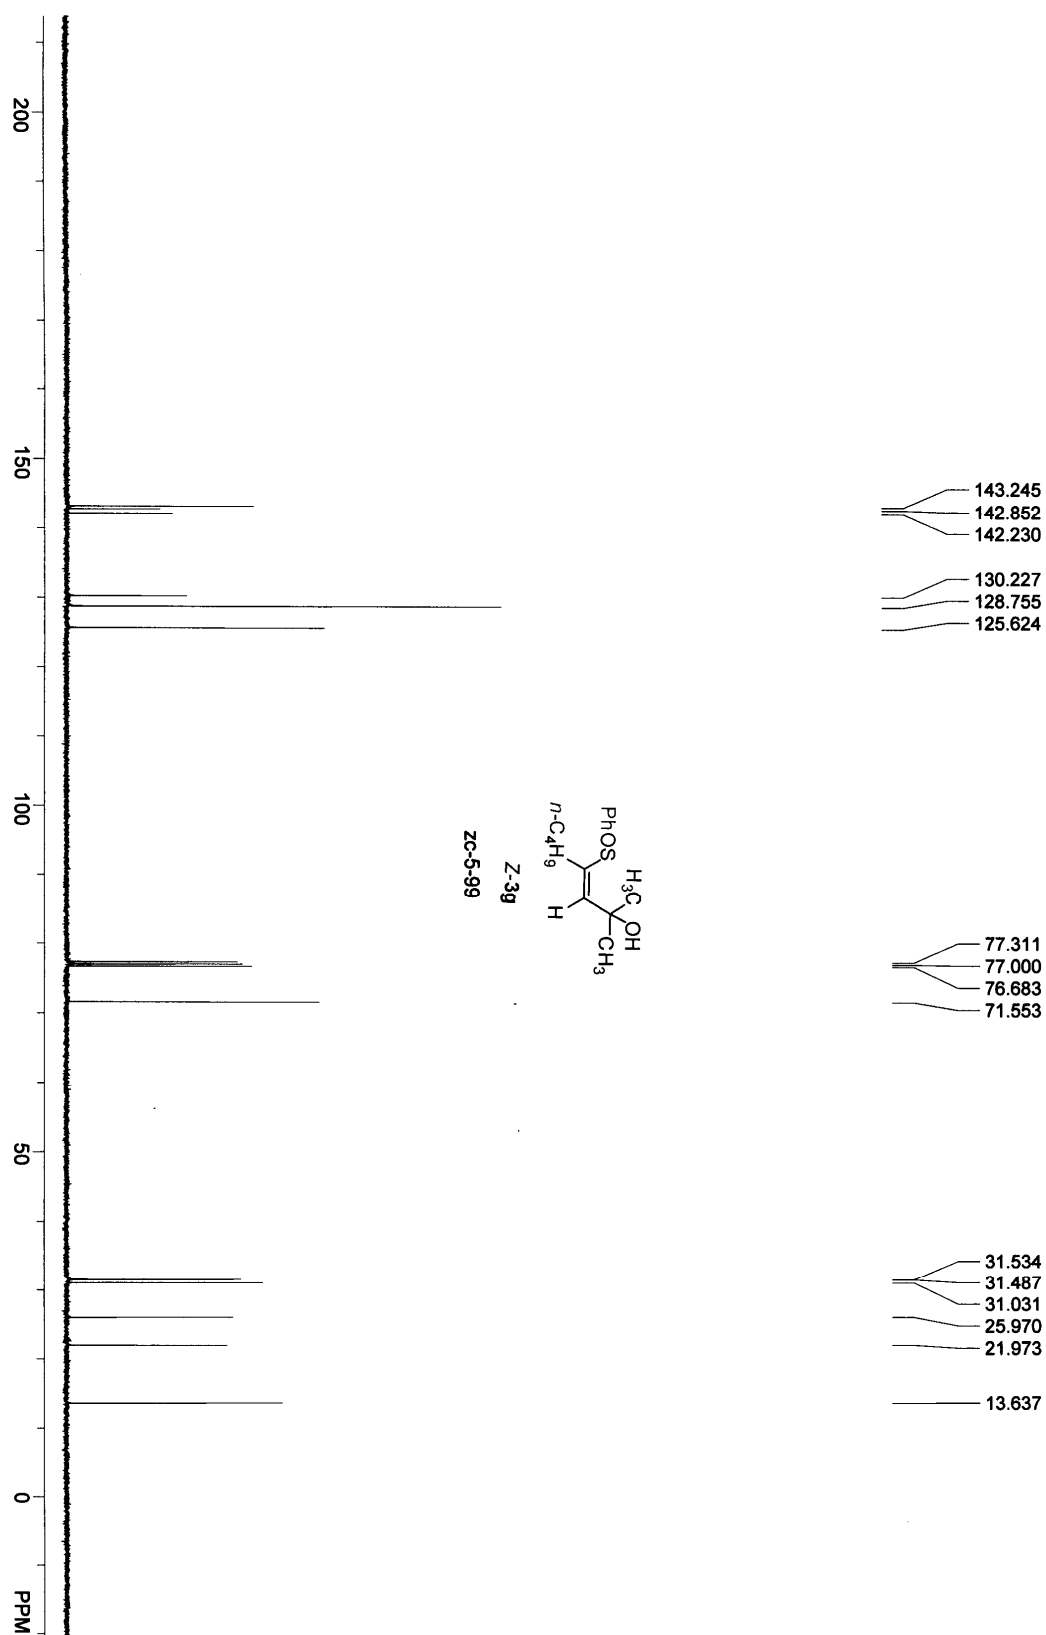

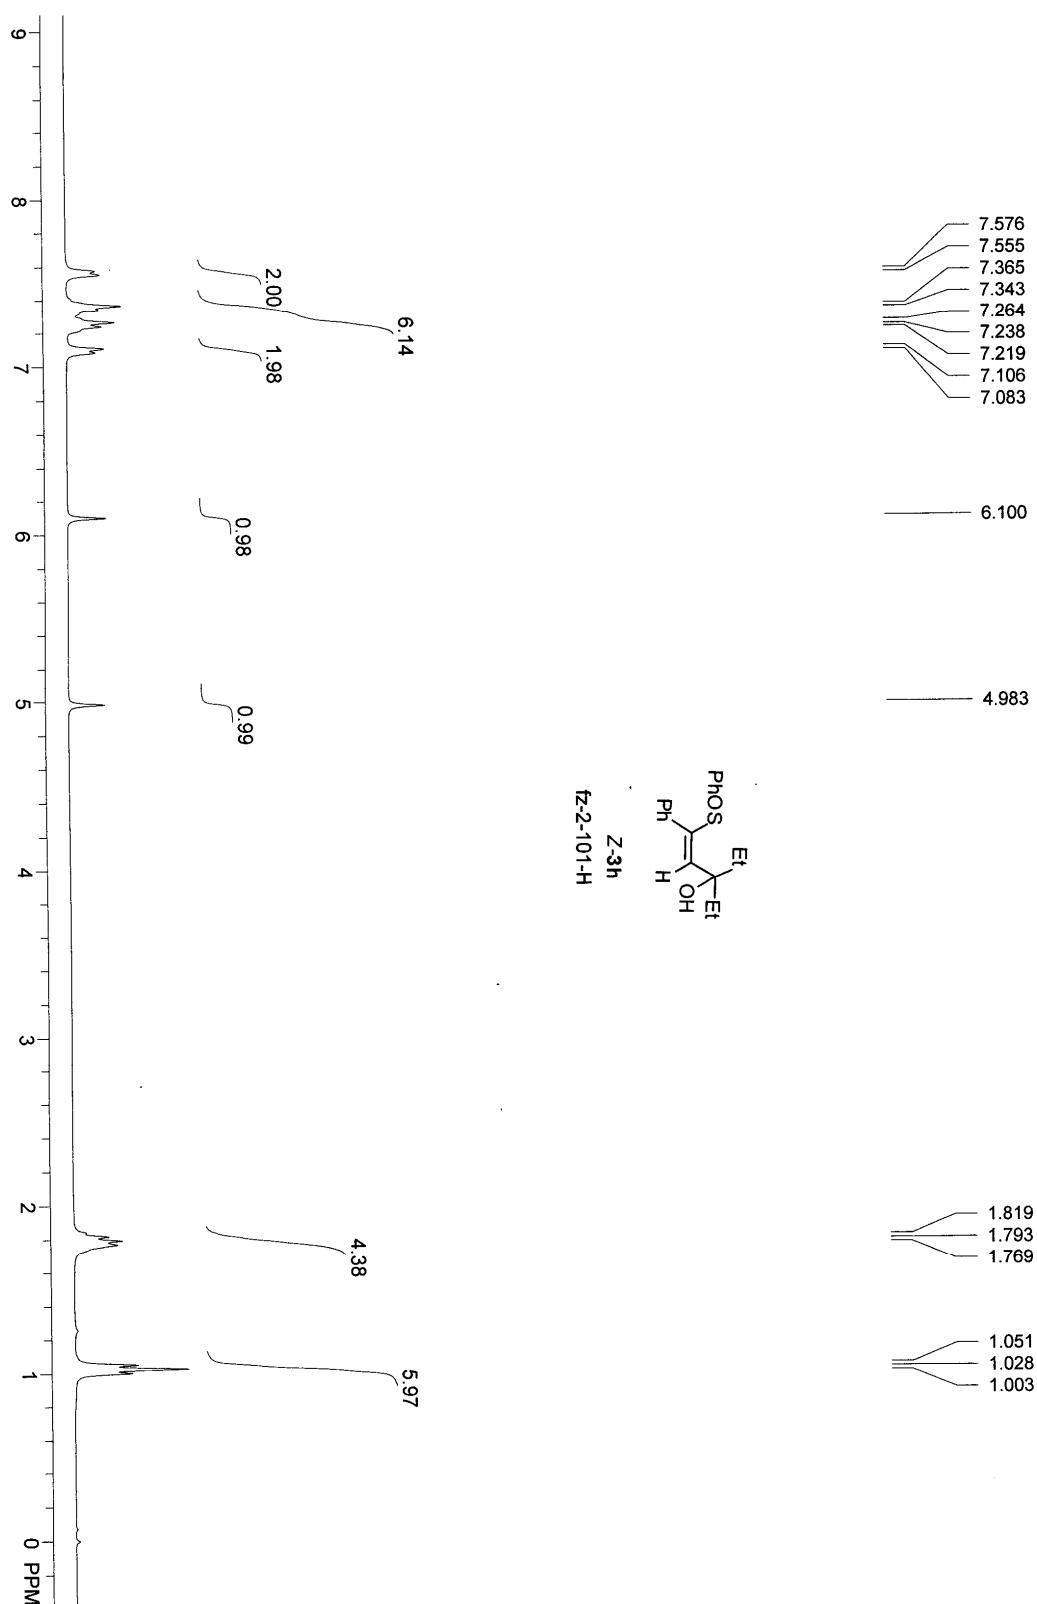

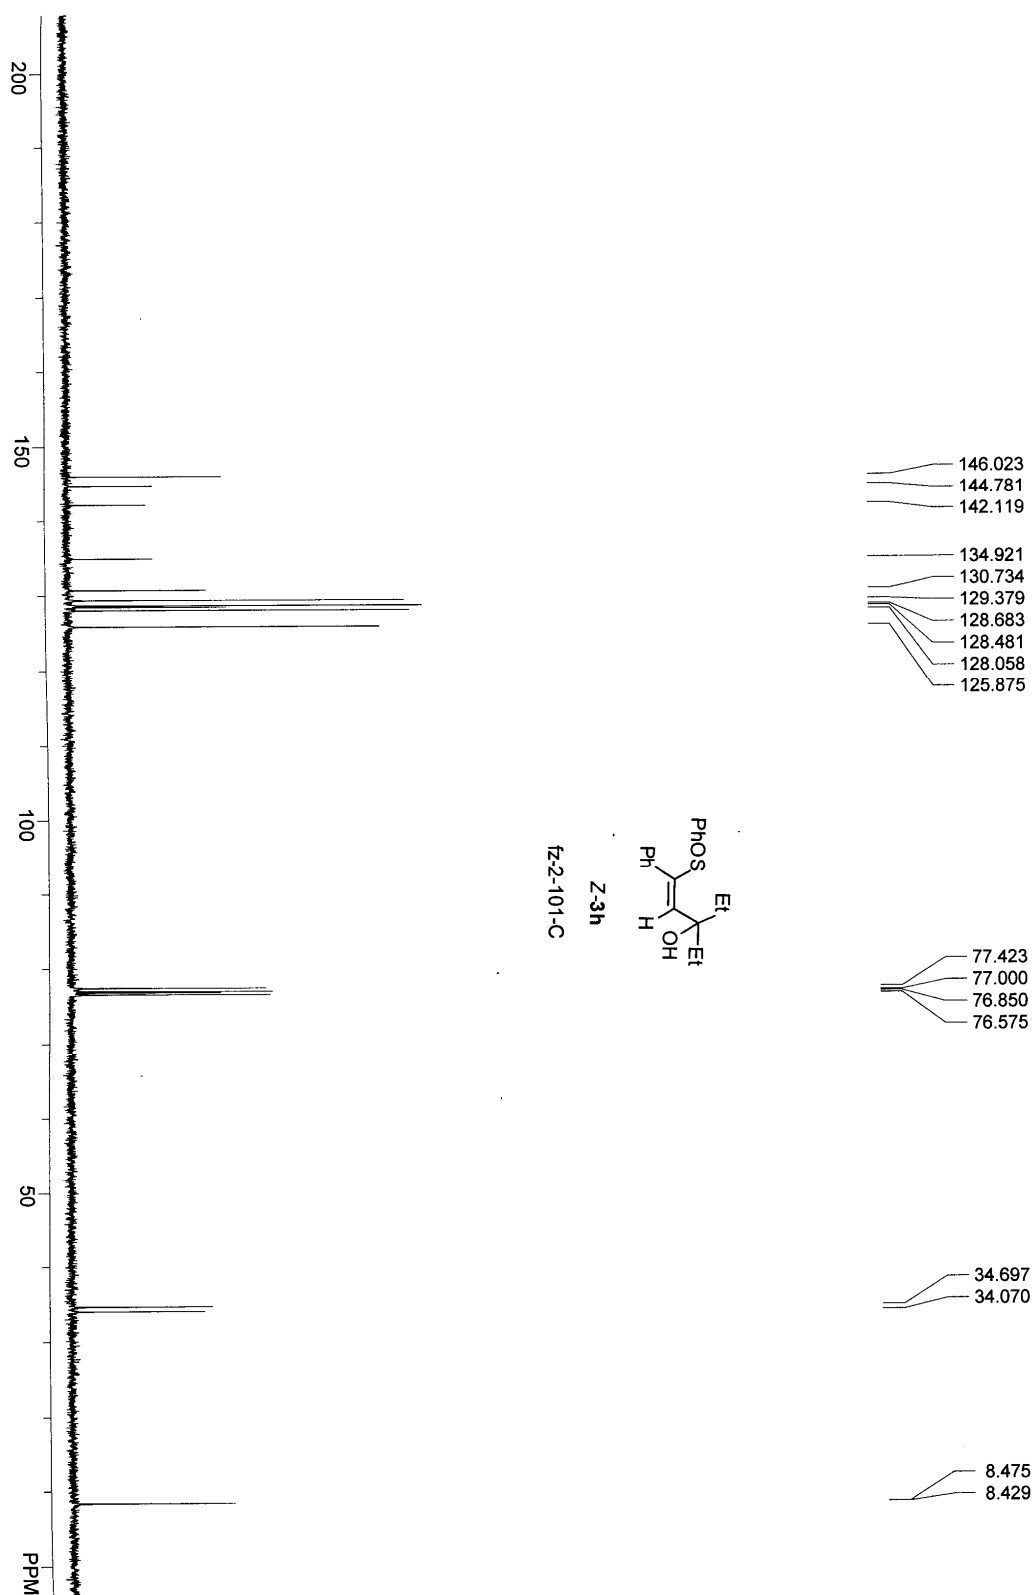

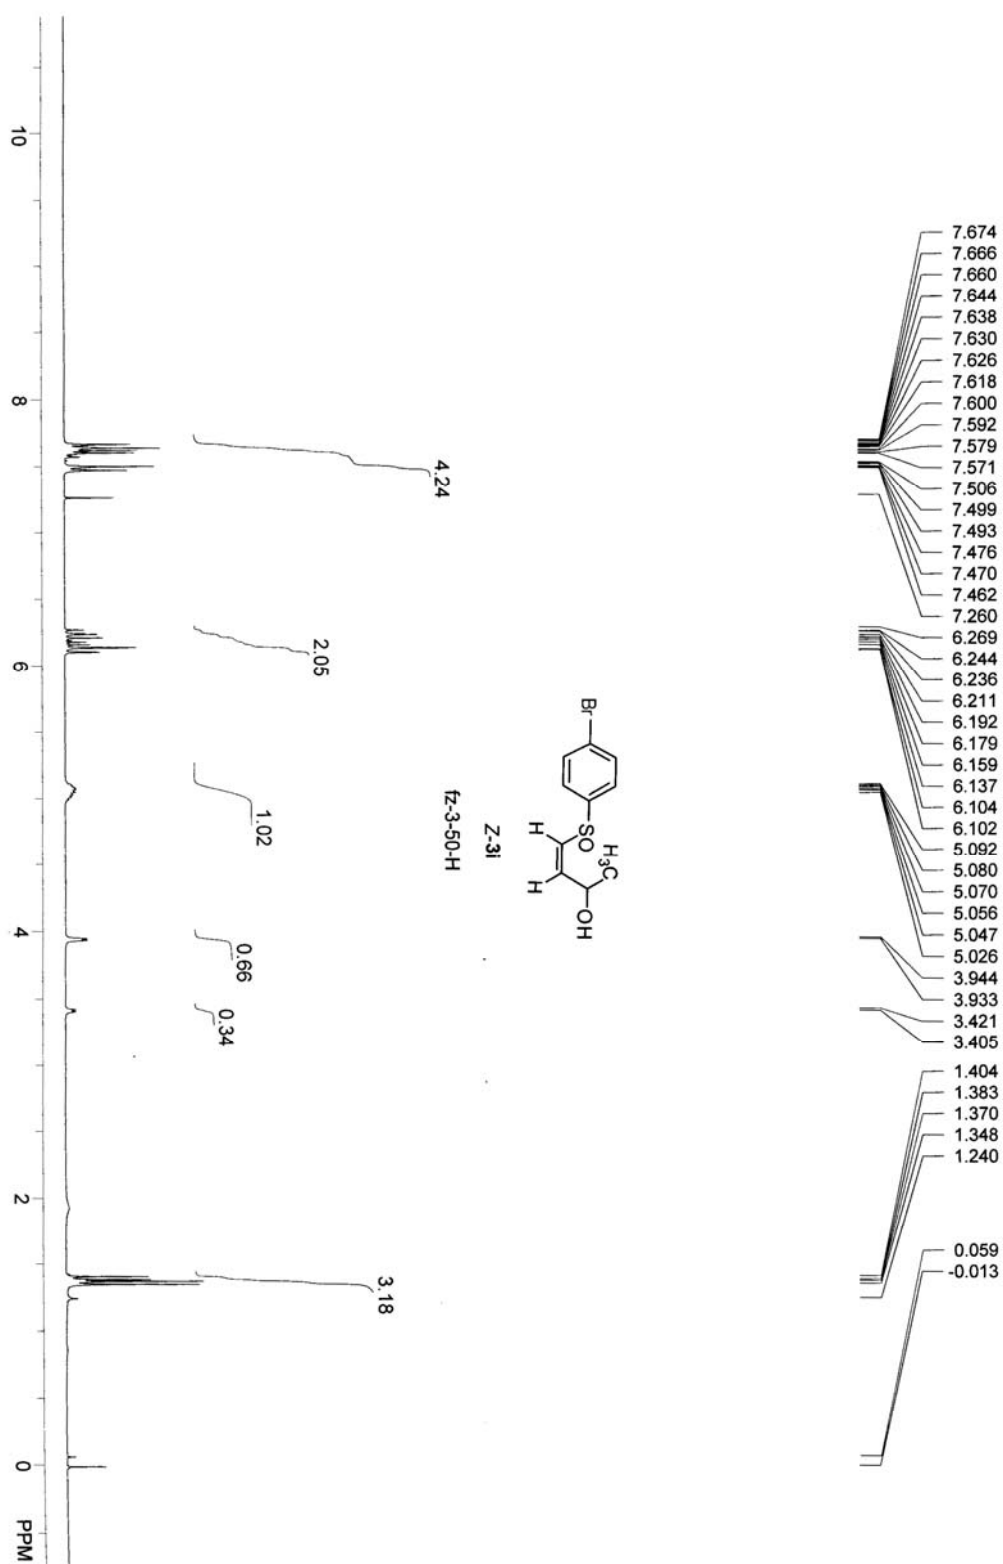

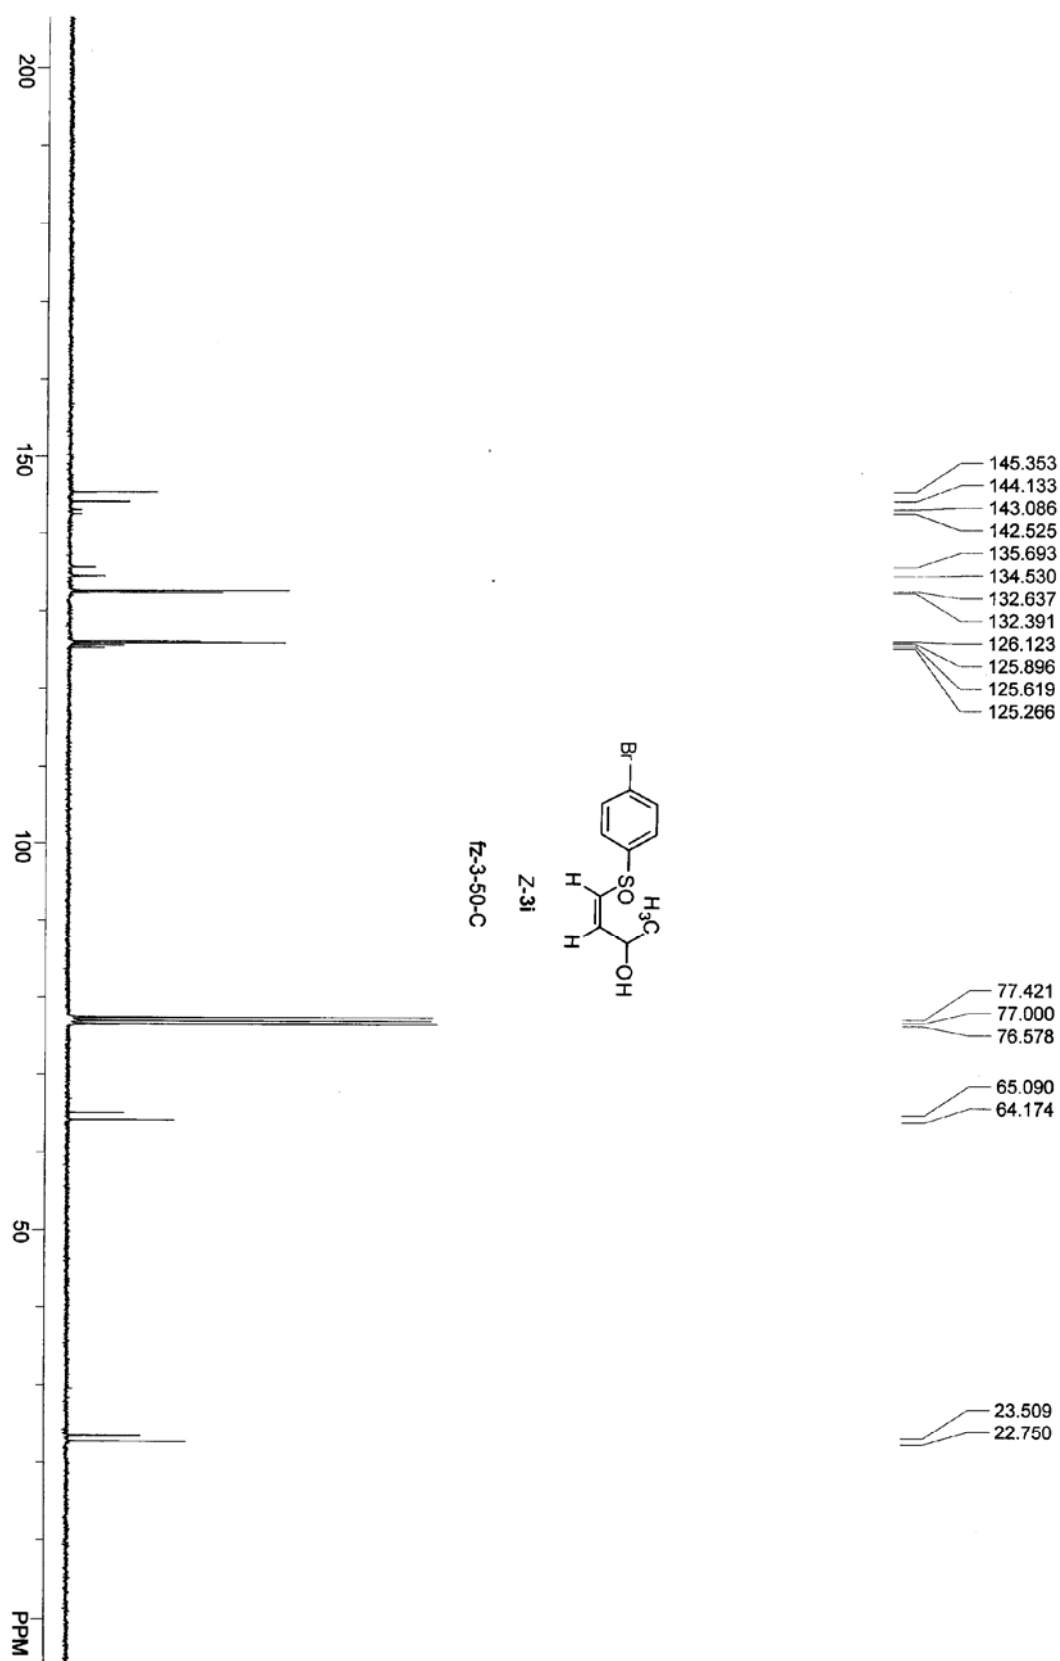

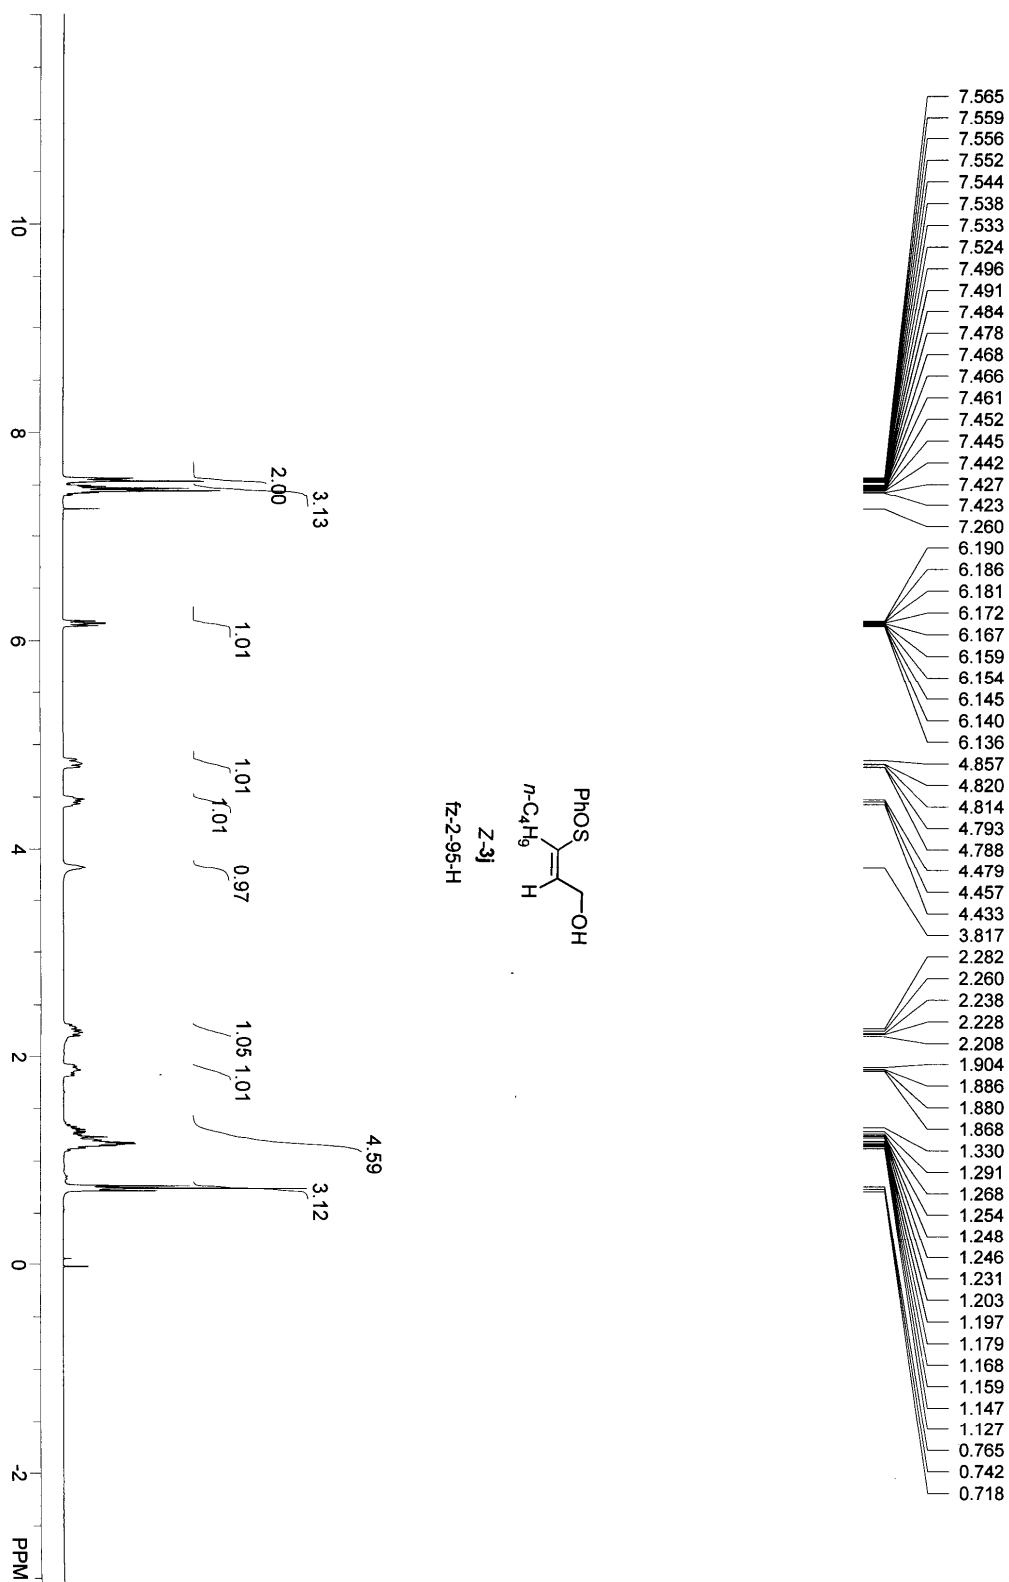

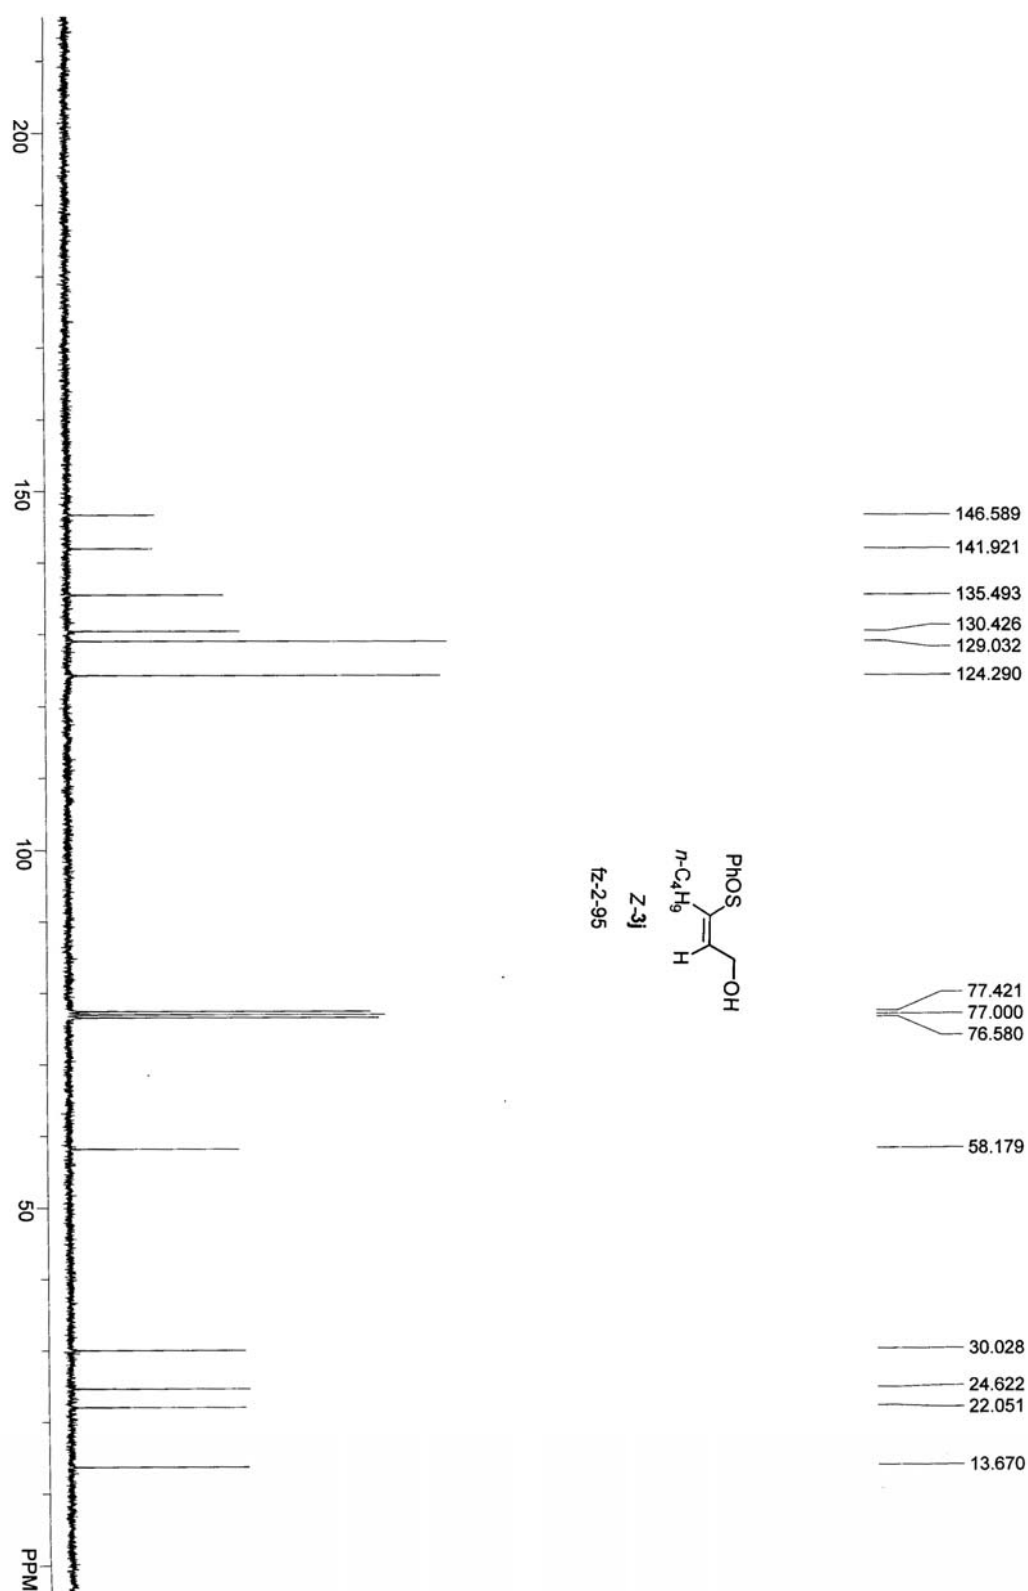



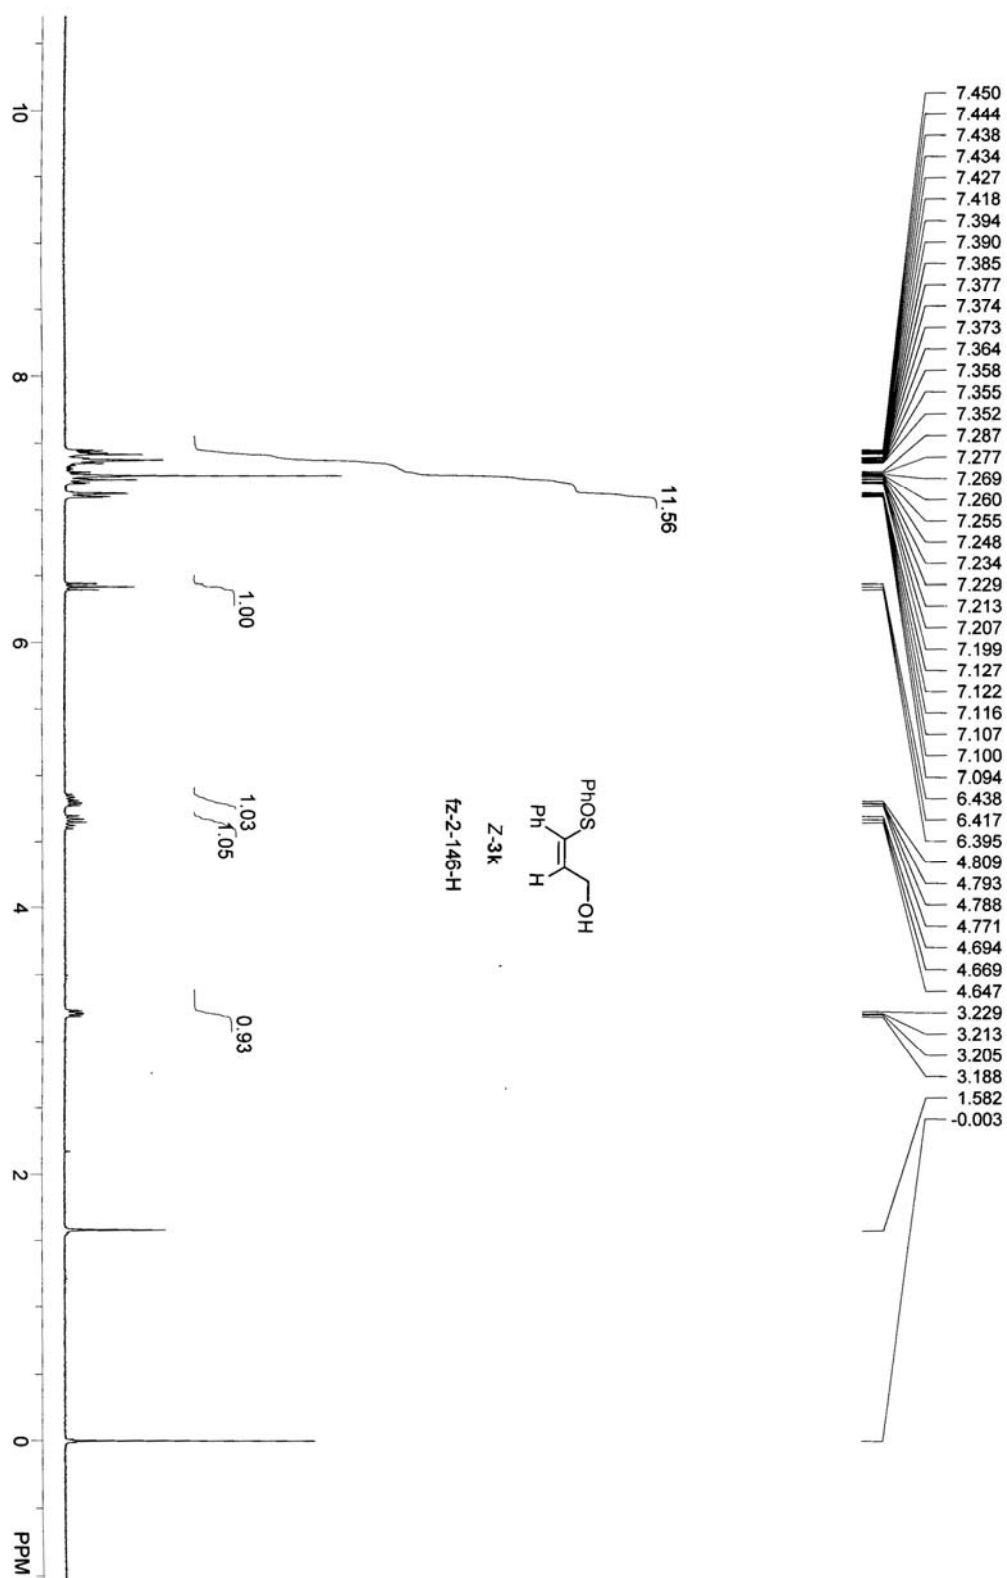

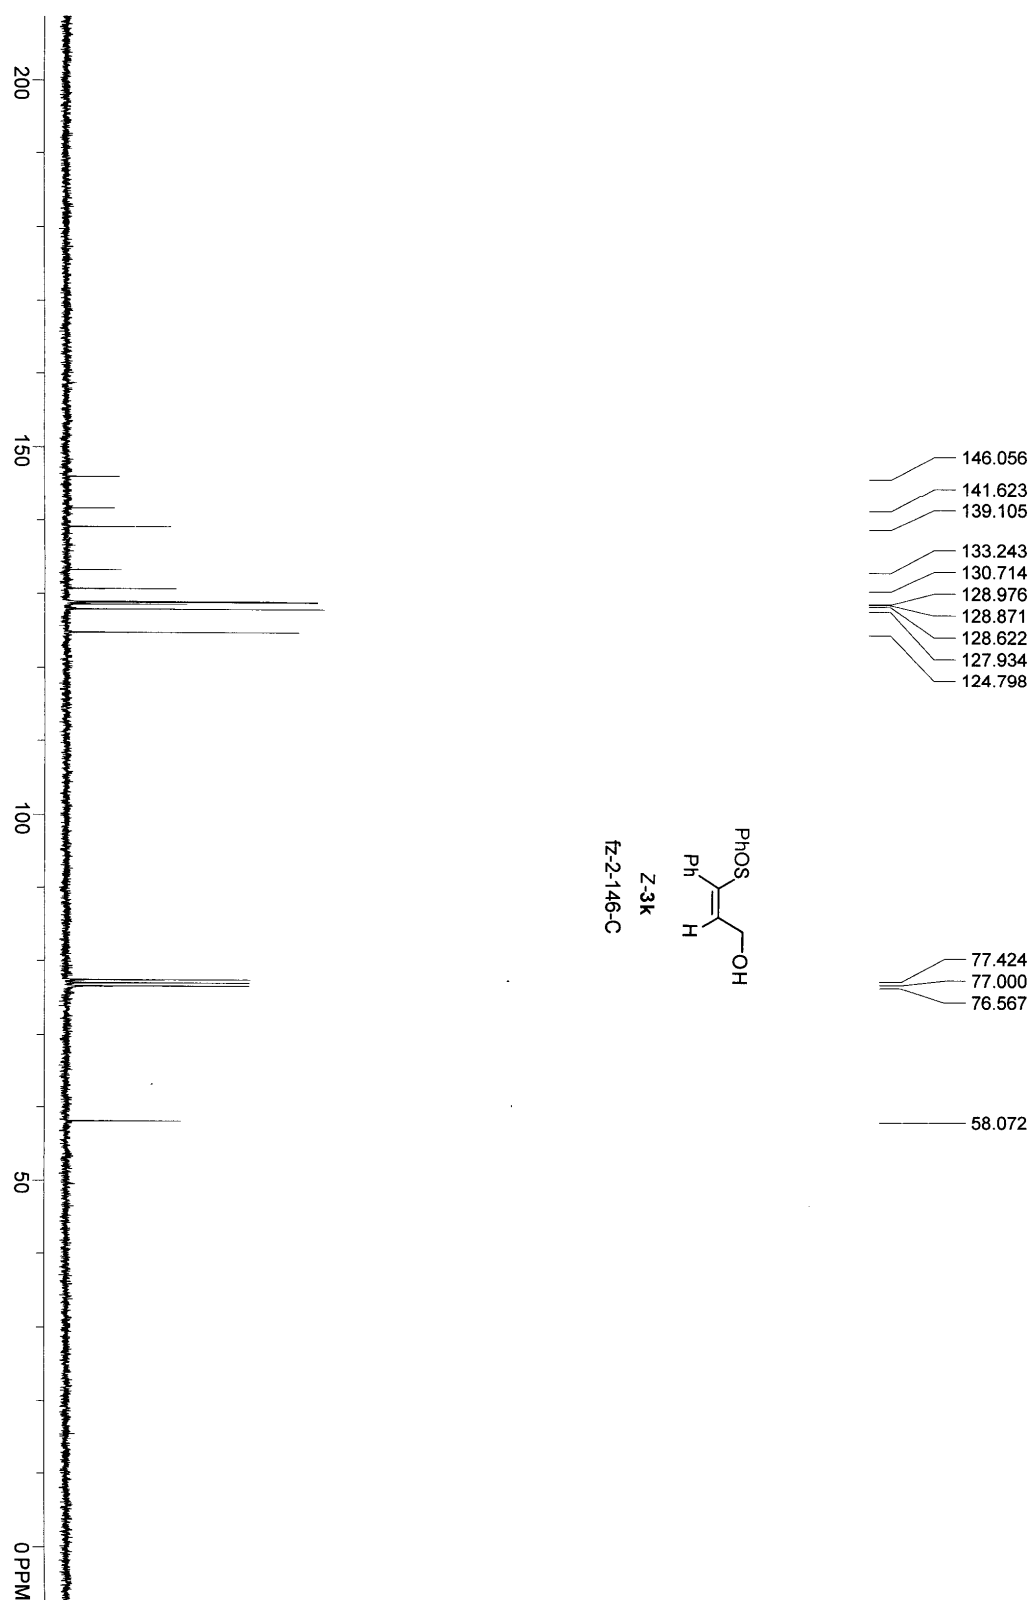

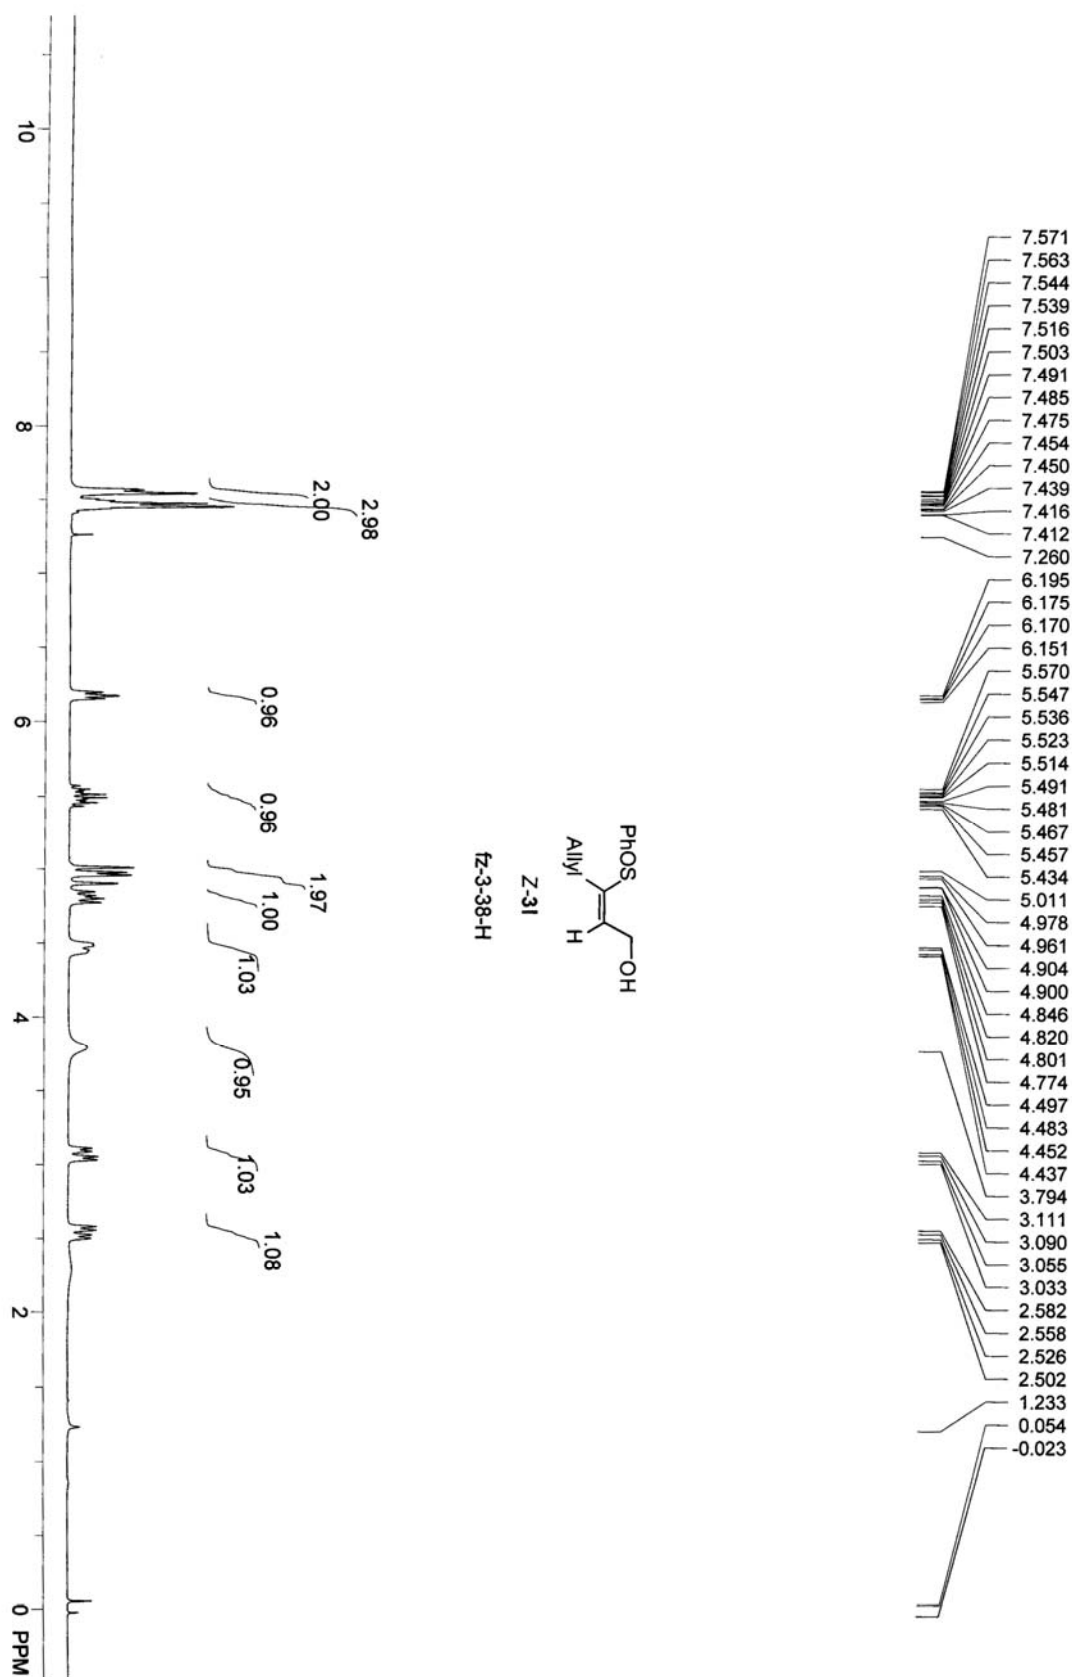

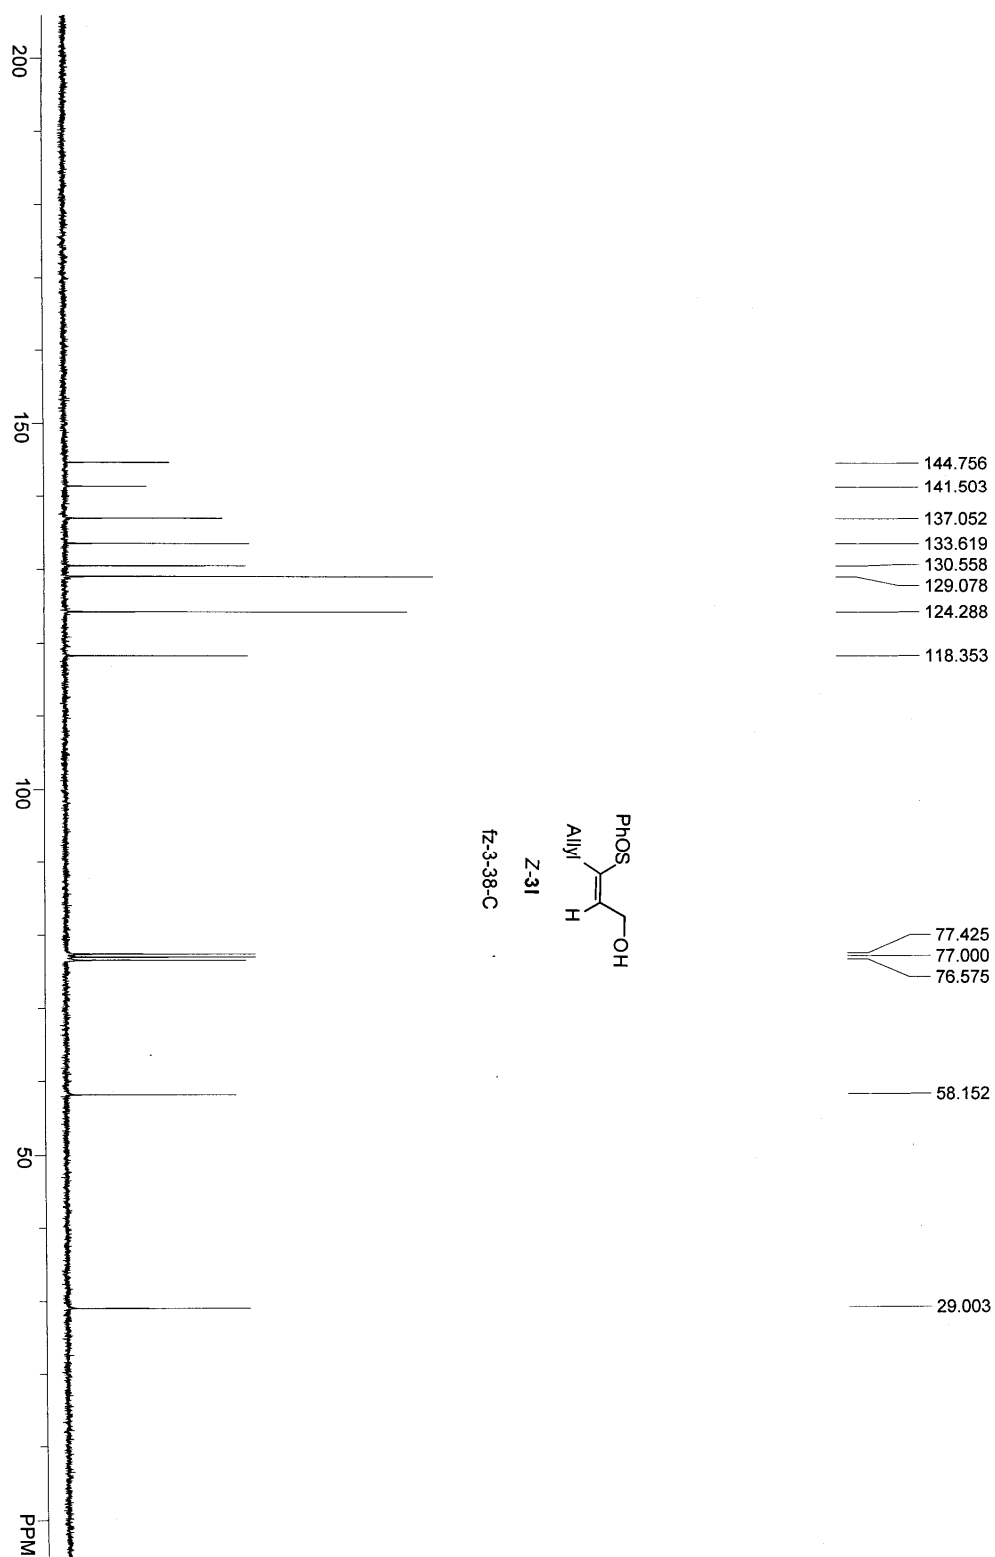

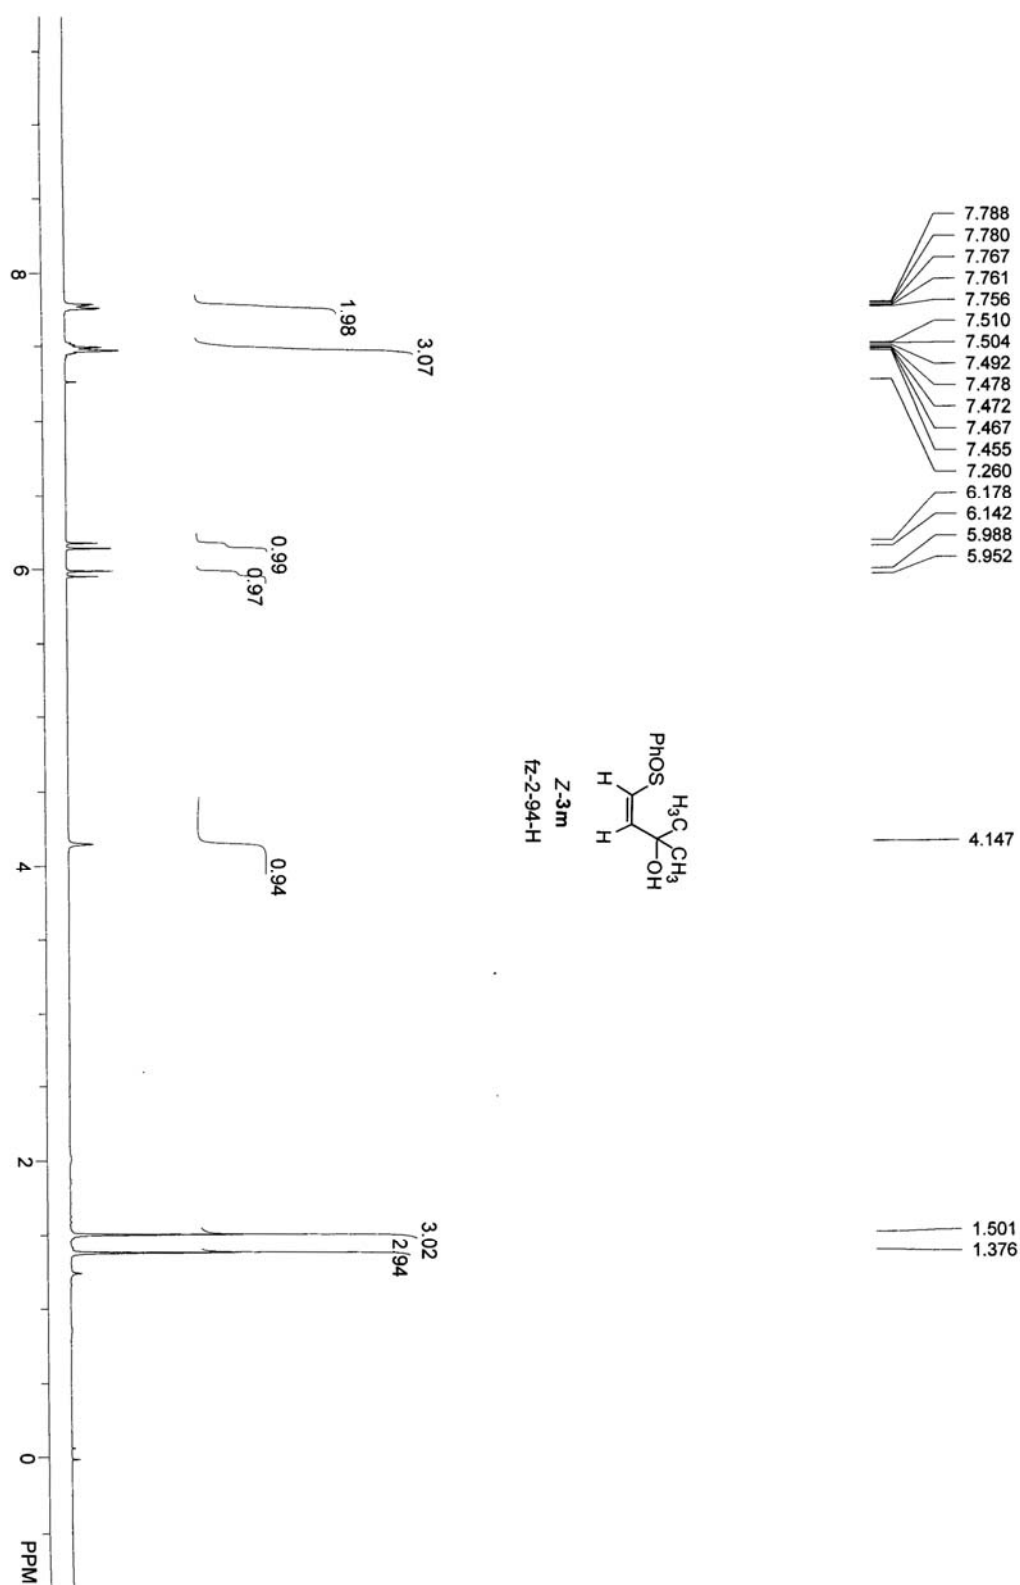

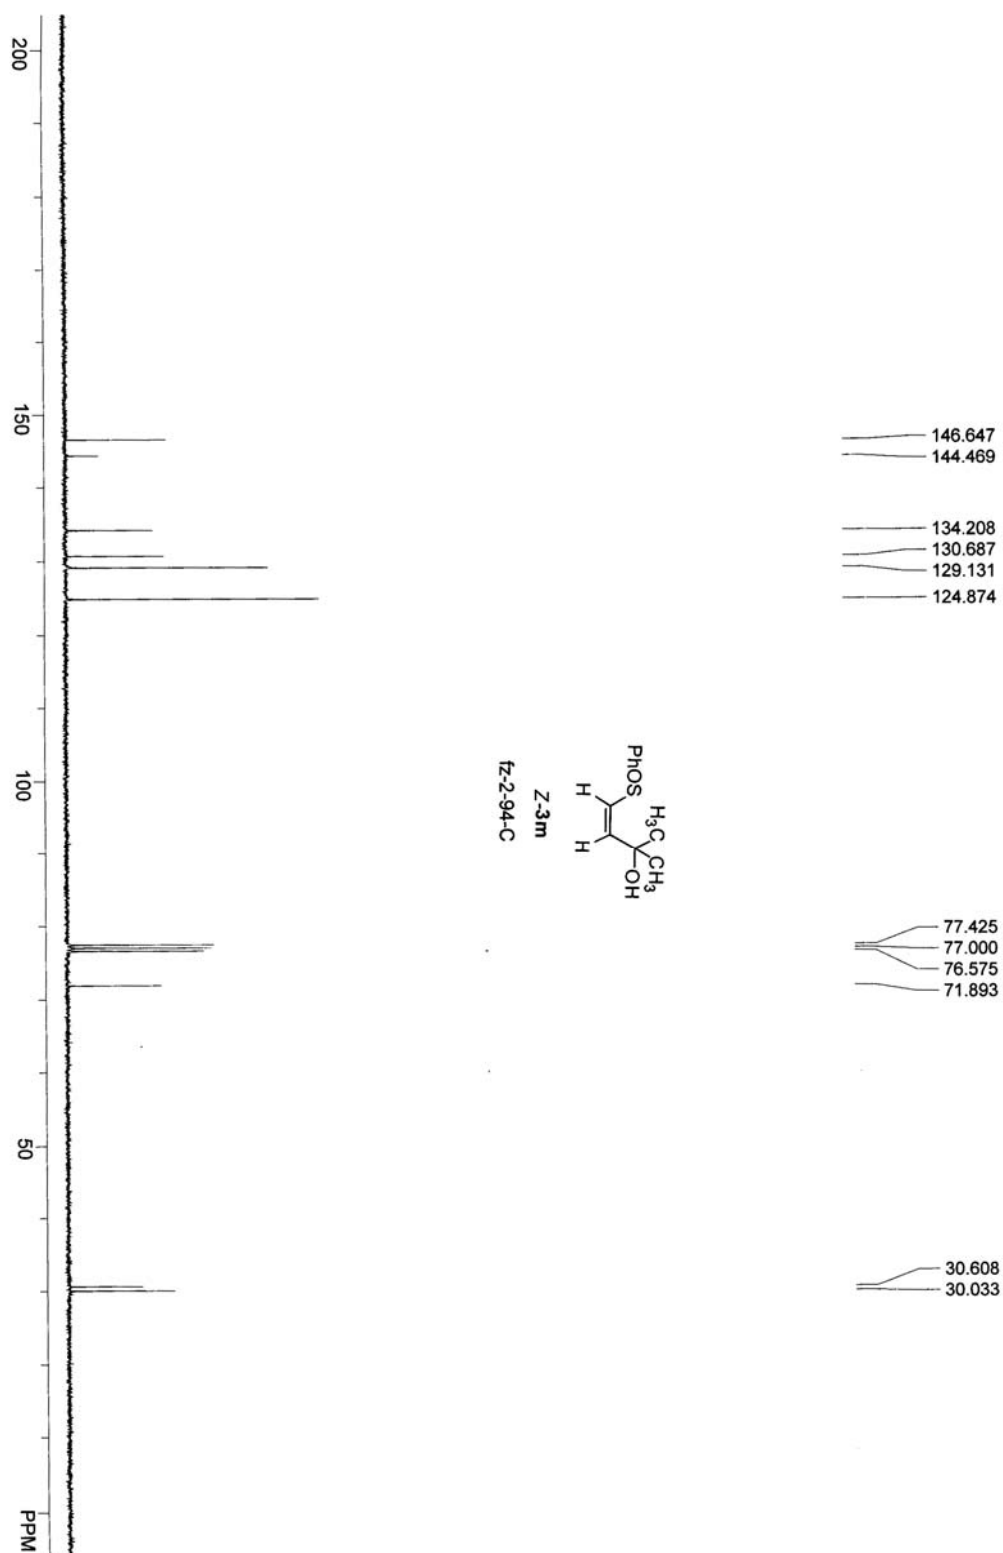

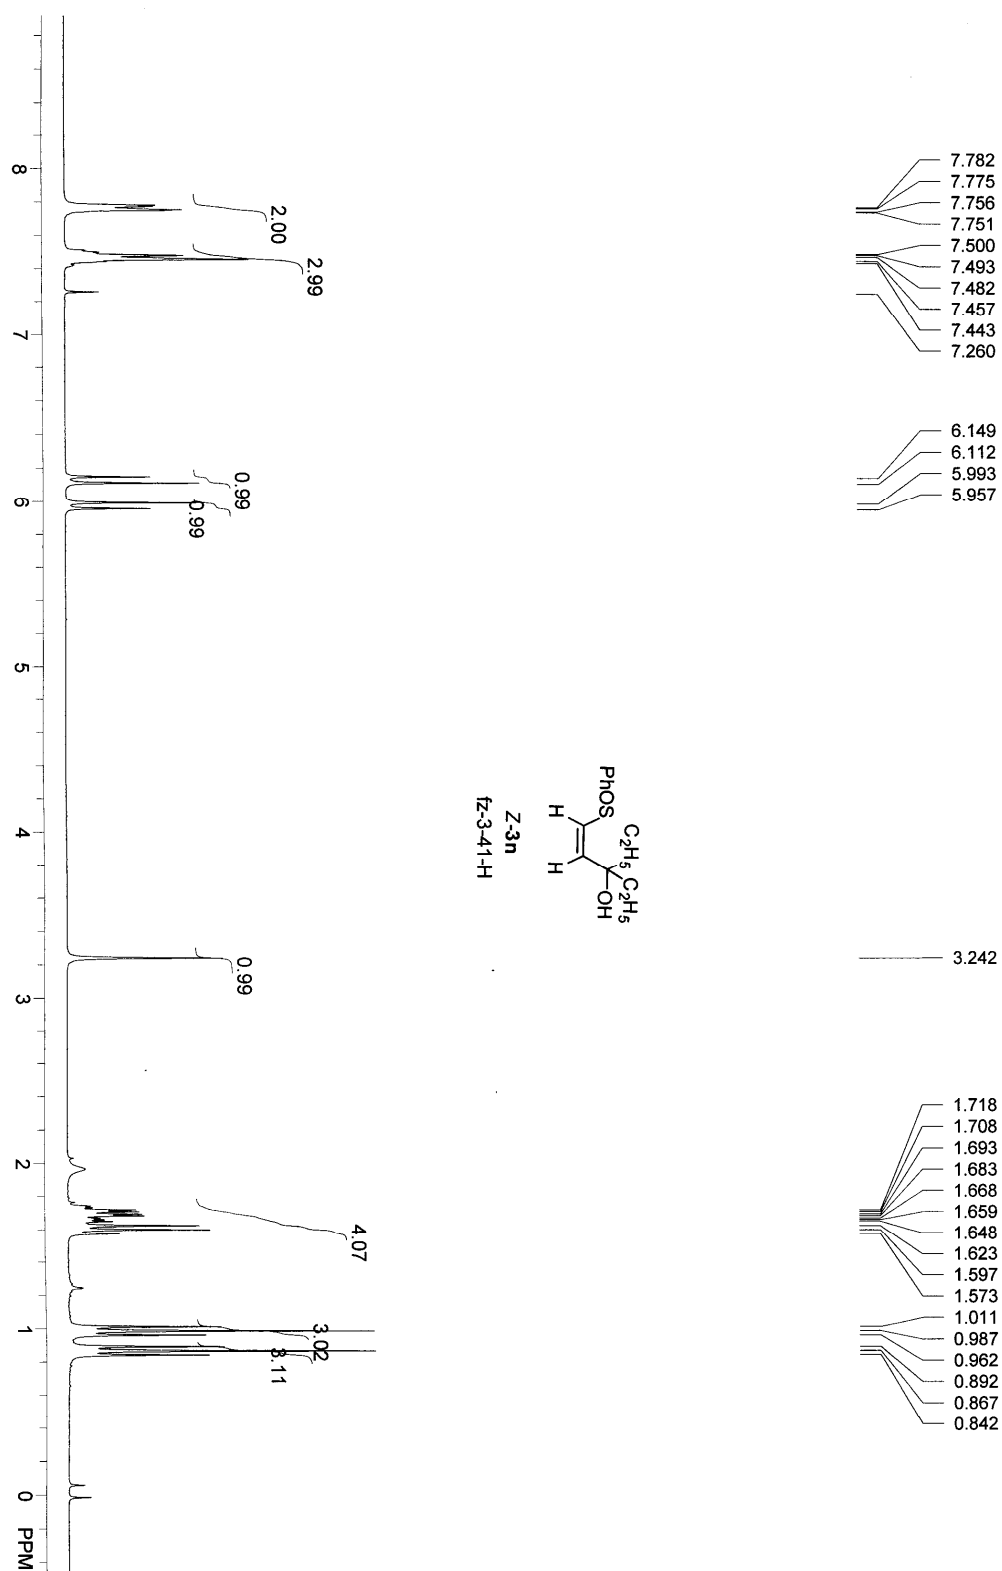

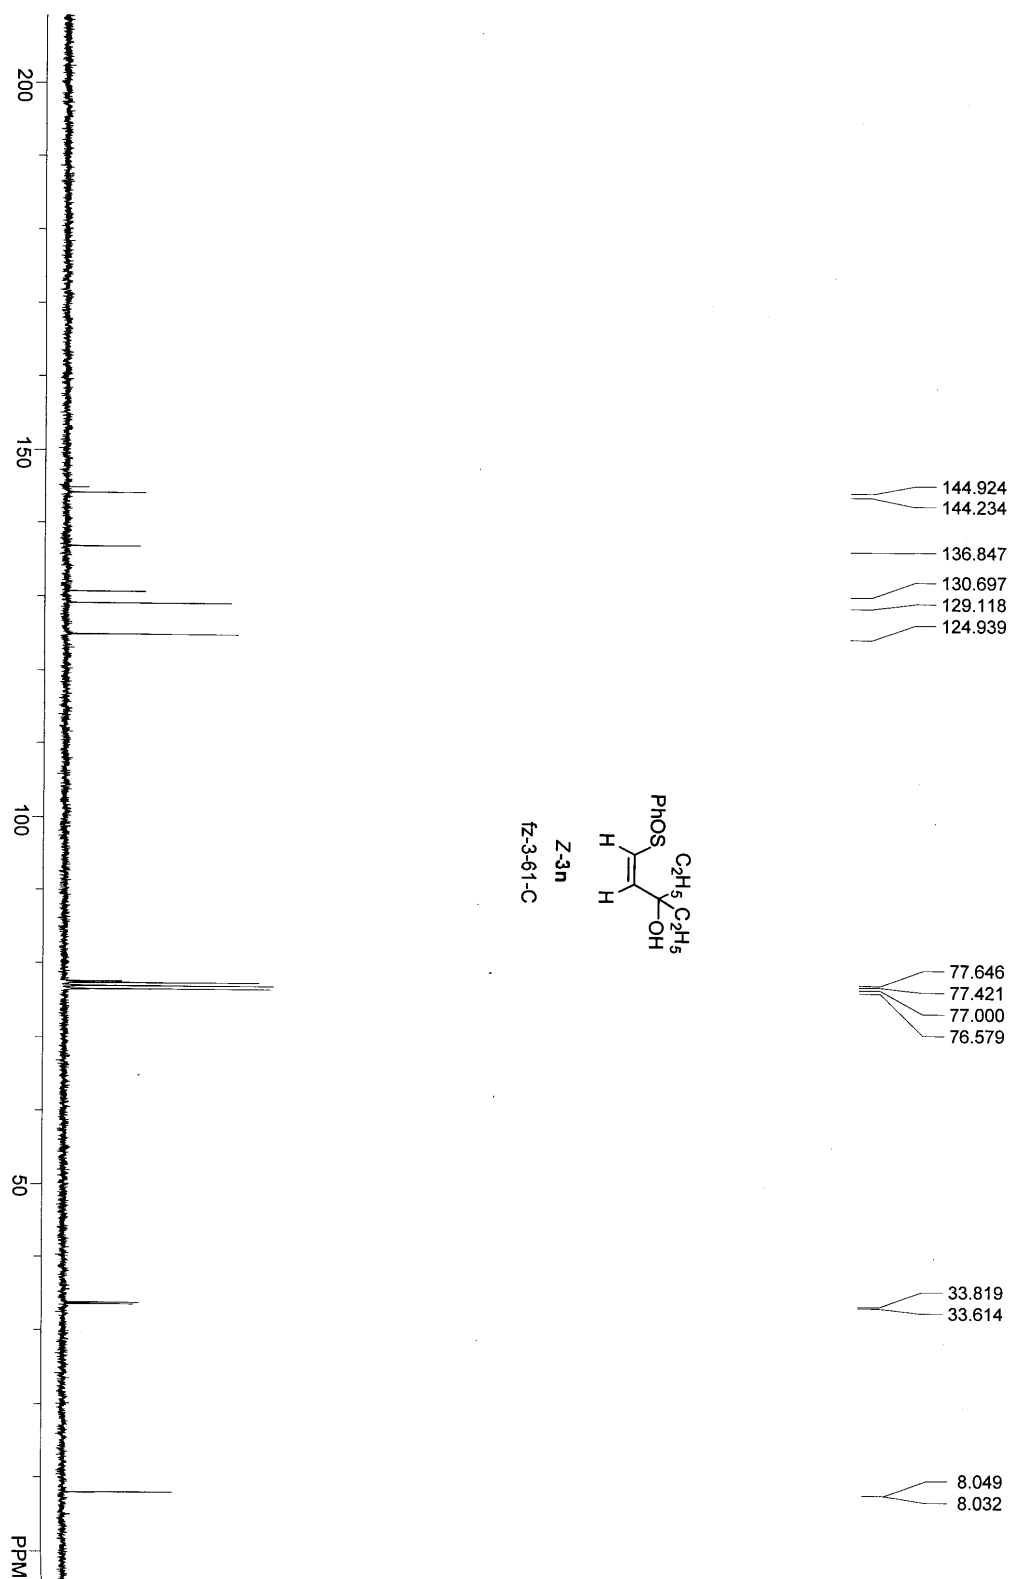



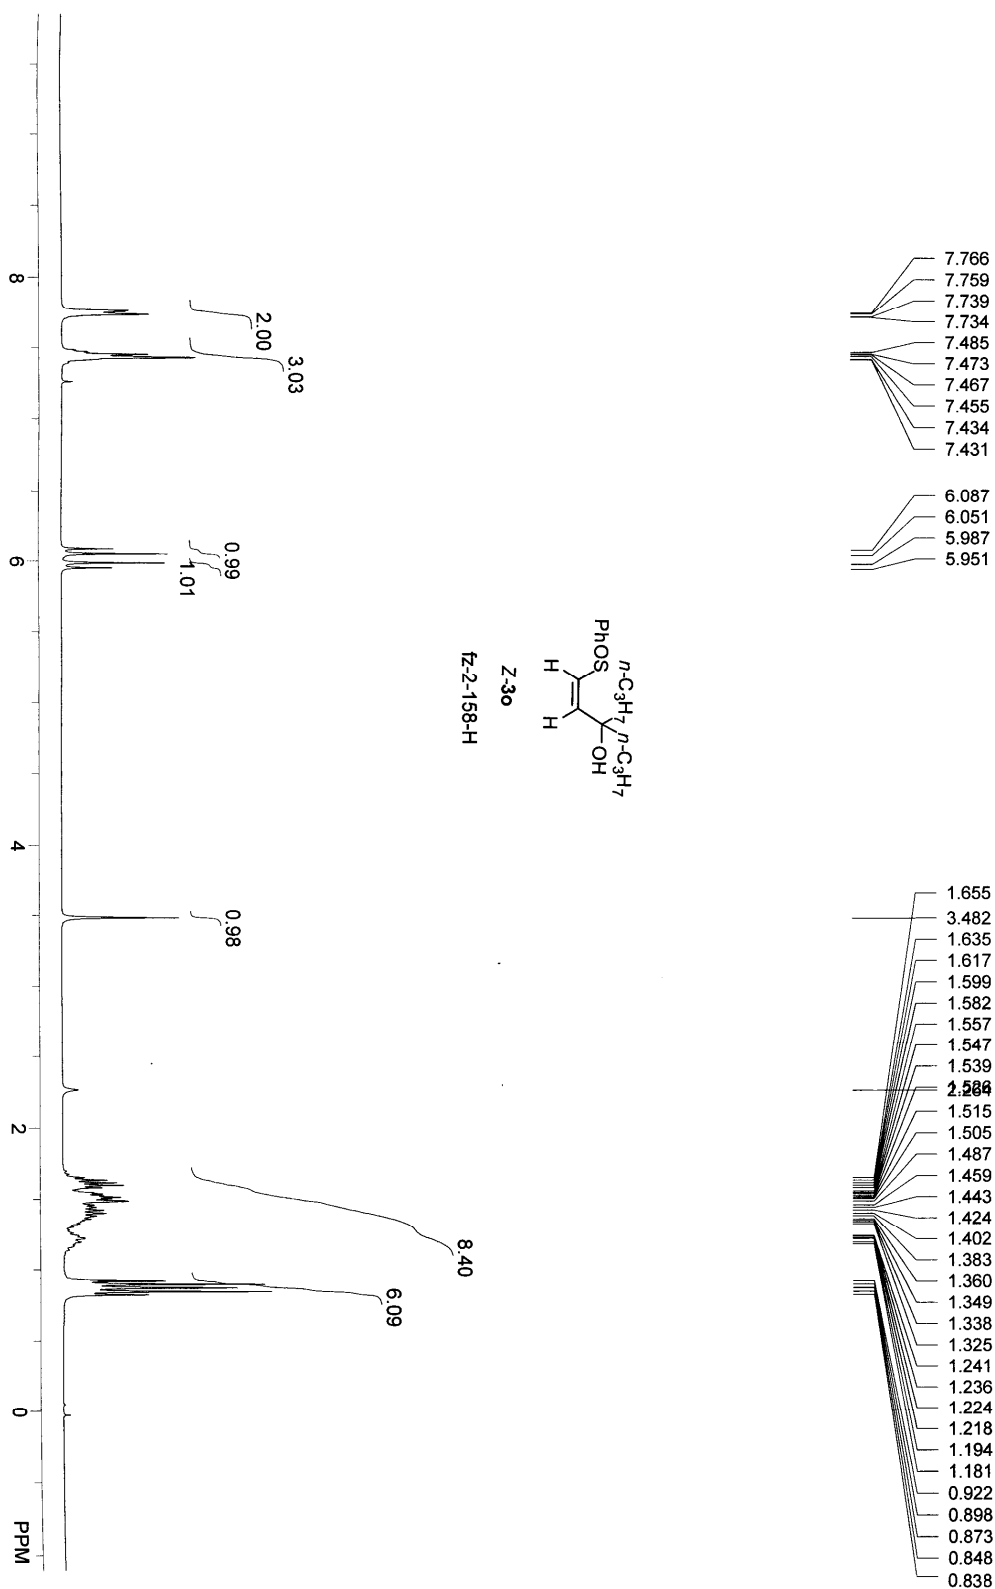

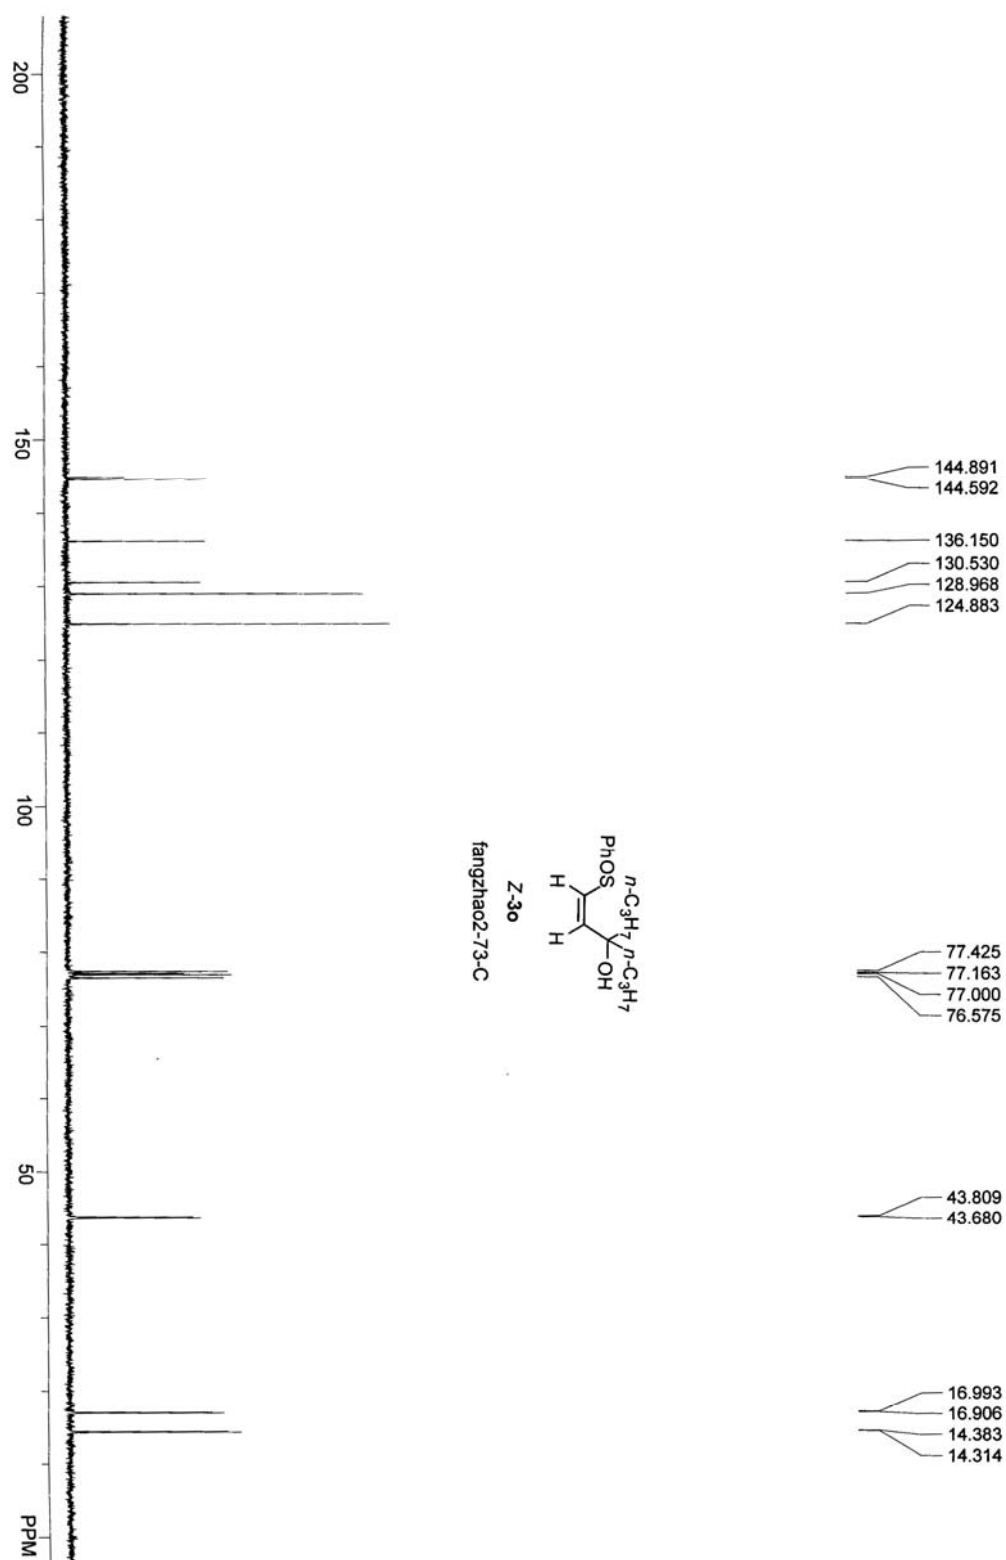

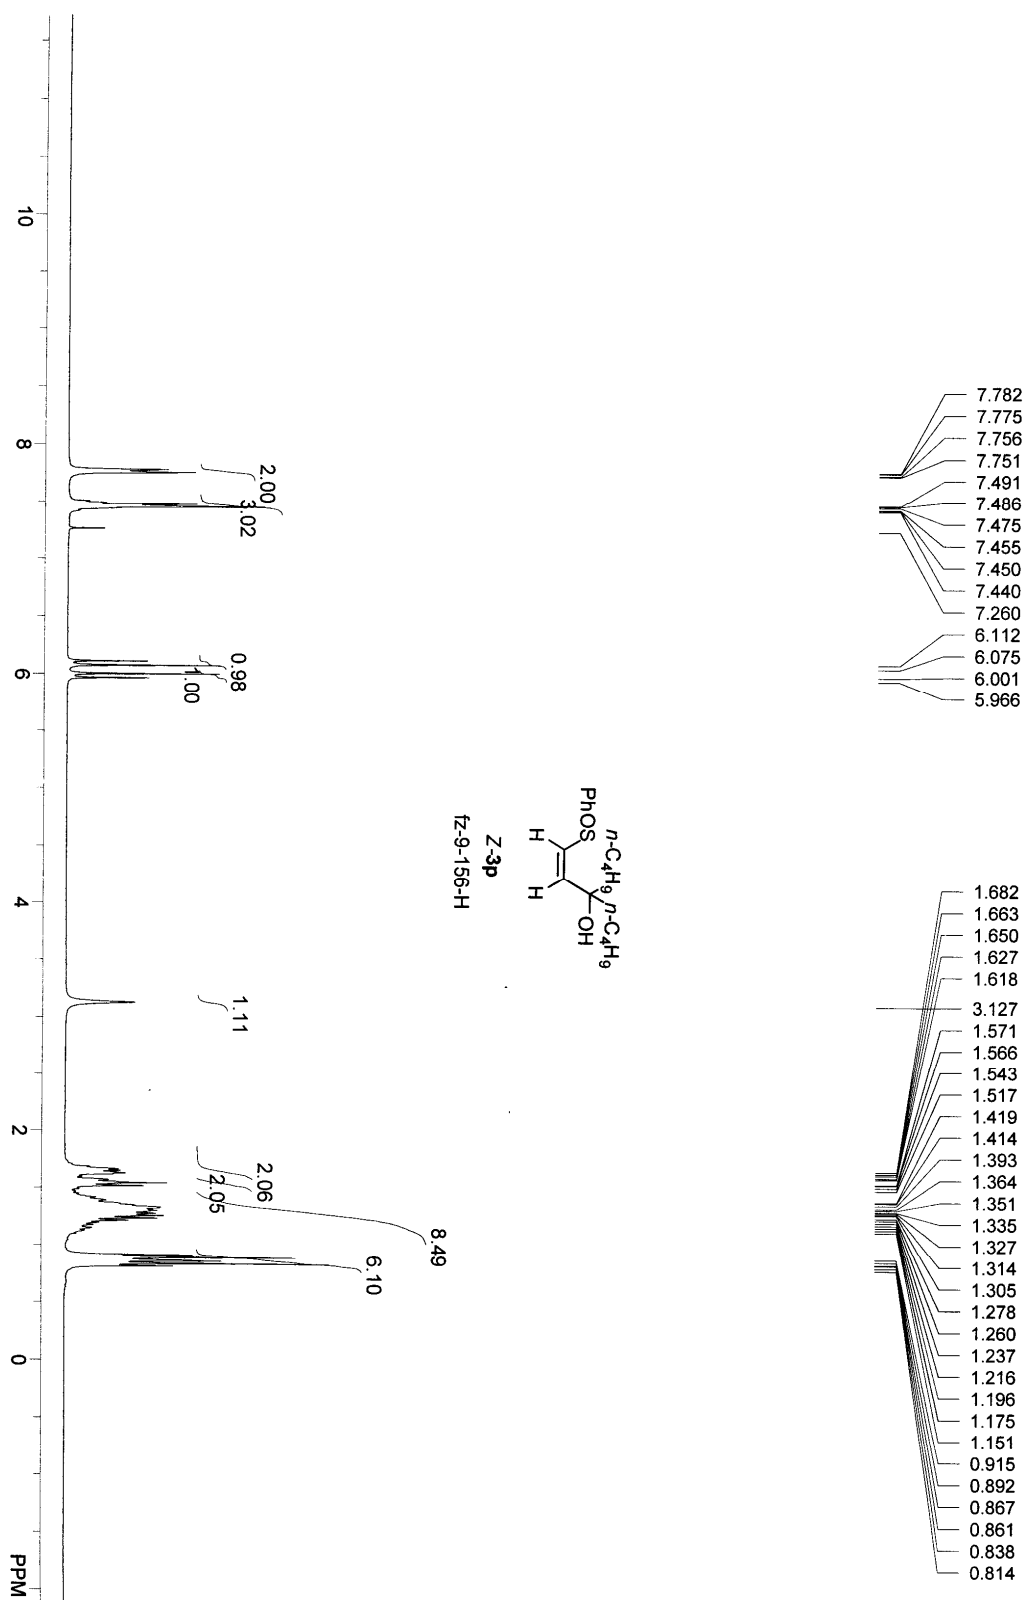

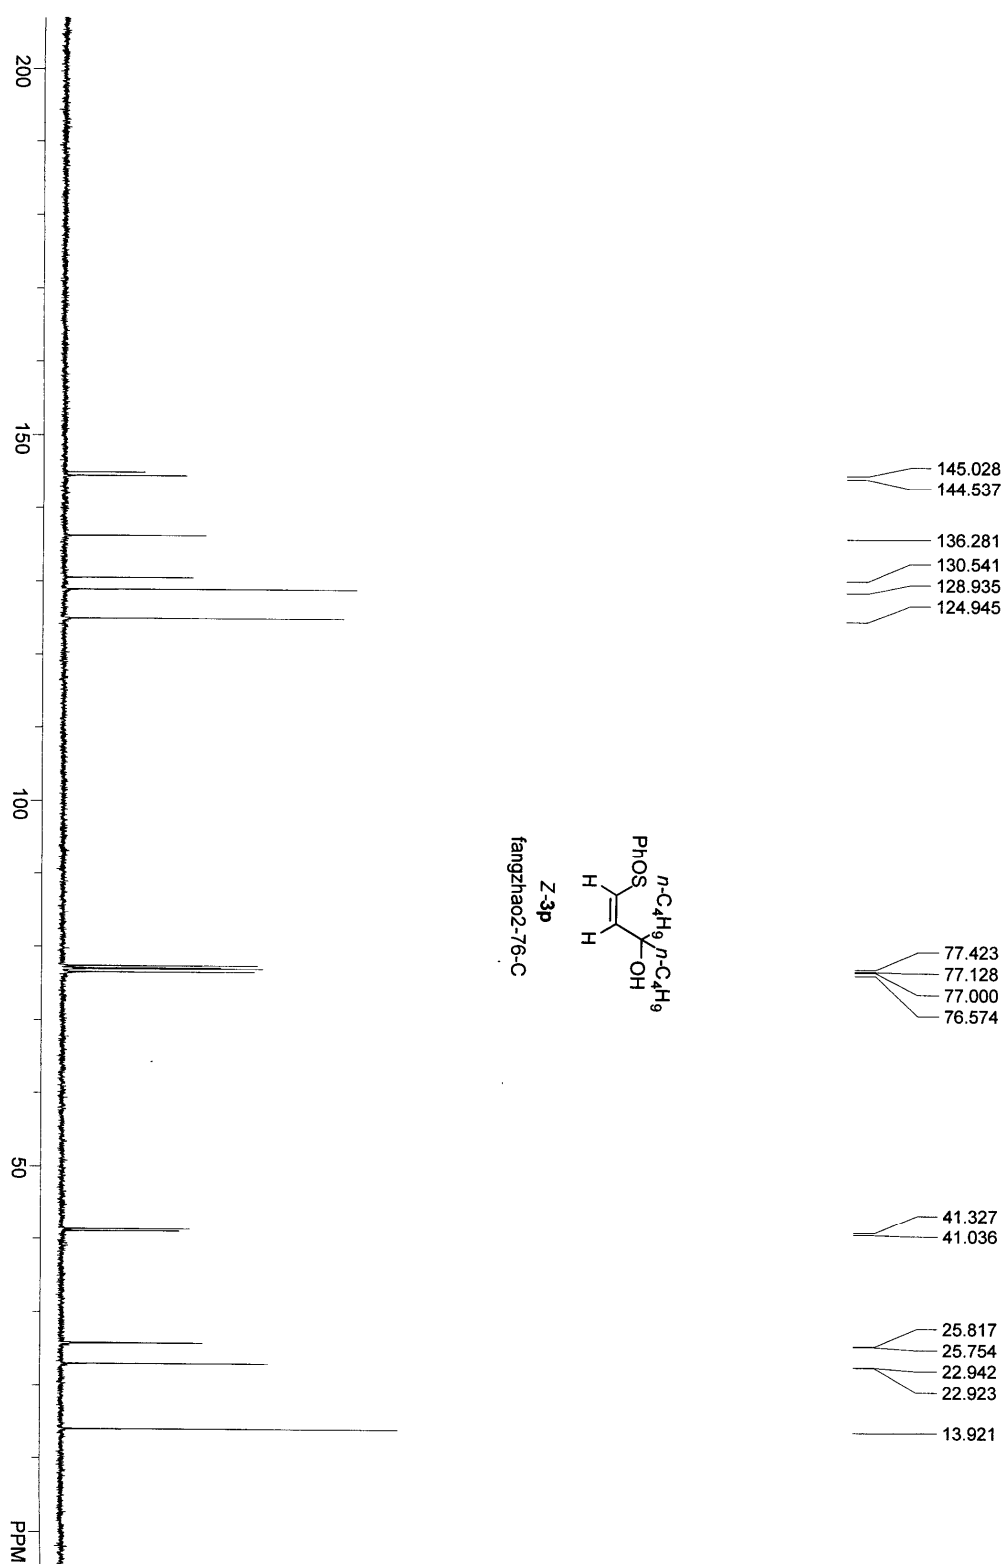

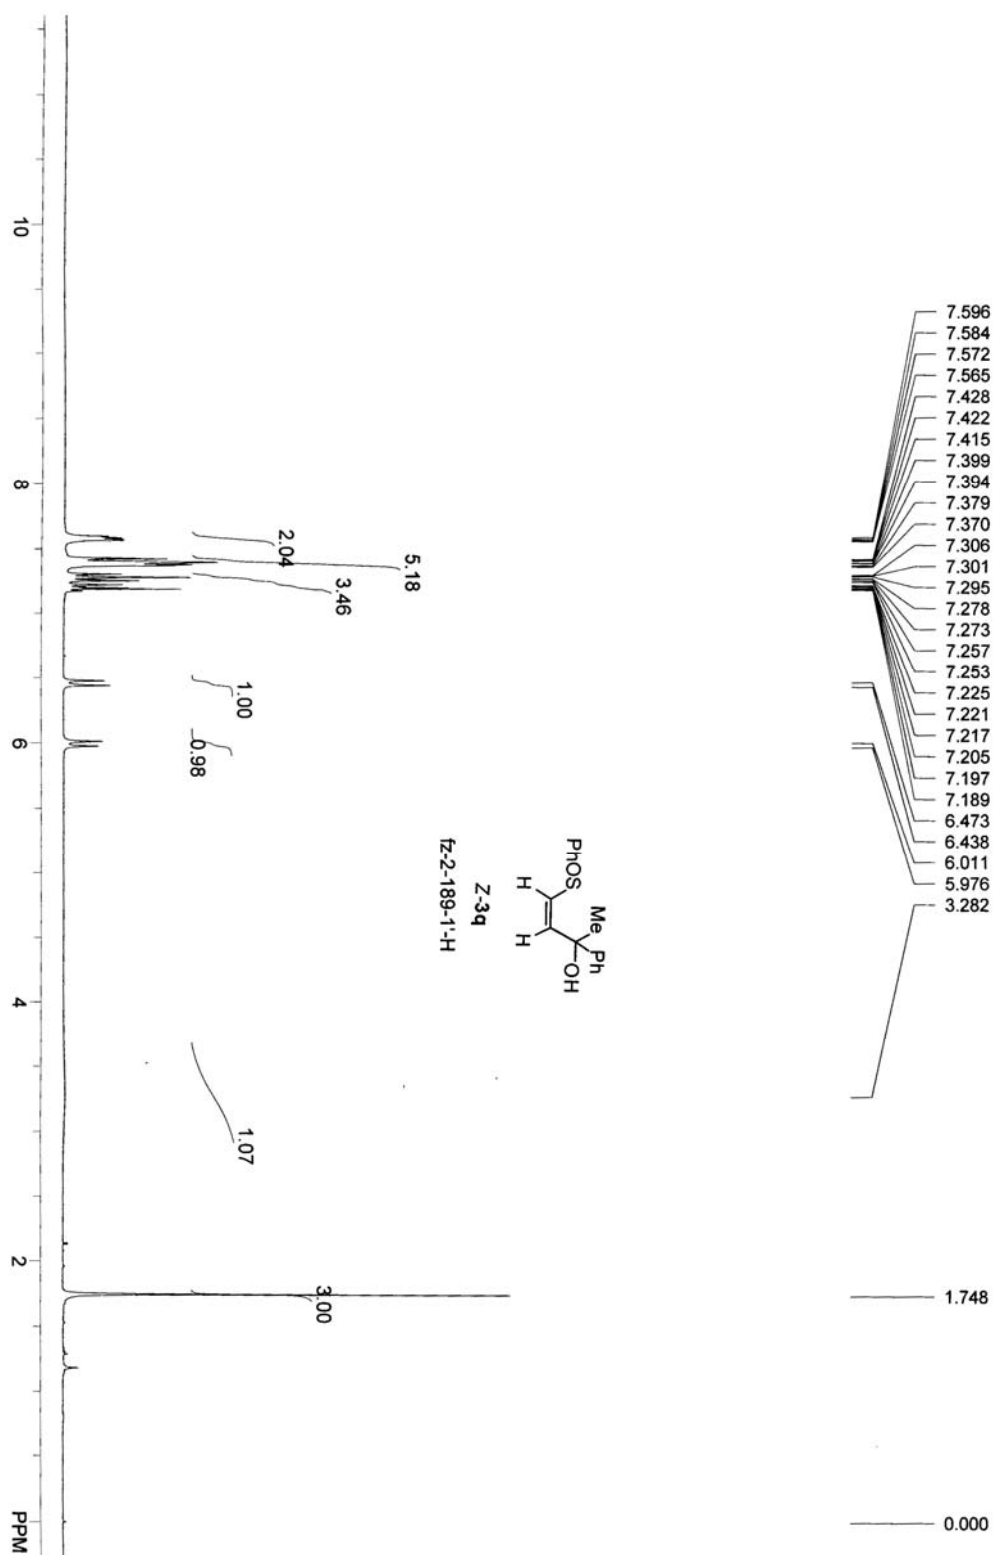

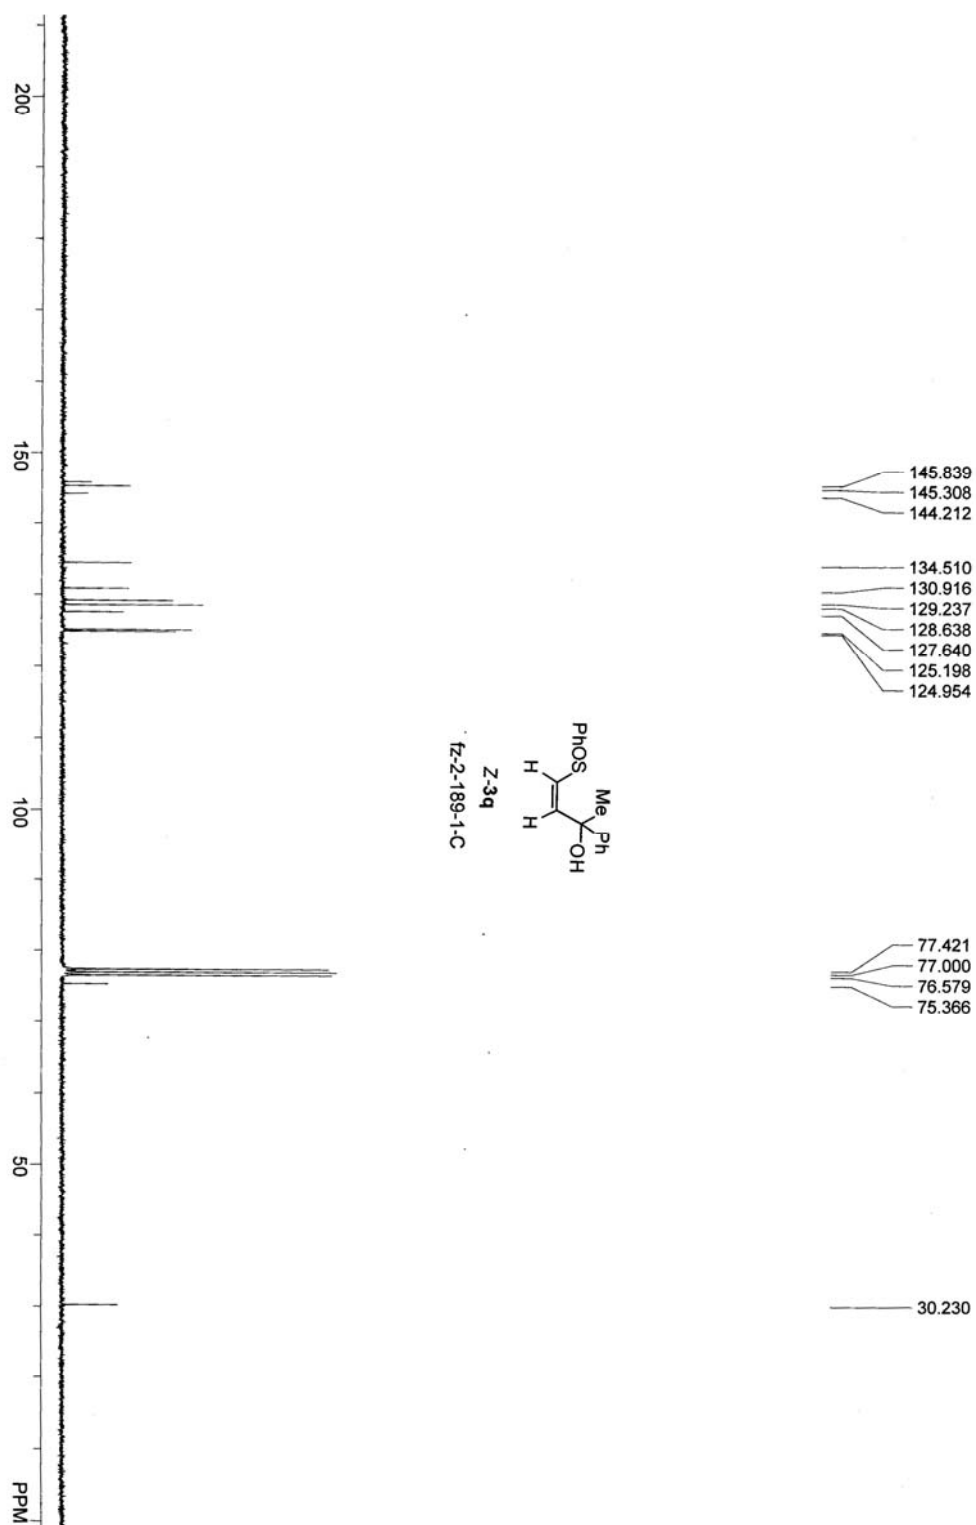

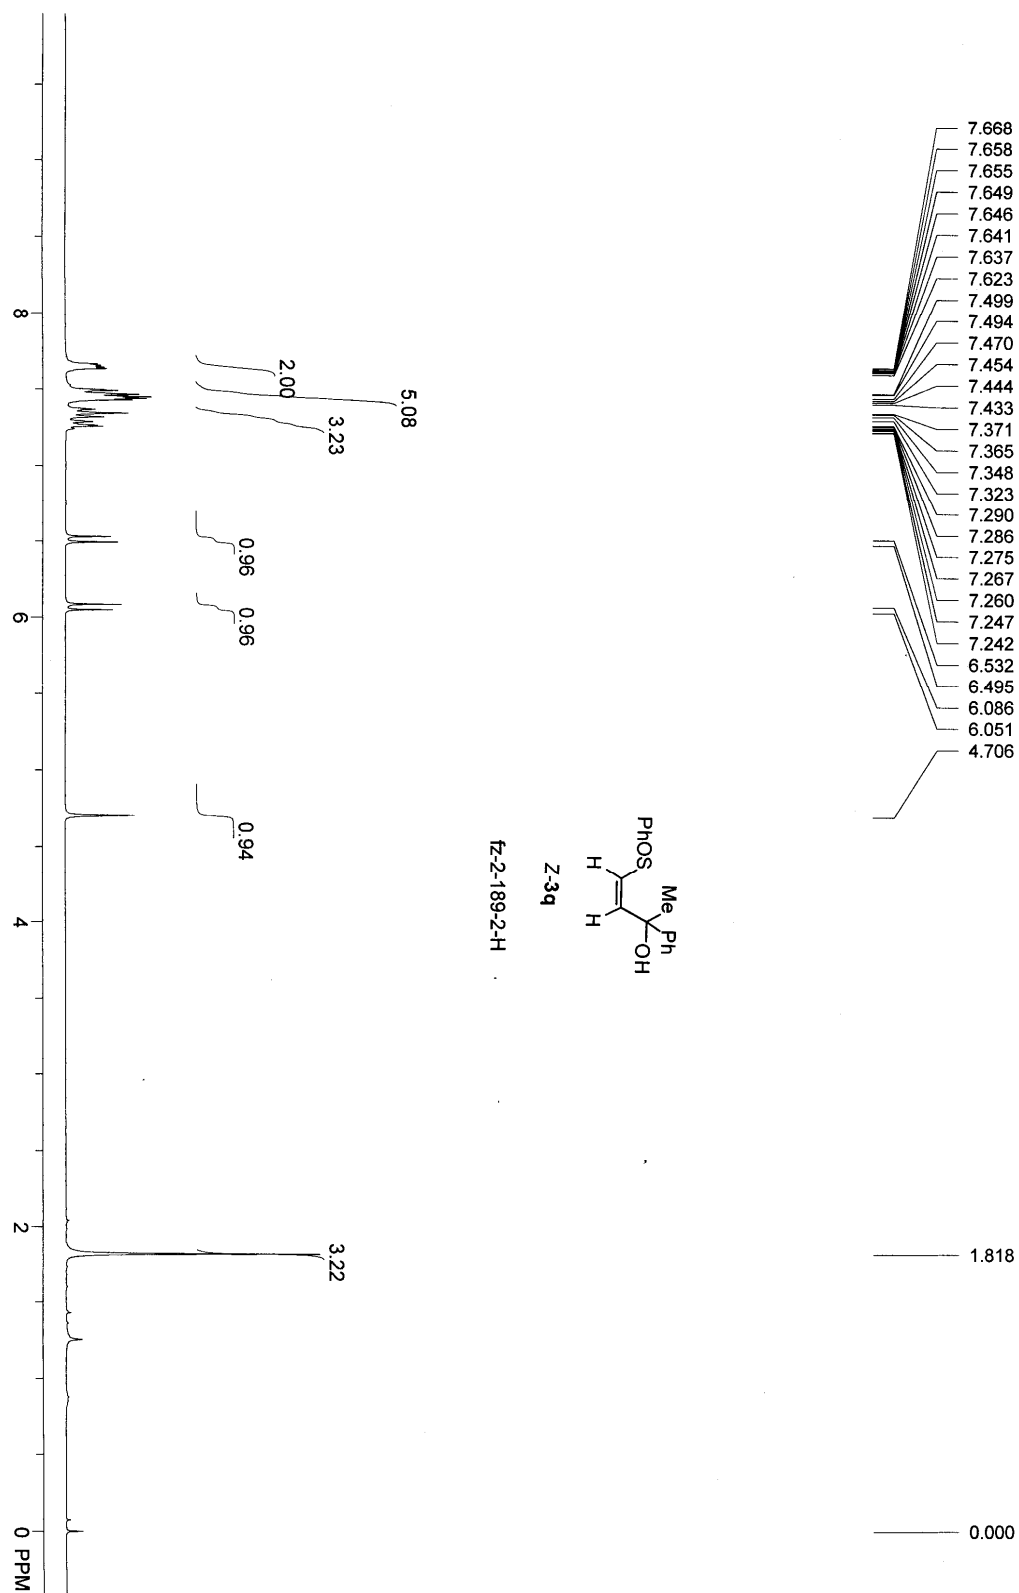

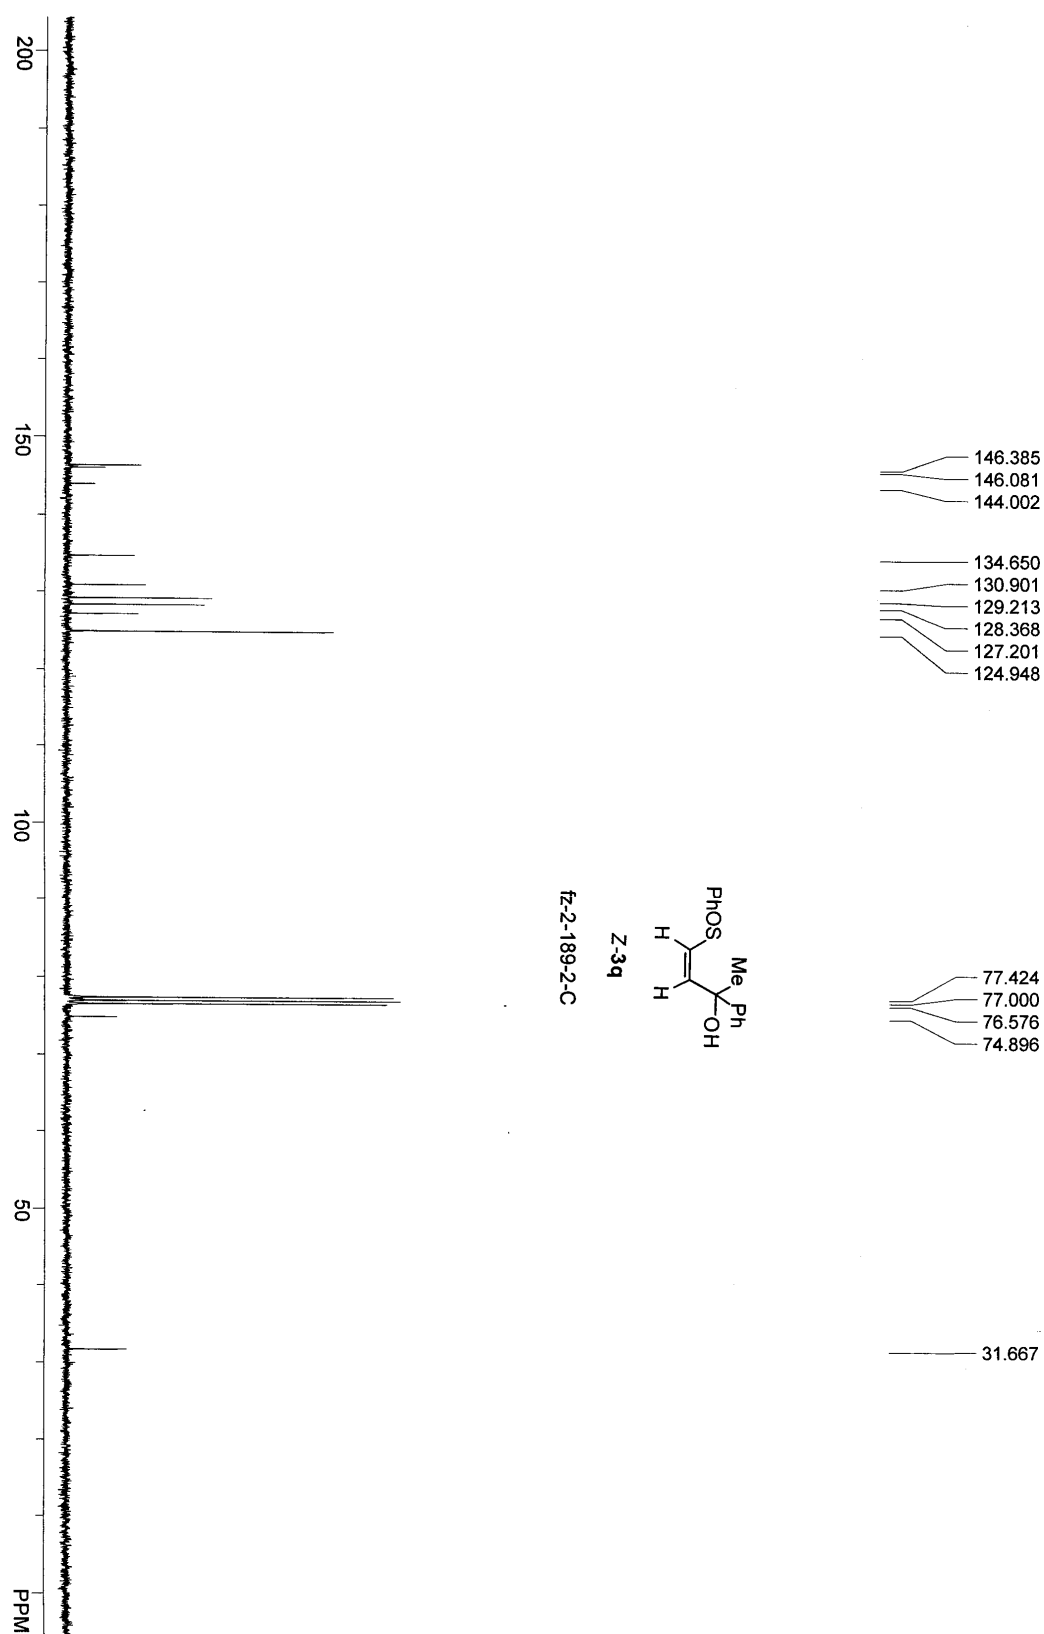



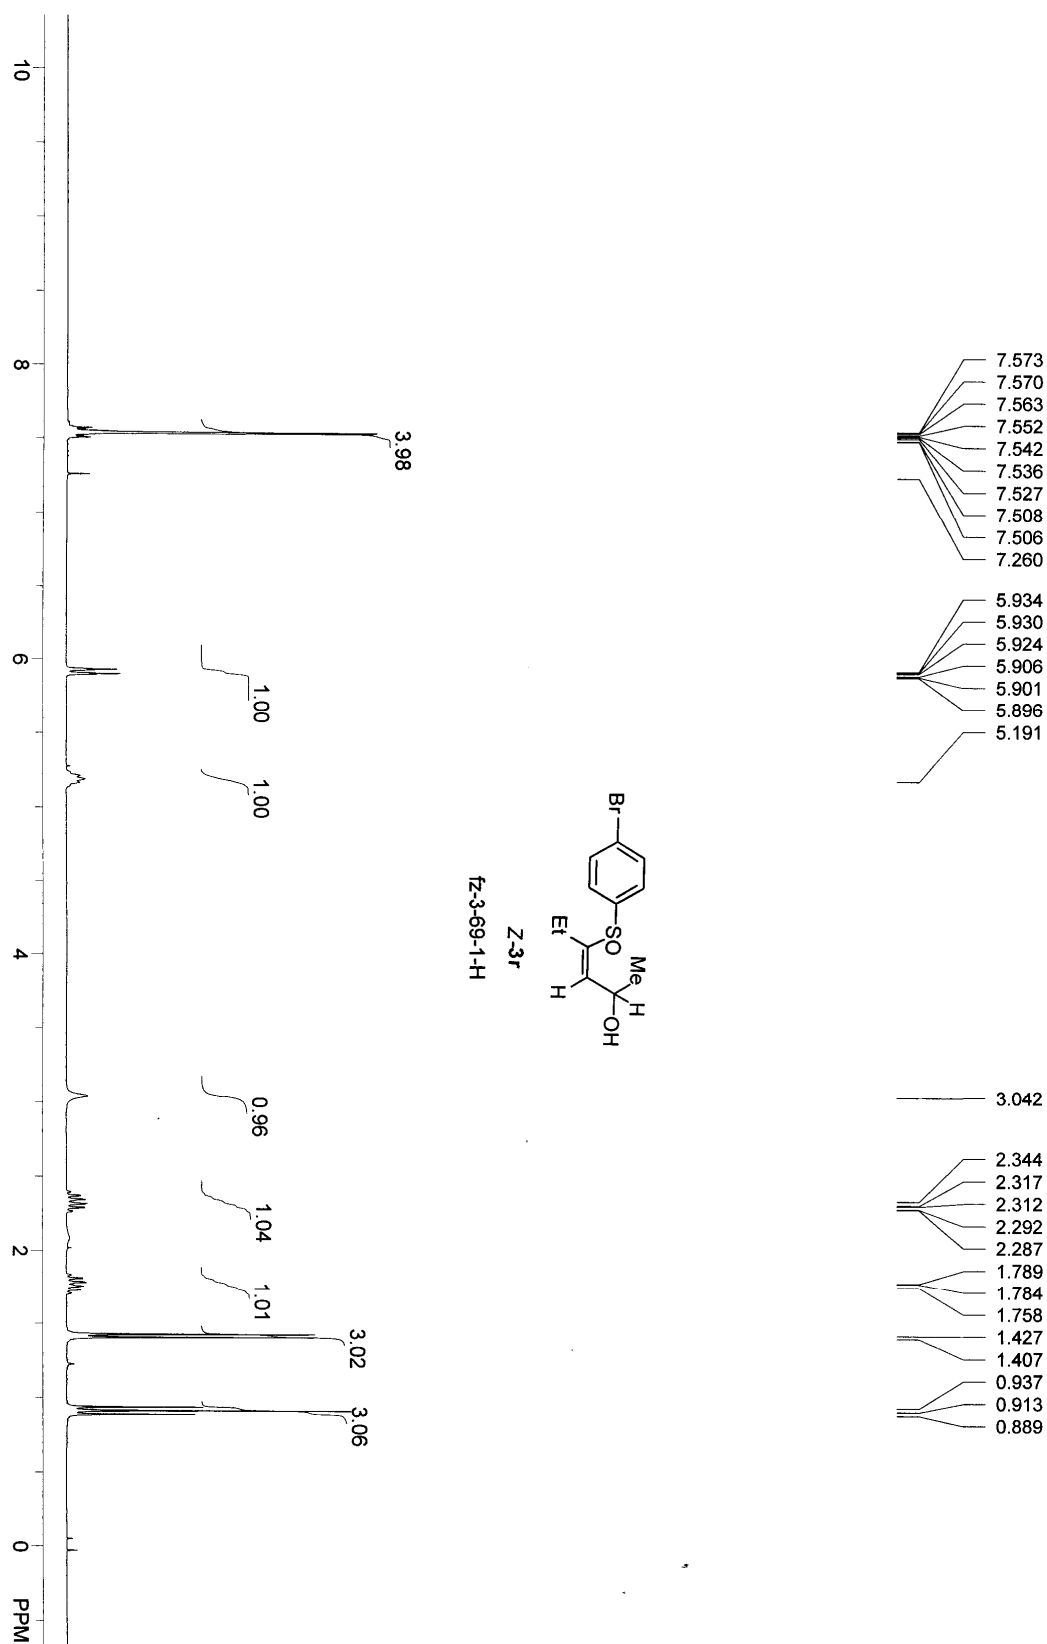

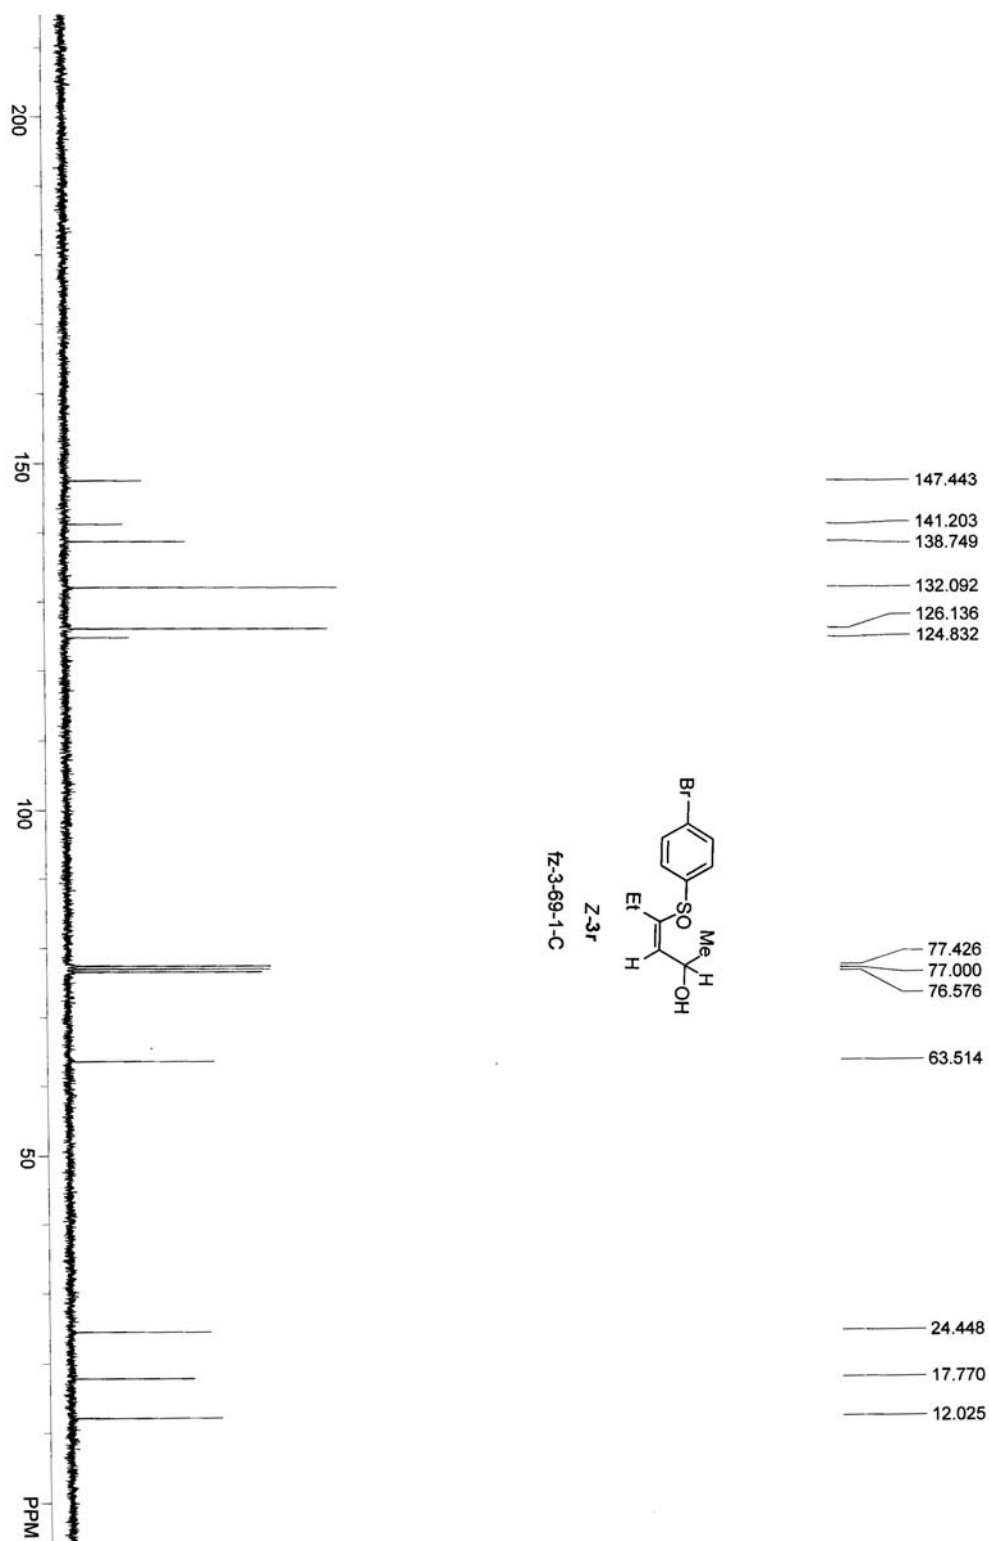

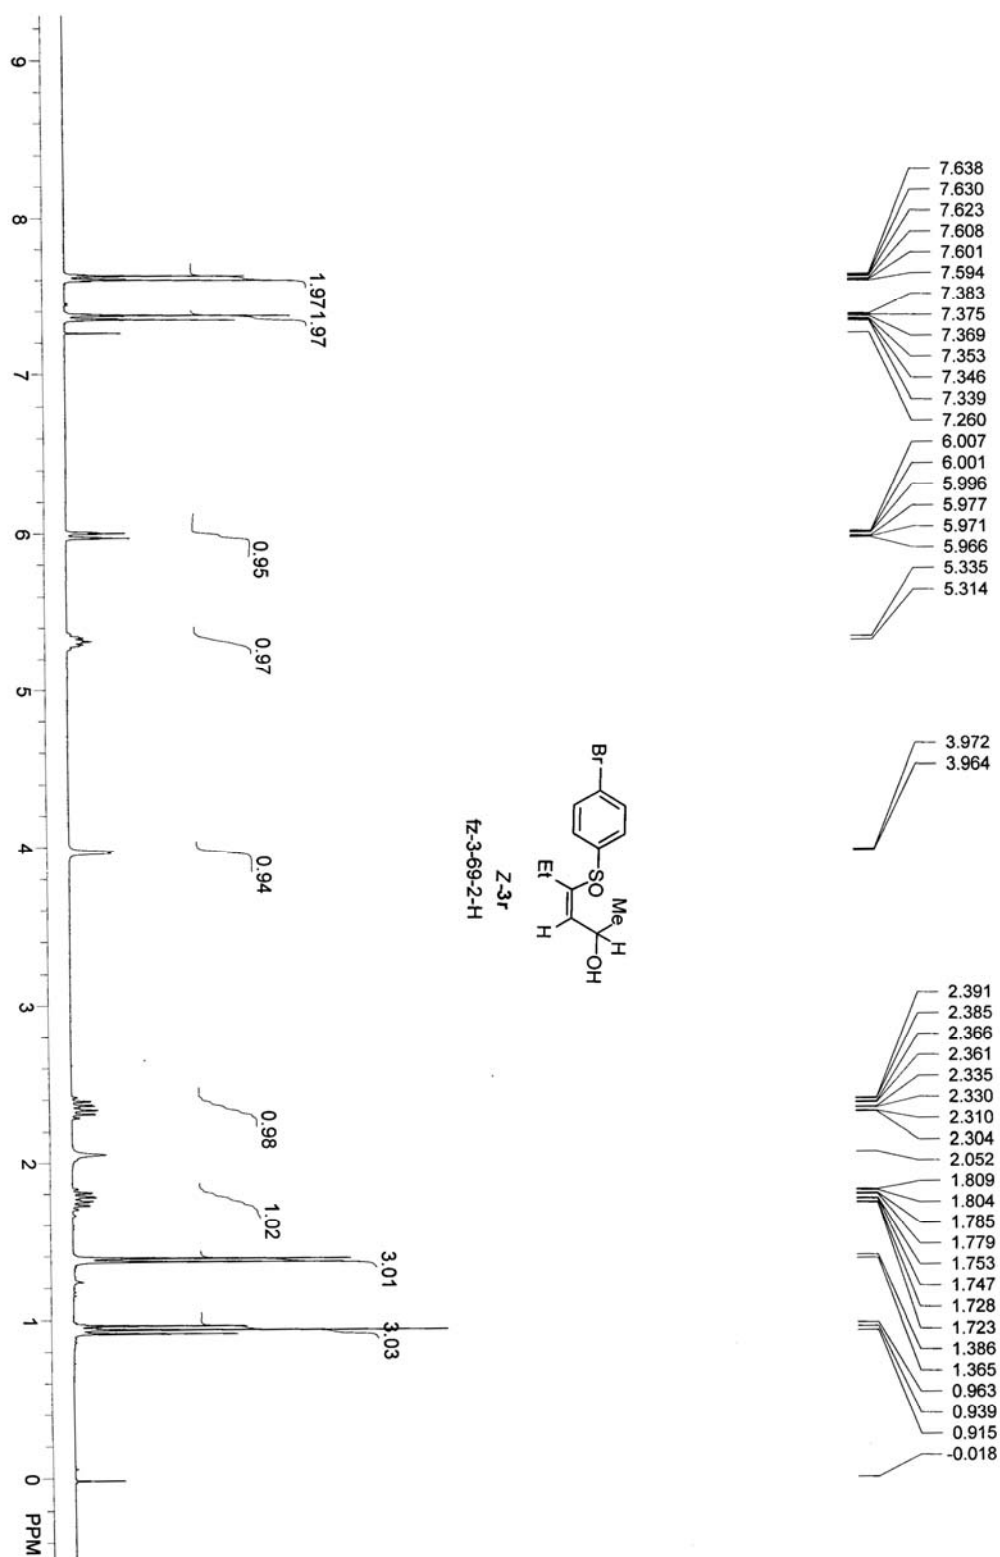

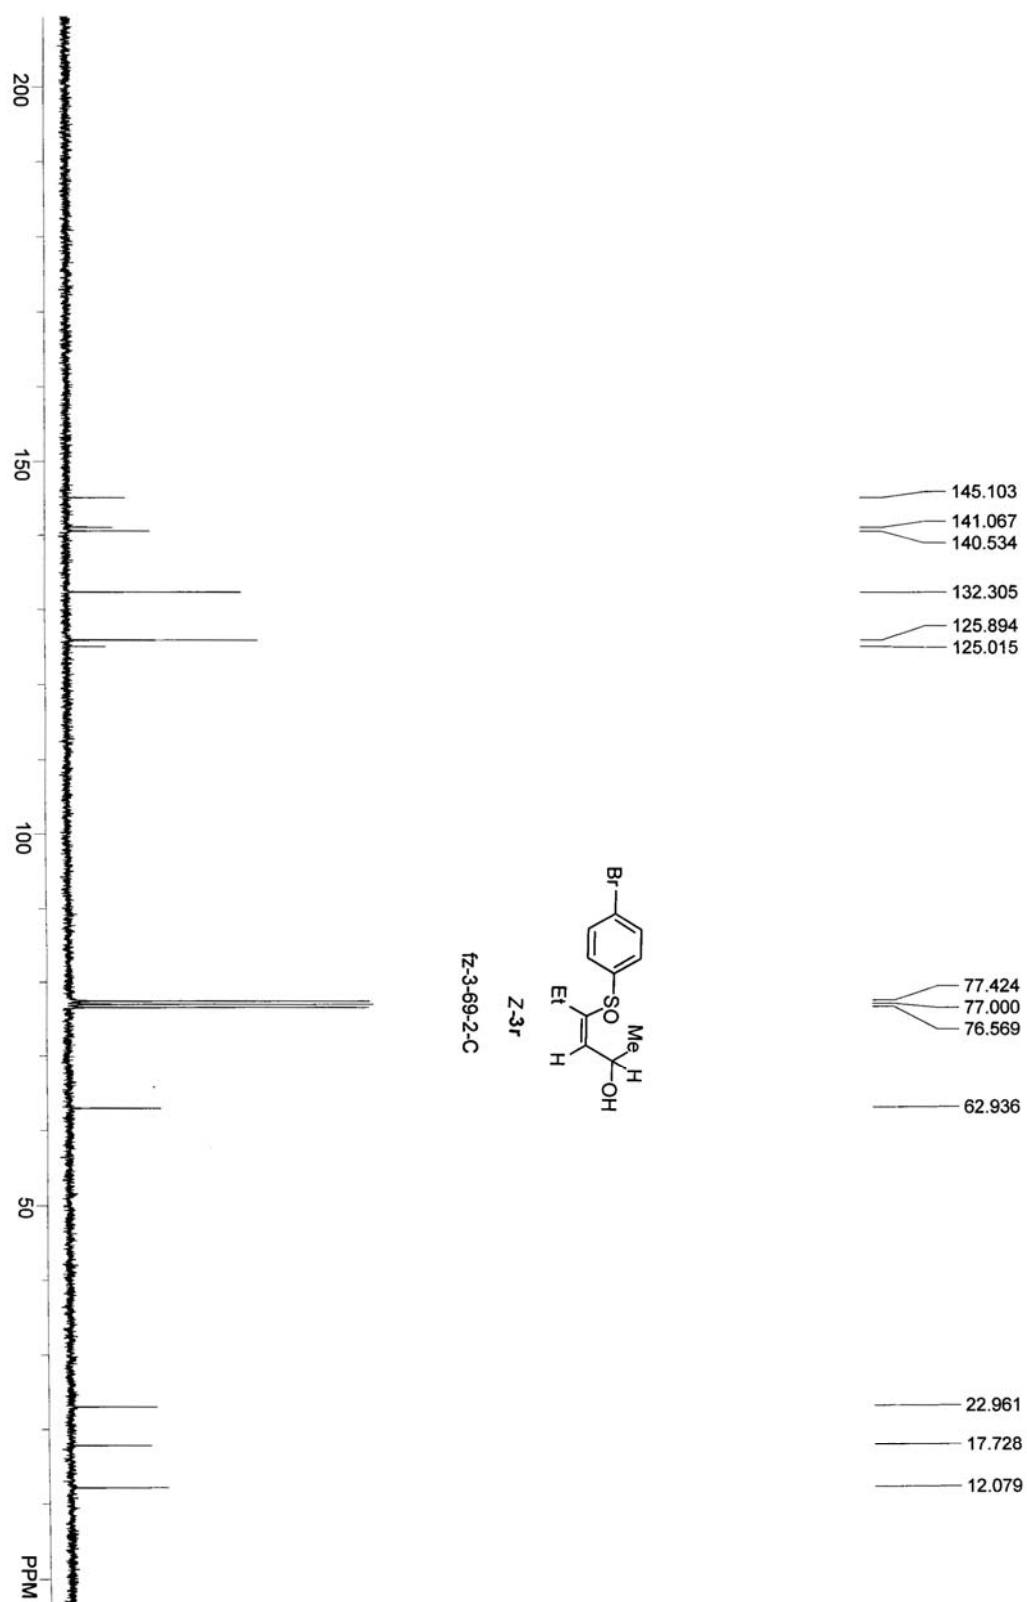

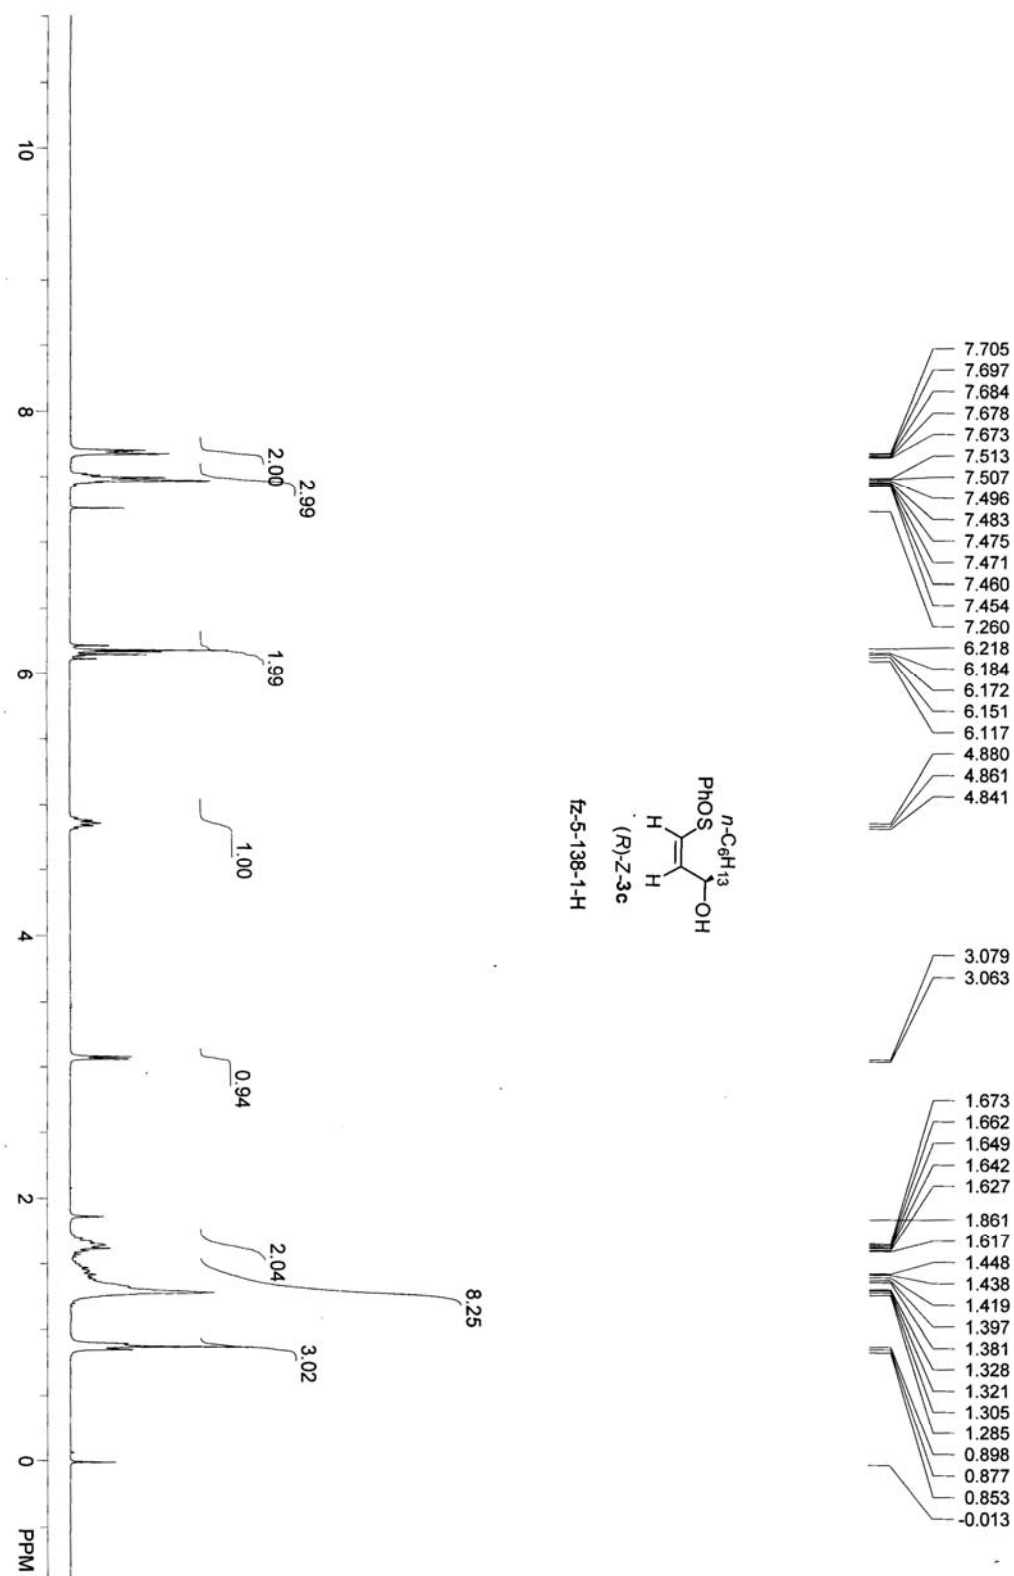

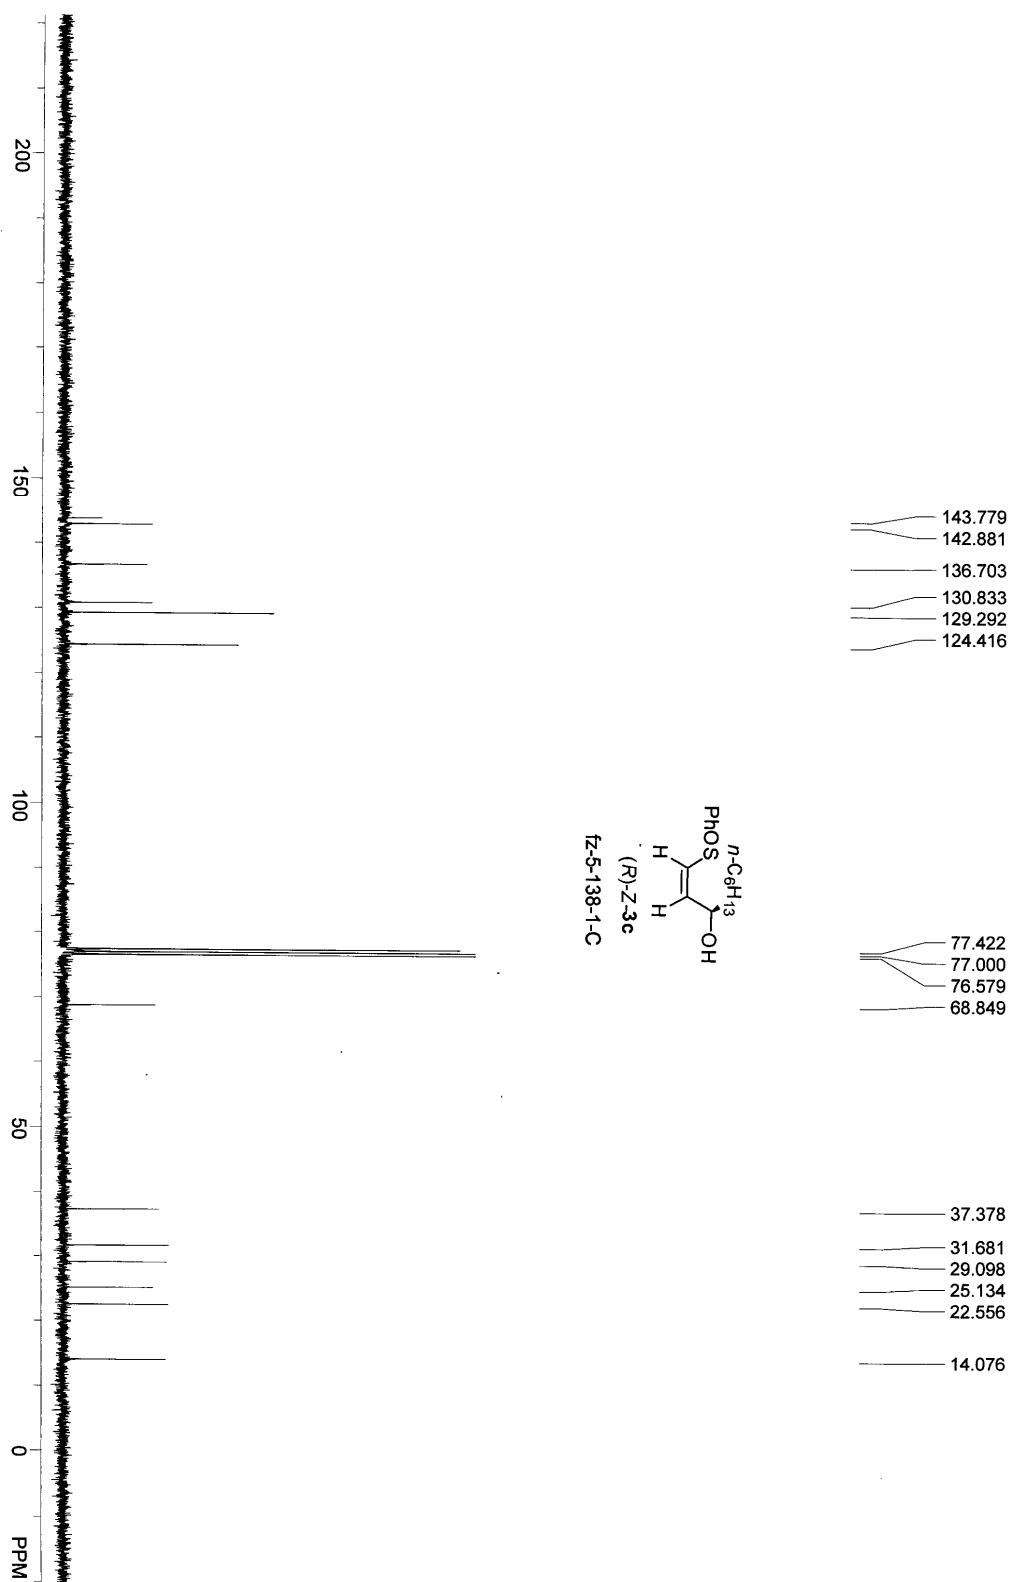

Data File D:\HPCHEM\1\DATA\FZ\FZ000124.D

Sample Name: fz-5-135-1

OJ-H; hexane/i-PrOH=95:5; 0.5 mL/min; 254nm

=====  
Injection Date : 3/1/2009 11:02:08 AM  
Sample Name : fz-5-135-1 Location : -  
Acq. Operator : fz  
Method : D:\HPCHEM\1\DATA\LJ\LJ000012.D\DEF\_XFX.M  
Last changed : 3/1/2009 10:34:17 AM by fz  
(modified after loading)

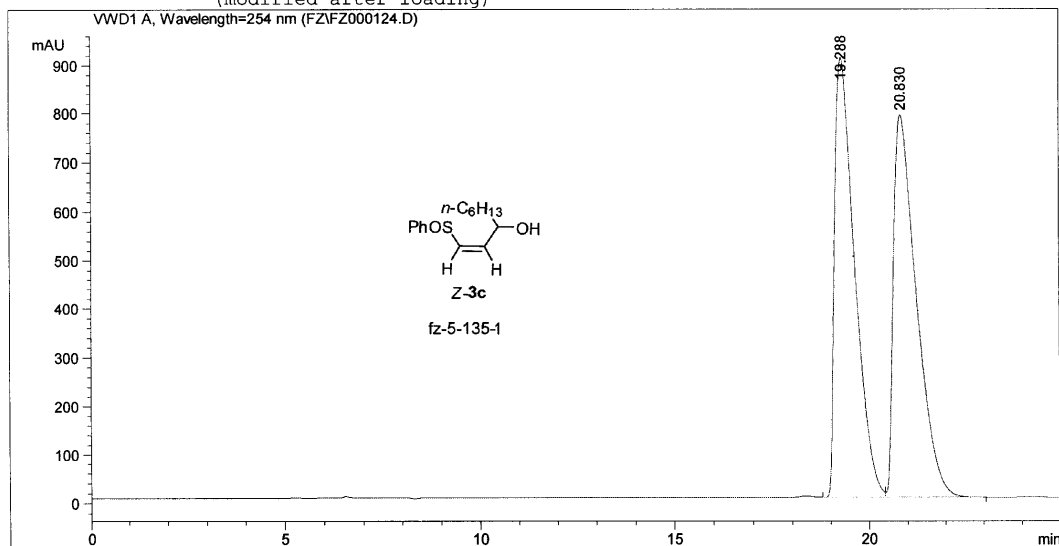

=====  
Area Percent Report  
=====

Sorted By : Signal  
Multiplier : 1.0000  
Dilution : 1.0000  
Use Multiplier & Dilution Factor with ISTDs

Signal 1: VWD1 A, Wavelength=254 nm

| Peak # | RetTime [min] | Type | Width [min] | Area mAU*s | Height [mAU] | Area %  |
|--------|---------------|------|-------------|------------|--------------|---------|
| 1      | 19.288        | VV   | 0.5474      | 3.24940e4  | 904.28009    | 49.7787 |
| 2      | 20.830        | VB   | 0.6274      | 3.27829e4  | 784.40448    | 50.2213 |

Totals : 6.52770e4 1688.68457

Results obtained with enhanced integrator!

=====  
\*\*\* End of Report \*\*\*

Data File D:\HPCHEM\1\DATA\FZ\FZ000125.D

Sample Name: fz-5-138-1

OJ-H; hexane/i-PrOH=95:5; 0.5 mL/min; 254nm

```
=====
Injection Date   : 3/1/2009 12:18:20 PM
Sample Name      : fz-5-138-1                Location :   -
Acq. Operator    : fz
Method           : D:\HPCHEM\1\DATA\LJ\LJ000012.D\DEF_XFX.M
Last changed     : 3/1/2009 10:34:17 AM by fz
                  (modified after loading)
=====
```

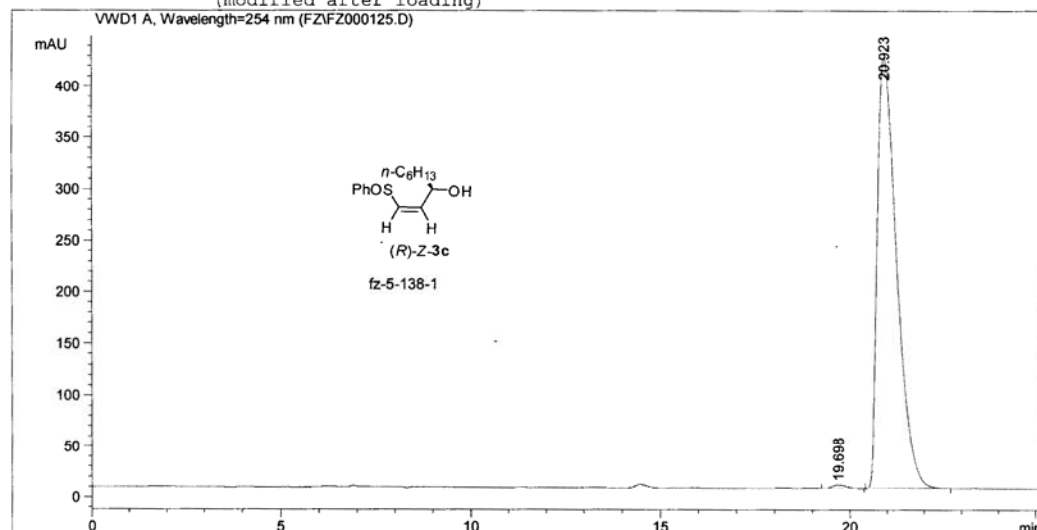

Area Percent Report

```
=====
Sorted By       :      Signal
Multiplier      :      1.0000
Dilution        :      1.0000
Use Multiplier & Dilution Factor with ISTDs
=====
```

Signal 1: VWD1 A, Wavelength=254 nm

| Peak # | RetTime [min] | Type | Width [min] | Area mAU*s | Height [mAU] | Area %  |
|--------|---------------|------|-------------|------------|--------------|---------|
| 1      | 19.698        | BP   | 0.3847      | 86.11472   | 3.34642      | 0.5620  |
| 2      | 20.923        | BB   | 0.5565      | 1.52356e4  | 419.24820    | 99.4380 |

Totals : 1.53217e4 422.59462

Results obtained with enhanced integrator!

\*\*\* End of Report \*\*\*



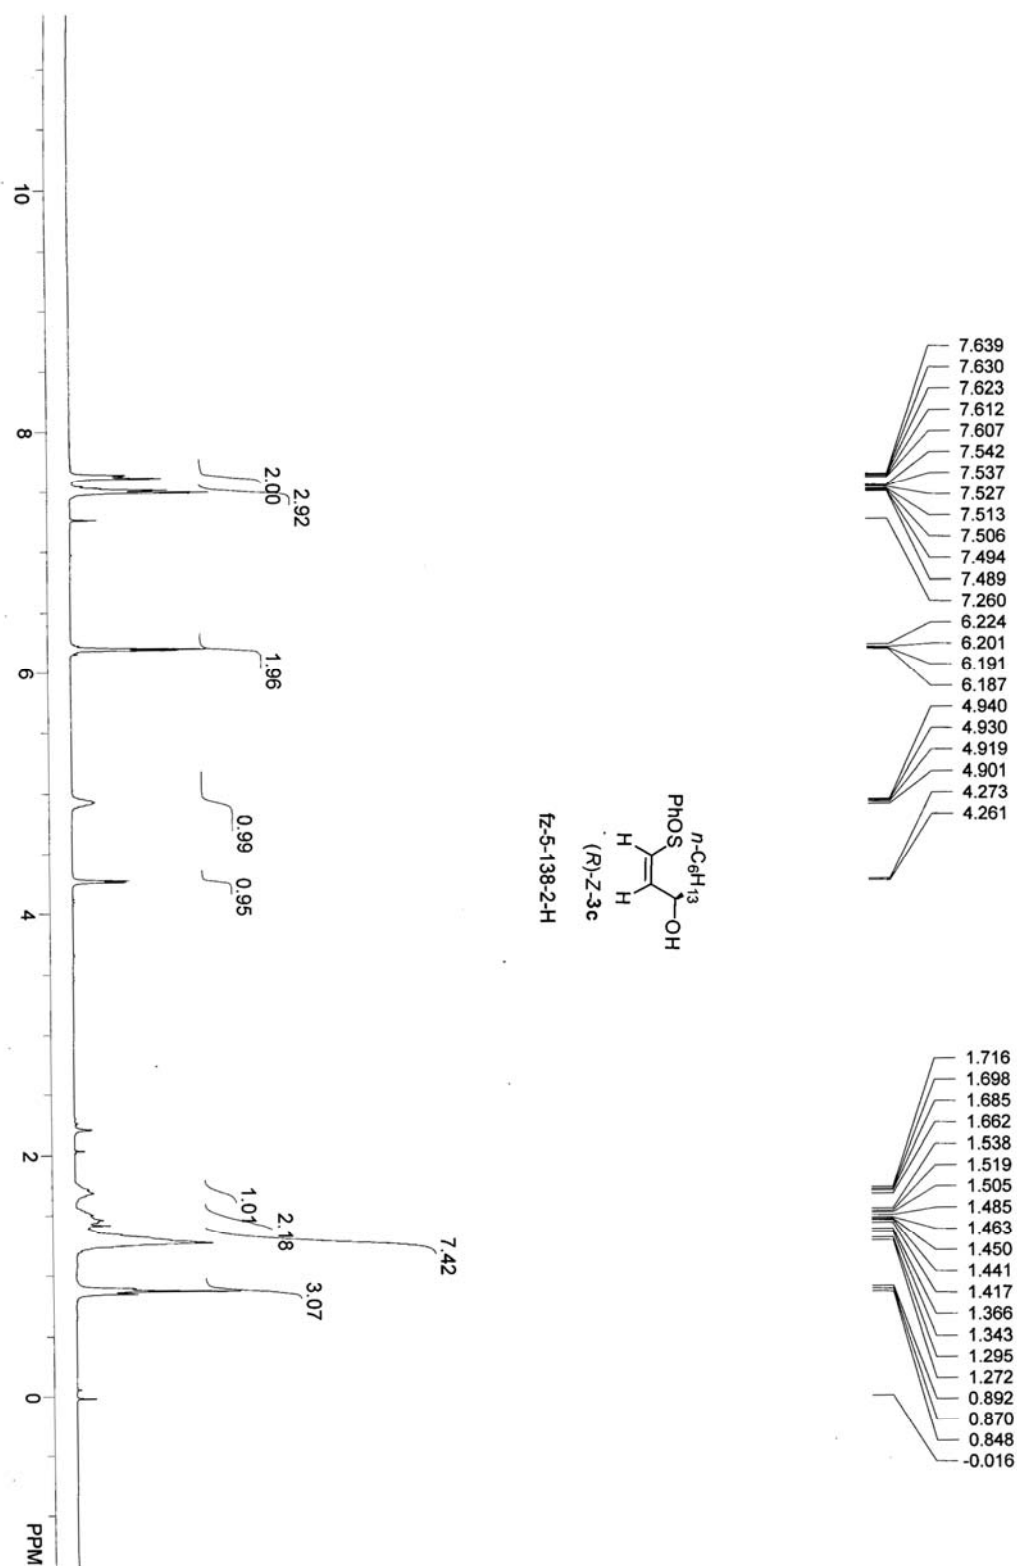

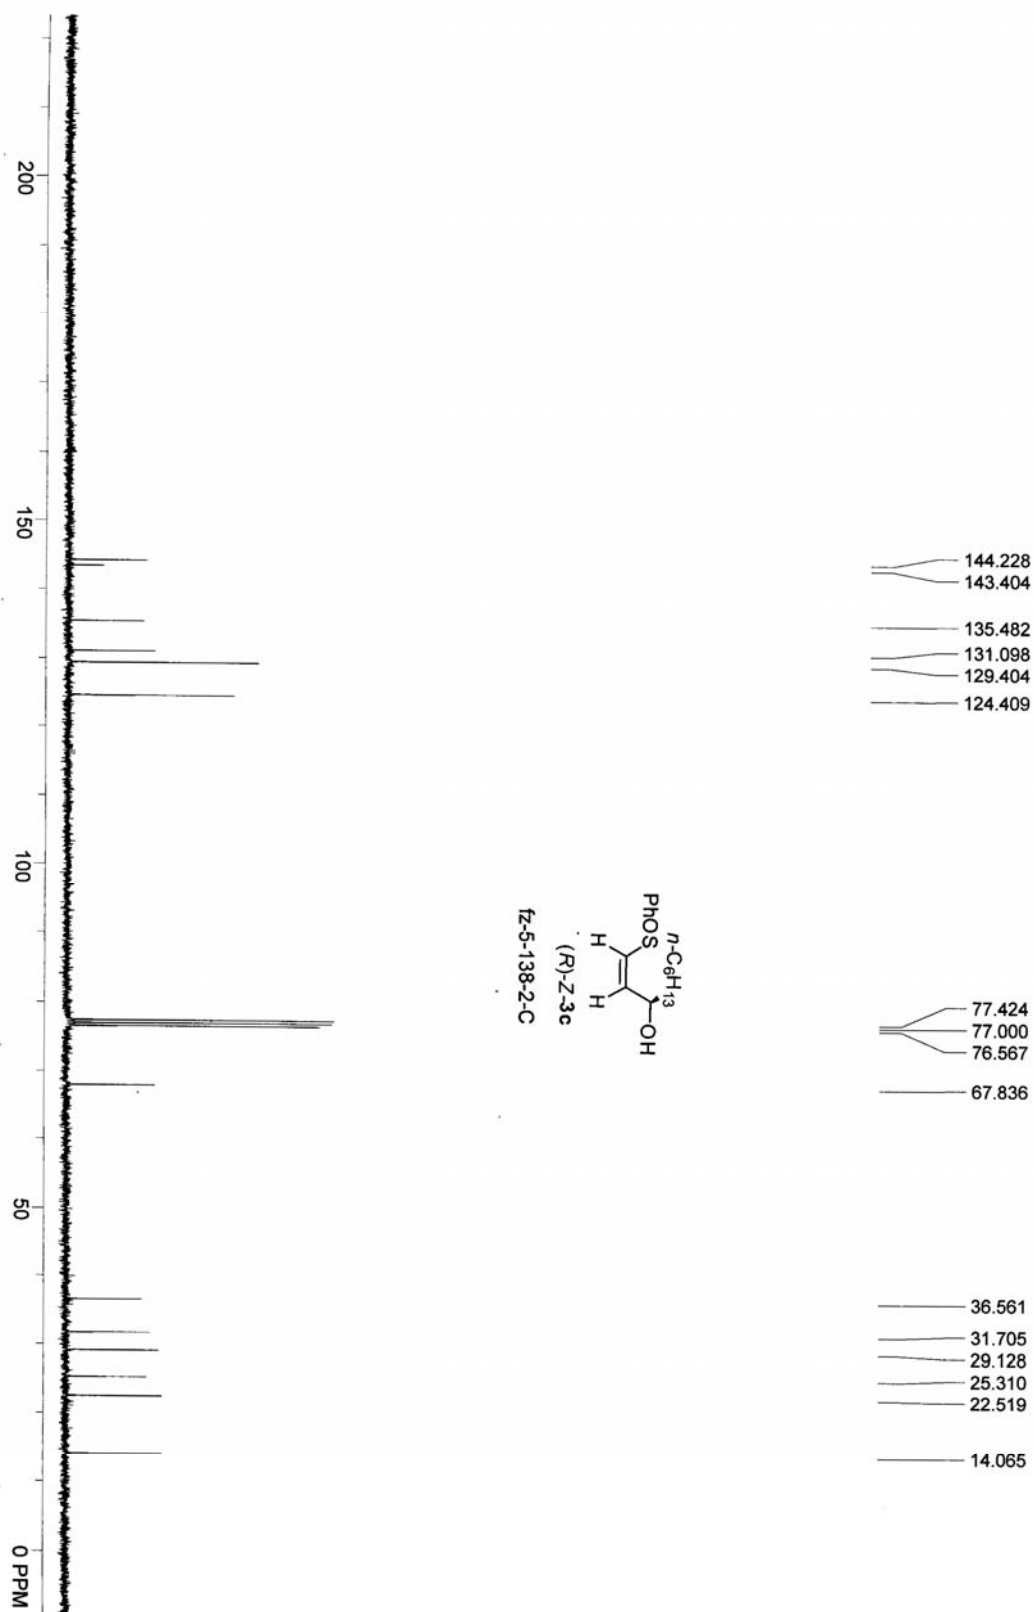

Data File D:\HPCHEM\1\DATA\FZ\FZ000126.D

Sample Name: fz-5-135-2

OJ-H; hexane/i-PrOH=95:5; 0.5 mL/min; 254nm

=====  
Injection Date : 3/1/2009 12:47:39 PM  
Sample Name : fz-5-135-2 Location : -  
Acq. Operator : fz  
Method : D:\HPCHEM\1\DATA\LJ\LJ000012.D\DEF\_XFX.M  
Last changed : 3/1/2009 10:34:17 AM by fz  
(modified after loading)

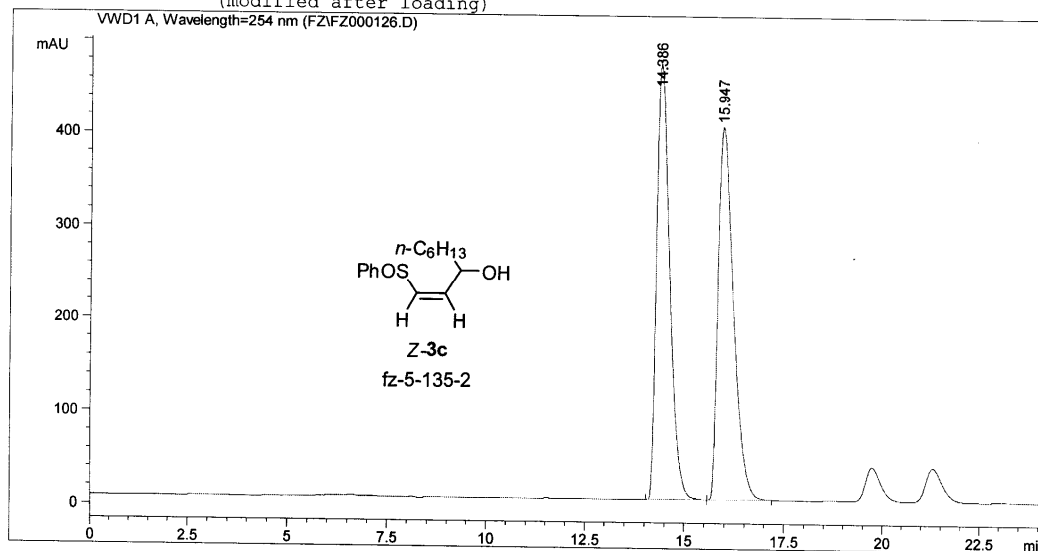

=====  
Area Percent Report  
=====

Sorted By : Signal  
Multiplier : 1.0000  
Dilution : 1.0000  
Use Multiplier & Dilution Factor with ISTDs

Signal 1: VWD1 A, Wavelength=254 nm

| Peak # | RetTime [min] | Type | Width [min] | Area mAU *s | Height [mAU] | Area %  |
|--------|---------------|------|-------------|-------------|--------------|---------|
| 1      | 14.386        | PB   | 0.3508      | 1.07082e4   | 469.04782    | 50.0115 |
| 2      | 15.947        | BB   | 0.4077      | 1.07032e4   | 400.78946    | 49.9885 |

Totals : 2.14114e4 869.83728

Results obtained with enhanced integrator!

=====  
\*\*\* End of Report \*\*\*

Data File D:\HPCHEM\1\DATA\FZ\FZ000127.D

Sample Name: fz-5-138-2

OJ-H; hexane/i-PrOH=95:5; 0.5 mL/min; 254nm

```
=====
Injection Date   : 3/1/2009 1:15:01 PM
Sample Name      : fz-5-138-2
Acq. Operator    : fz
Acq. Method      : D:\HPCHEM\1\DATA\LJ\LJ000012.D\DEF_XFX.M
Last changed     : 3/1/2009 10:34:17 AM by fz
                  (modified after loading)
Analysis Method  : D:\HPCHEM\1\DATA\LJ\LJ000012.D\DEF_XFX.M
Last changed     : 3/1/2009 2:39:31 PM by fz
                  (modified after loading)
=====
```

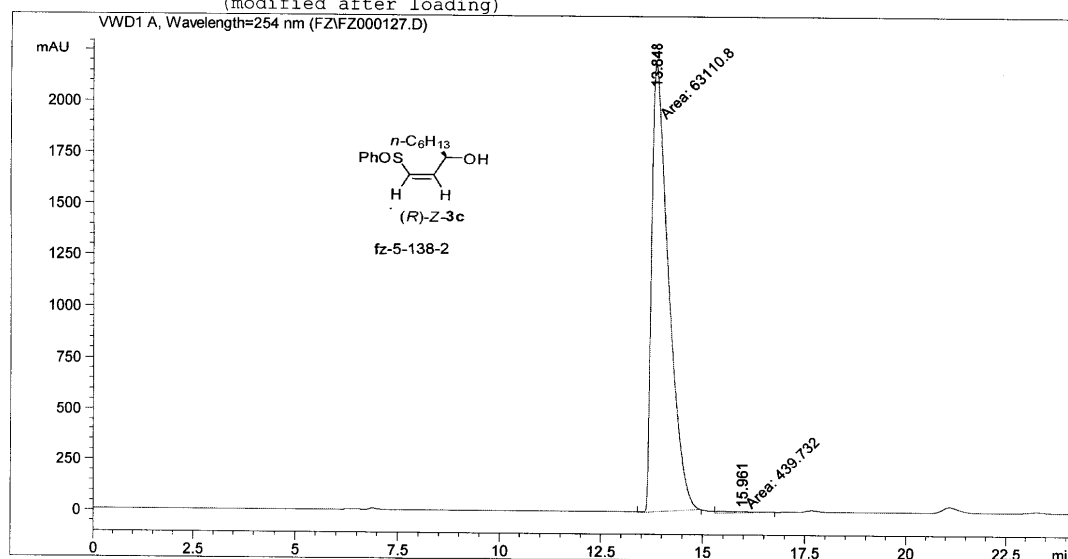

Area Percent Report

```
=====
Sorted By       : Signal
Multiplier      : 1.0000
Dilution        : 1.0000
Use Multiplier & Dilution Factor with ISTDs
=====
```

Signal 1: VWD1 A, Wavelength=254 nm

| Peak # | RetTime [min] | Type | Width [min] | Area mAU  | Area *s    | Height [mAU] | Area % |
|--------|---------------|------|-------------|-----------|------------|--------------|--------|
| 1      | 13.848        | MM   | 0.4815      | 6.31108e4 | 2184.57861 | 99.3081      |        |
| 2      | 15.961        | MM   | 0.7864      | 439.73233 | 7.10781    | 0.6919       |        |

Totals : 6.35505e4 2191.68643

Results obtained with enhanced integrator!

\*\*\* End of Report \*\*\*

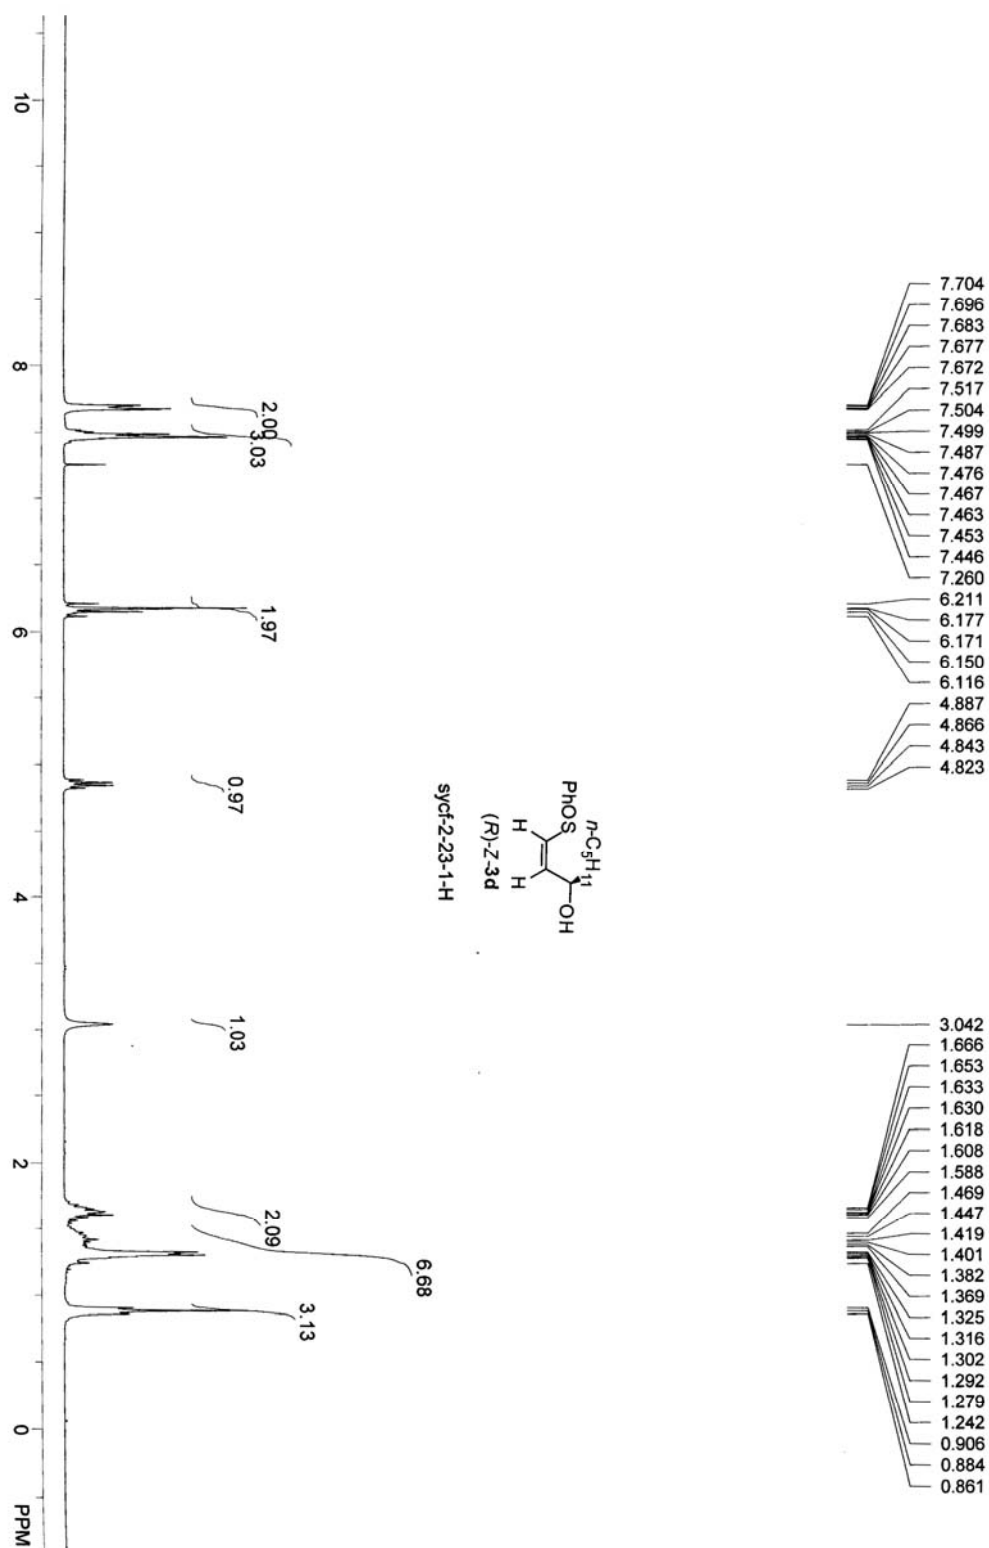

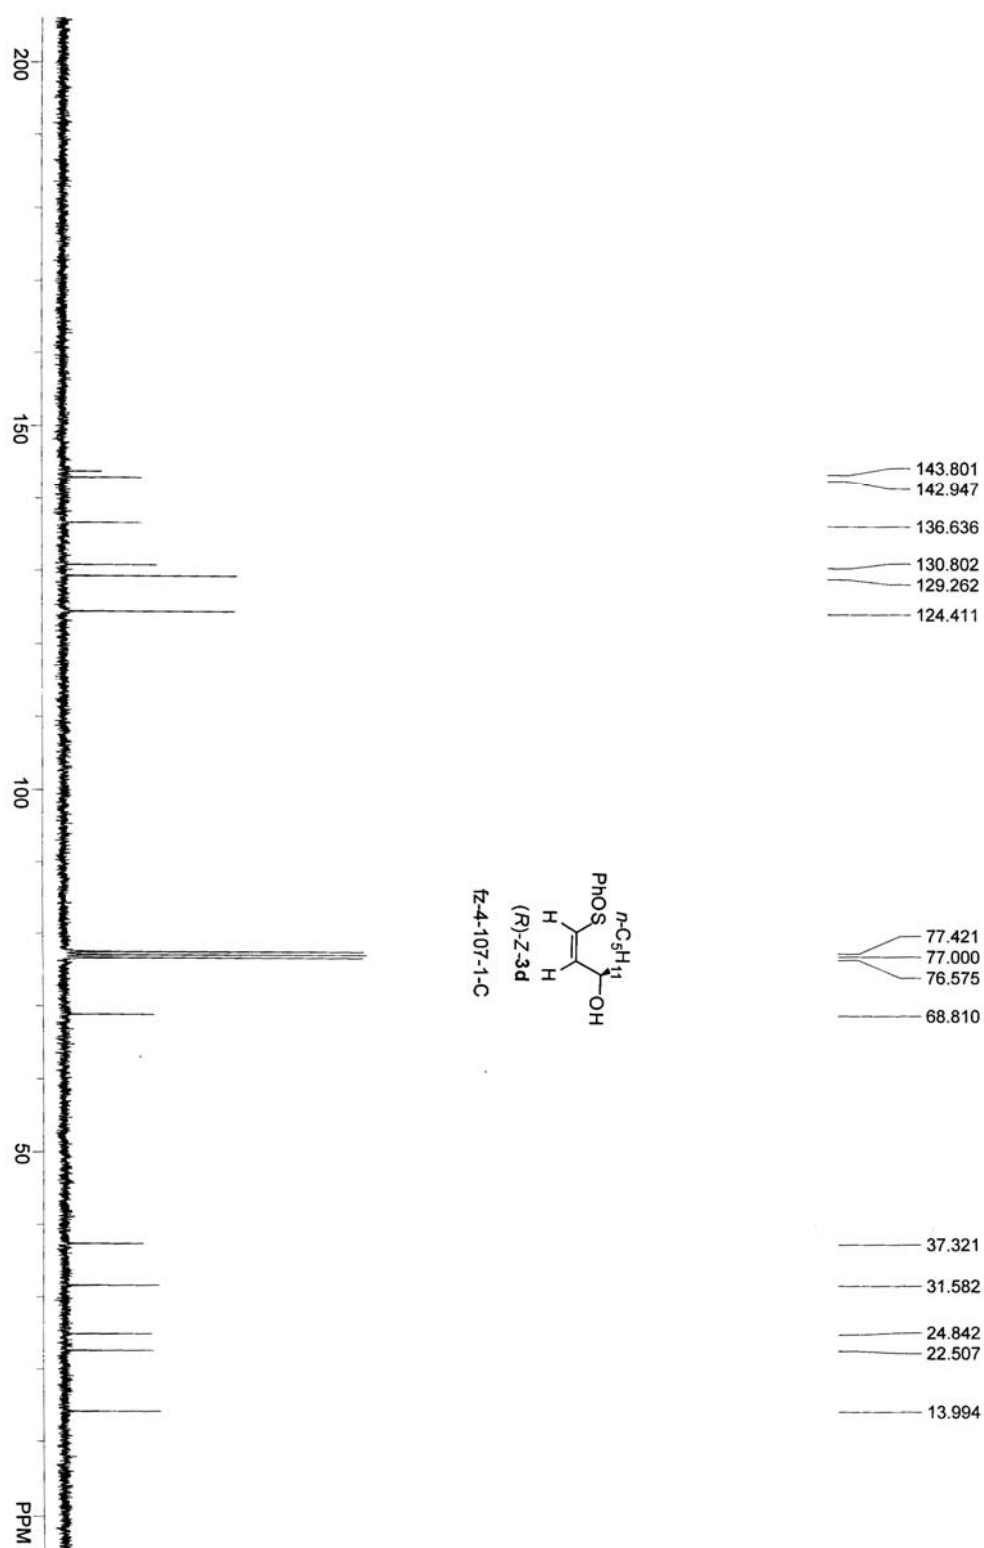

Data File D:\HPCHEM\1\DATA\FZ\FZ000113.D

Sample Name: fz-4-106-1

OJ-H column; Hexane:iPrOH = 90:10; 0.5ml/min; 254nm

=====  
Injection Date : 12/20/2008 12:43:46 PM  
Sample Name : fz-4-106-1 Location : -  
Acq. Operator : fz  
Method : D:\HPCHEM\1\METHODS\XFX\_LC.M  
Last changed : 12/20/2008 11:42:12 AM By fz  
(modified after loading)

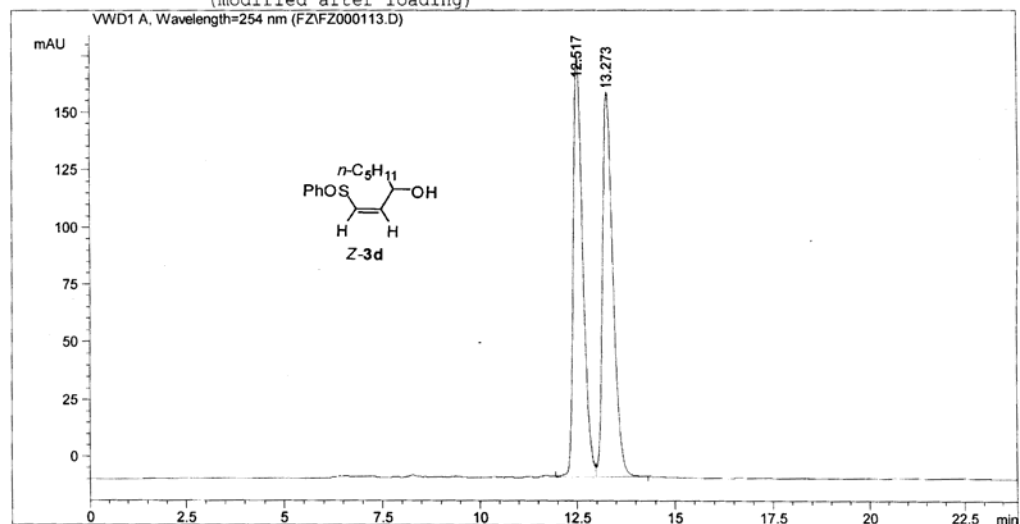

=====  
Area Percent Report  
=====

Sorted By : Signal  
Multiplier : 1.0000  
Dilution : 1.0000  
Use Multiplier & Dilution Factor with ISTDs

Signal 1: VWD1 A, Wavelength=254 nm

| Peak # | RetTime [min] | Type | Width [min] | Area mAU*s | Height [mAU] | Area %  |
|--------|---------------|------|-------------|------------|--------------|---------|
| 1      | 12.517        | VV   | 0.2600      | 3133.24756 | 183.82214    | 50.1613 |
| 2      | 13.273        | VB   | 0.2838      | 3113.10132 | 167.52574    | 49.8387 |

Totals : 6246.34888 351.34789

Results obtained with enhanced integrator!

=====  
\*\*\* End of Report \*\*\*

Data File D:\HPCHEM\1\DATA\FZ\FZ000114.D

Sample Name: fz-4-107-1

OJ-H column; Hexane:iPrOH = 90:10; 0.5ml/min; 254nm

```
=====
Injection Date   : 12/20/2008 1:10:06 PM
Sample Name     : fz-4-107-1
Acq. Operator   : fz
Method          : D:\HPCHEM\1\METHODS\XFX_LC.M
Last changed    : 12/20/2008 11:42:12 AM by fz
                  (modified after loading)
Location        : -
=====
```

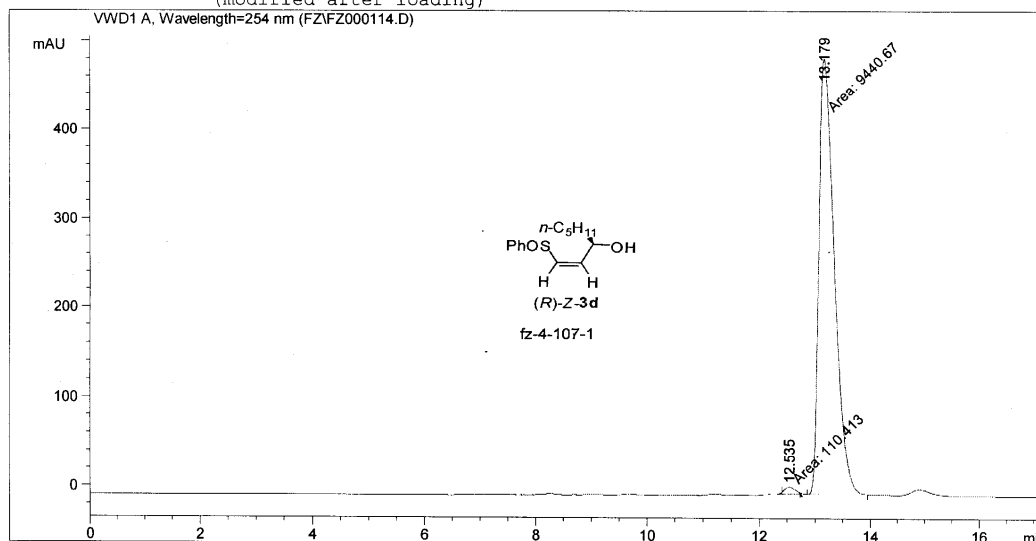

Area Percent Report

```
=====
Sorted By       : Signal
Multiplier      : 1.0000
Dilution        : 1.0000
Use Multiplier & Dilution Factor with ISTDs
=====
```

Signal 1: VWD1 A, Wavelength=254 nm

| Peak # | RetTime [min] | Type | Width [min] | Area mAU*s | Height [mAU] | Area %  |
|--------|---------------|------|-------------|------------|--------------|---------|
| 1      | 12.535        | MM   | 0.2250      | 110.41331  | 8.17980      | 1.1560  |
| 2      | 13.179        | MM   | 0.3221      | 9440.66602 | 488.53577    | 98.8440 |

Totals : 9551.07933 496.71556

Results obtained with enhanced integrator!

\*\*\* End of Report \*\*\*

$$e\% = \frac{988440 - 11560}{988440} = 97.69\%$$



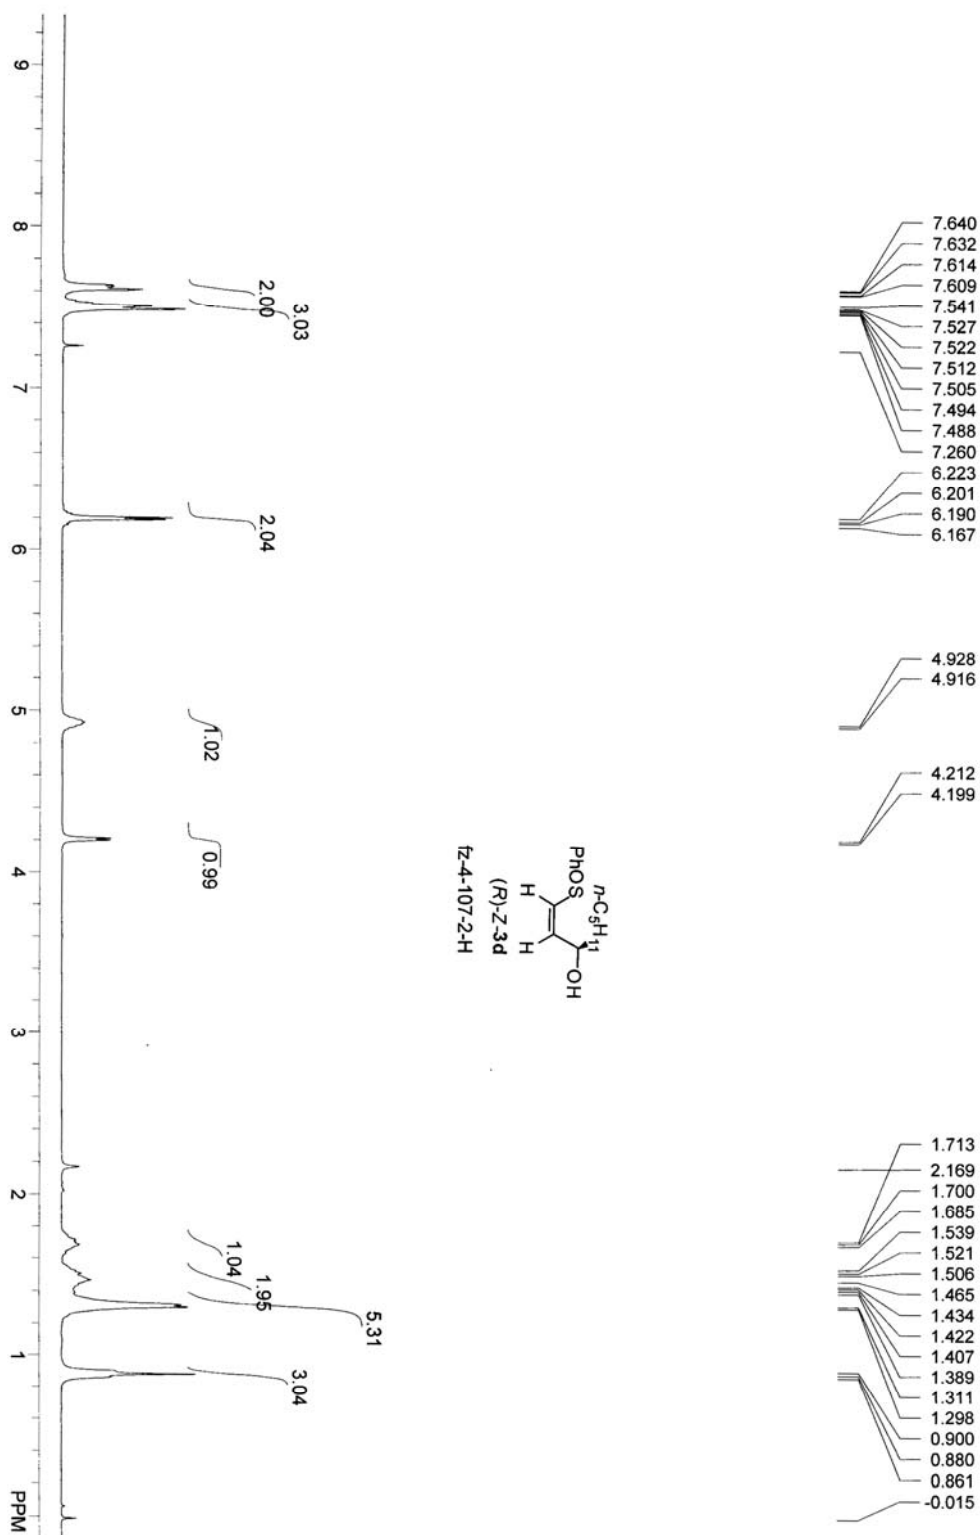

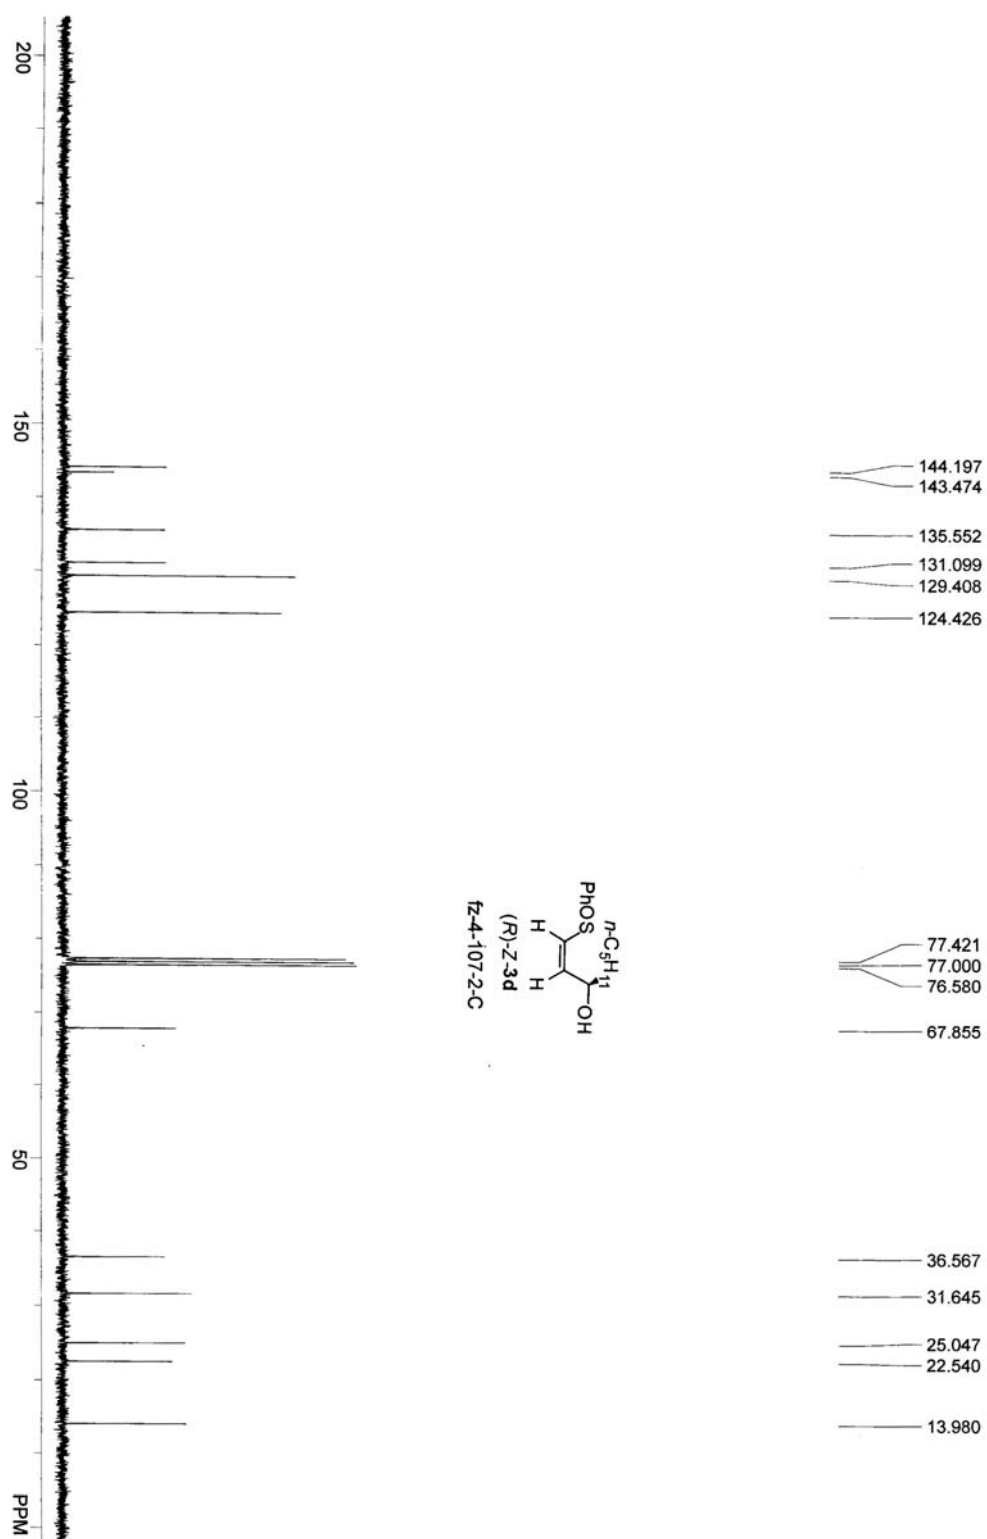

Data File D:\HPCHEM\1\DATA\FZ\FZ000112.D

Sample Name: fz-4-106-2

OJ-H column; Hexane:iPrOH = 90:10; 0.5ml/min; 254nm

=====  
Injection Date : 12/20/2008 12:16:01 PM  
Sample Name : fz-4-106-2 Location : -  
Acq. Operator : fz  
Method : D:\HPCHEM\1\METHODS\XFX LC.M  
Last changed : 12/20/2008 11:42:12 AM By fz  
(modified after loading)  
=====

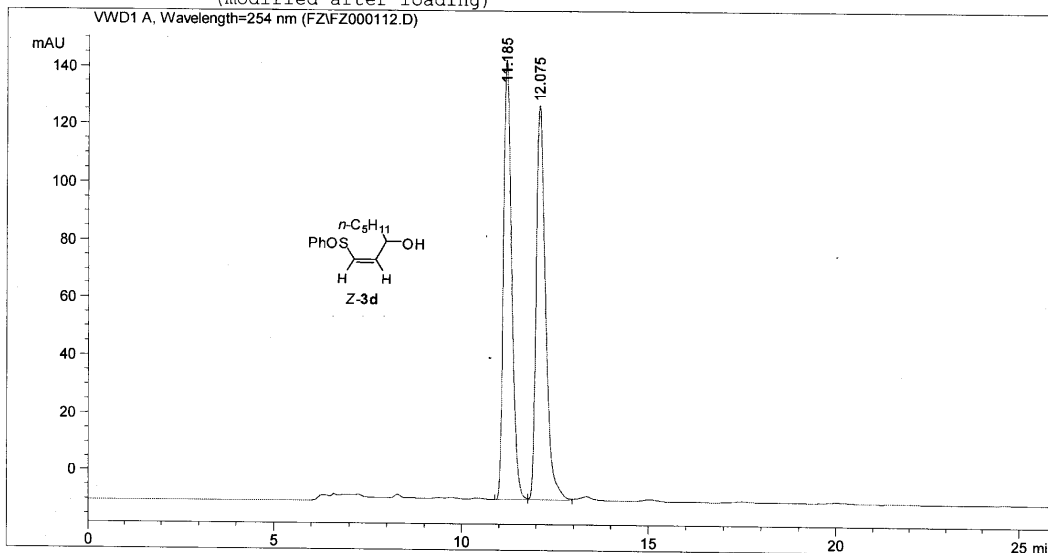

=====  
Area Percent Report  
=====

Sorted By : Signal  
Multiplier : 1.0000  
Dilution : 1.0000  
Use Multiplier & Dilution Factor with ISTDs

Signal 1: VWD1 A, Wavelength=254 nm

| Peak # | RetTime [min] | Type | Width [min] | Area mAU*s | Height [mAU] | Area %  |
|--------|---------------|------|-------------|------------|--------------|---------|
| 1      | 11.185        | BV   | 0.2348      | 2344.03174 | 152.35619    | 49.3969 |
| 2      | 12.075        | VB   | 0.2679      | 2401.27148 | 136.46500    | 50.6031 |

Totals : 4745.30322 288.82118

Results obtained with enhanced integrator!

=====  
\*\*\* End of Report \*\*\*  
=====

Data File D:\HPCHEM\1\DATA\FZ\FZ000115.D

Sample Name: fz-4-107-2

OJ-H column; Hexane:iPrOH = 90:10; 0.5ml/min; 254nm

=====  
Injection Date : 12/20/2008 1:30:29 PM  
Sample Name : fz-4-107-2 Location : -  
Acq. Operator : fz  
Method : D:\HPCHEM\1\METHODS\XFX LC.M  
Last changed : 12/20/2008 11:42:12 AM by fz  
(modified after loading)

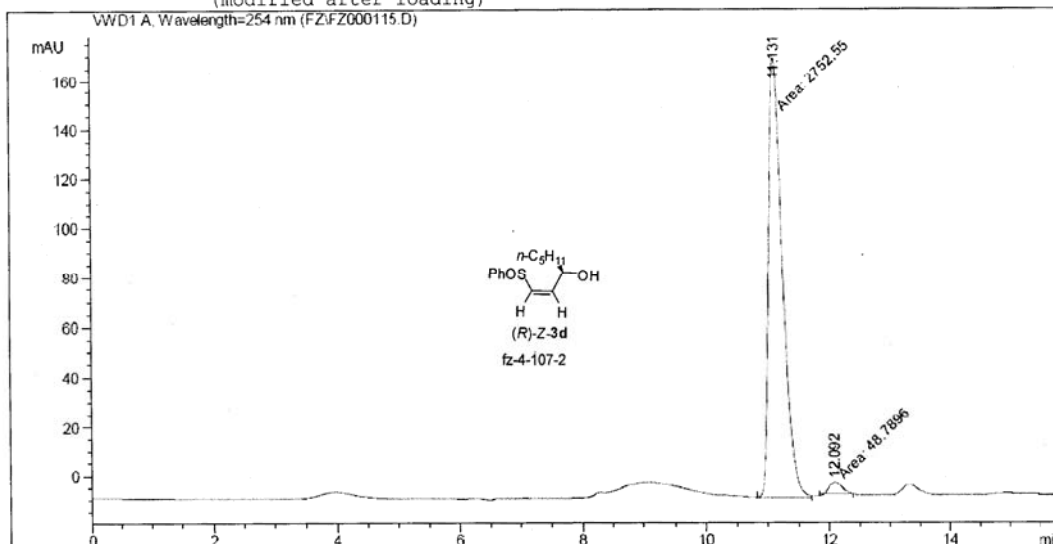

=====  
Area Percent Report  
=====

Sorted By : Signal  
Multiplier : 1.0000  
Dilution : 1.0000  
Use Multiplier & Dilution Factor with ISTDs

Signal 1: VWD1 A, Wavelength=254 nm

| Peak # | RetTime [min] | Type | Width [min] | Area mAU *s | Height [mAU] | Area %  |
|--------|---------------|------|-------------|-------------|--------------|---------|
| 1      | 11.131        | MM   | 0.2569      | 2752.55225  | 178.55991    | 98.2583 |
| 2      | 12.092        | MM   | 0.1940      | 48.78958    | 4.19074      | 1.7417  |

Totals : 2801.34182 182.75065

Results obtained with enhanced integrator!

=====  
\*\*\* End of Report \*\*\*

ee% = 98.2583 - 1.7417  
= 96.5%

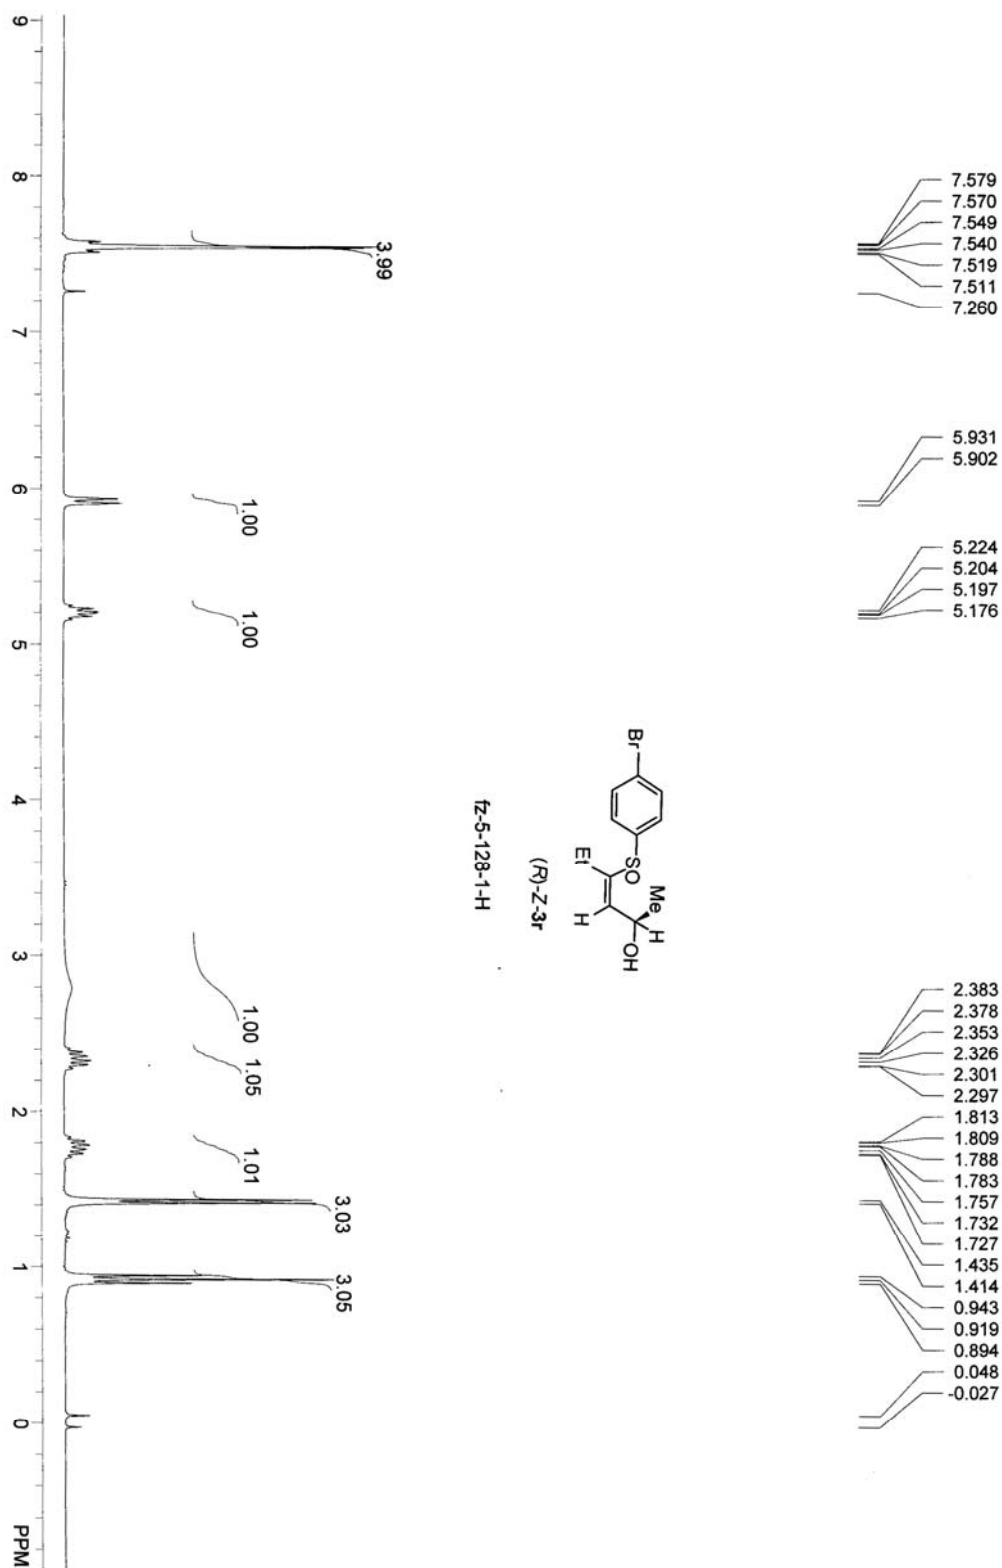

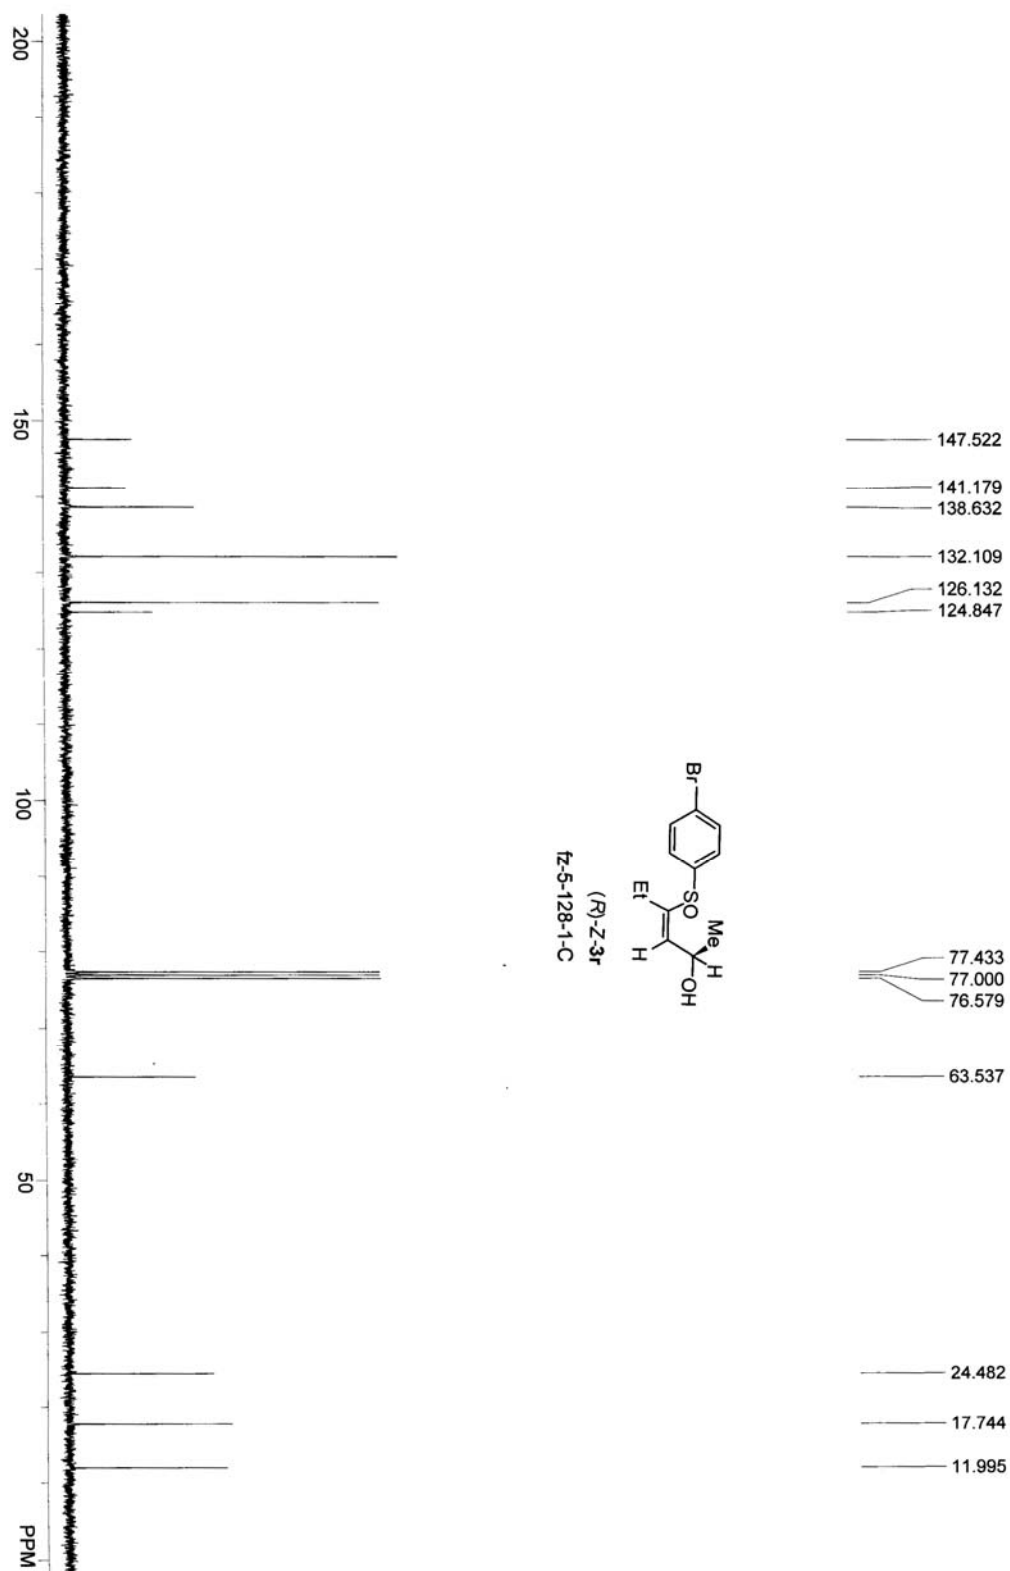

Data File D:\HPCHEM\1\DATA\FZ\FZ000116.D

Sample Name: fz-5-119-1

OJ-H; hexane/i-PrOH=90:10; 0.5 mL/min; 254nm

=====  
Injection Date : 2/24/2009 10:15:12 AM  
Sample Name : fz-5-119-1 Location : -  
Acq. Operator : fz  
Method : D:\HPCHEM\1\DATA\LJ\LJ000012.D\DEF\_XFX.M  
Last changed : 2/24/2009 9:56:29 AM by xfx  
(modified after loading)

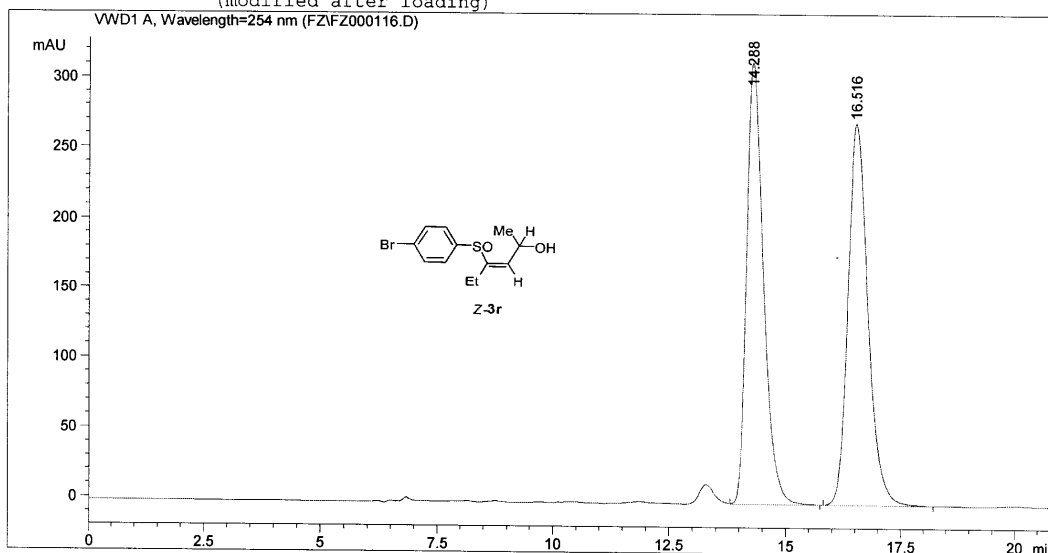

=====  
Area Percent Report  
=====

Sorted By : Signal  
Multiplier : 1.0000  
Dilution : 1.0000  
Use Multiplier & Dilution Factor with ISTDs

Signal 1: VWD1 A, Wavelength=254 nm

| Peak # | RetTime [min] | Type | Width [min] | Area mAU*s | Height [mAU] | Area %  |
|--------|---------------|------|-------------|------------|--------------|---------|
| 1      | 14.288        | VB   | 0.3864      | 7987.59619 | 314.68600    | 49.1776 |
| 2      | 16.516        | BB   | 0.4622      | 8254.73926 | 271.70612    | 50.8224 |

Totals : 1.62423e4 586.39212

Results obtained with enhanced integrator!

=====  
\*\*\* End of Report \*\*\*

Data File D:\HPCHEM\1\DATA\FZ\FZ000118.D

Sample Name: fz-5-128-1

OJ-H; hexane/i-PrOH=90:10; 0.5 mL/min; 254nm

```
=====
Injection Date   : 2/24/2009 11:02:58 AM
Sample Name      : fz-5-128-1
Acq. Operator    : fz
Method           : D:\HPCHEM\1\DATA\LJ\LJ000012.D\DEF_XFX.M
Last changed     : 2/24/2009 9:56:29 AM by xfx
                  (modified after loading)
=====
```

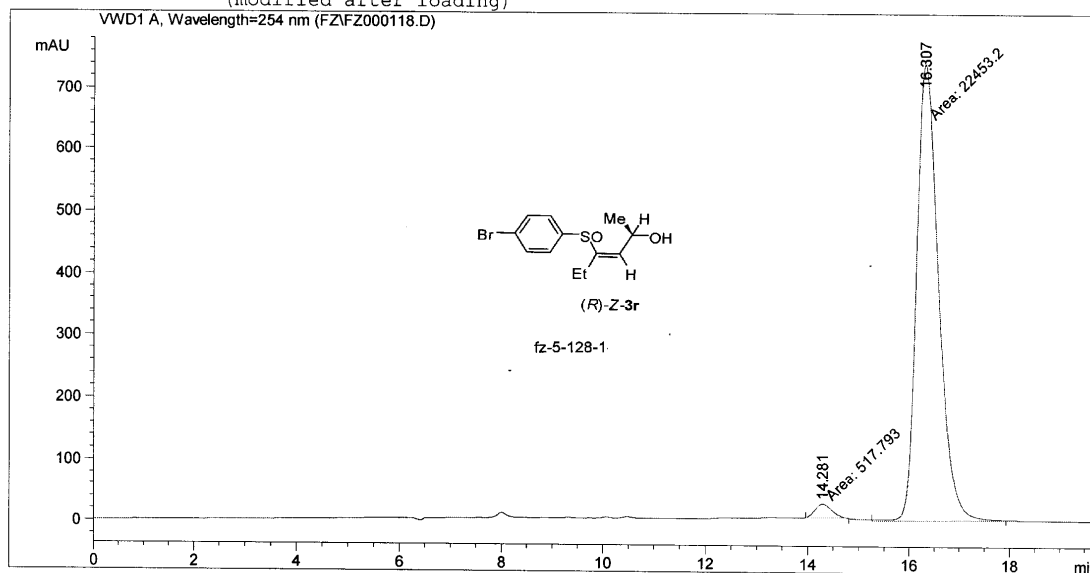

# Area Percent Report

```
=====
Sorted By      : Signal
Multiplier     : 1.0000
Dilution       : 1.0000
Use Multiplier & Dilution Factor with ISTDs
=====
```

Signal 1: VWD1 A, Wavelength=254 nm

| Peak # | RetTime [min] | Type | Width [min] | Area mAU*s | Height [mAU] | Area %  |
|--------|---------------|------|-------------|------------|--------------|---------|
| 1      | 14.281        | MM   | 0.3826      | 517.79327  | 22.55390     | 2.2541  |
| 2      | 16.307        | MM   | 0.5078      | 2.24532e4  | 736.90546    | 97.7459 |

Totals : 2.29709e4 759.45935

Results obtained with enhanced integrator!

\*\*\* End of Report \*\*\*

ee:  $97.7459 - 2.2541 = 95.491$



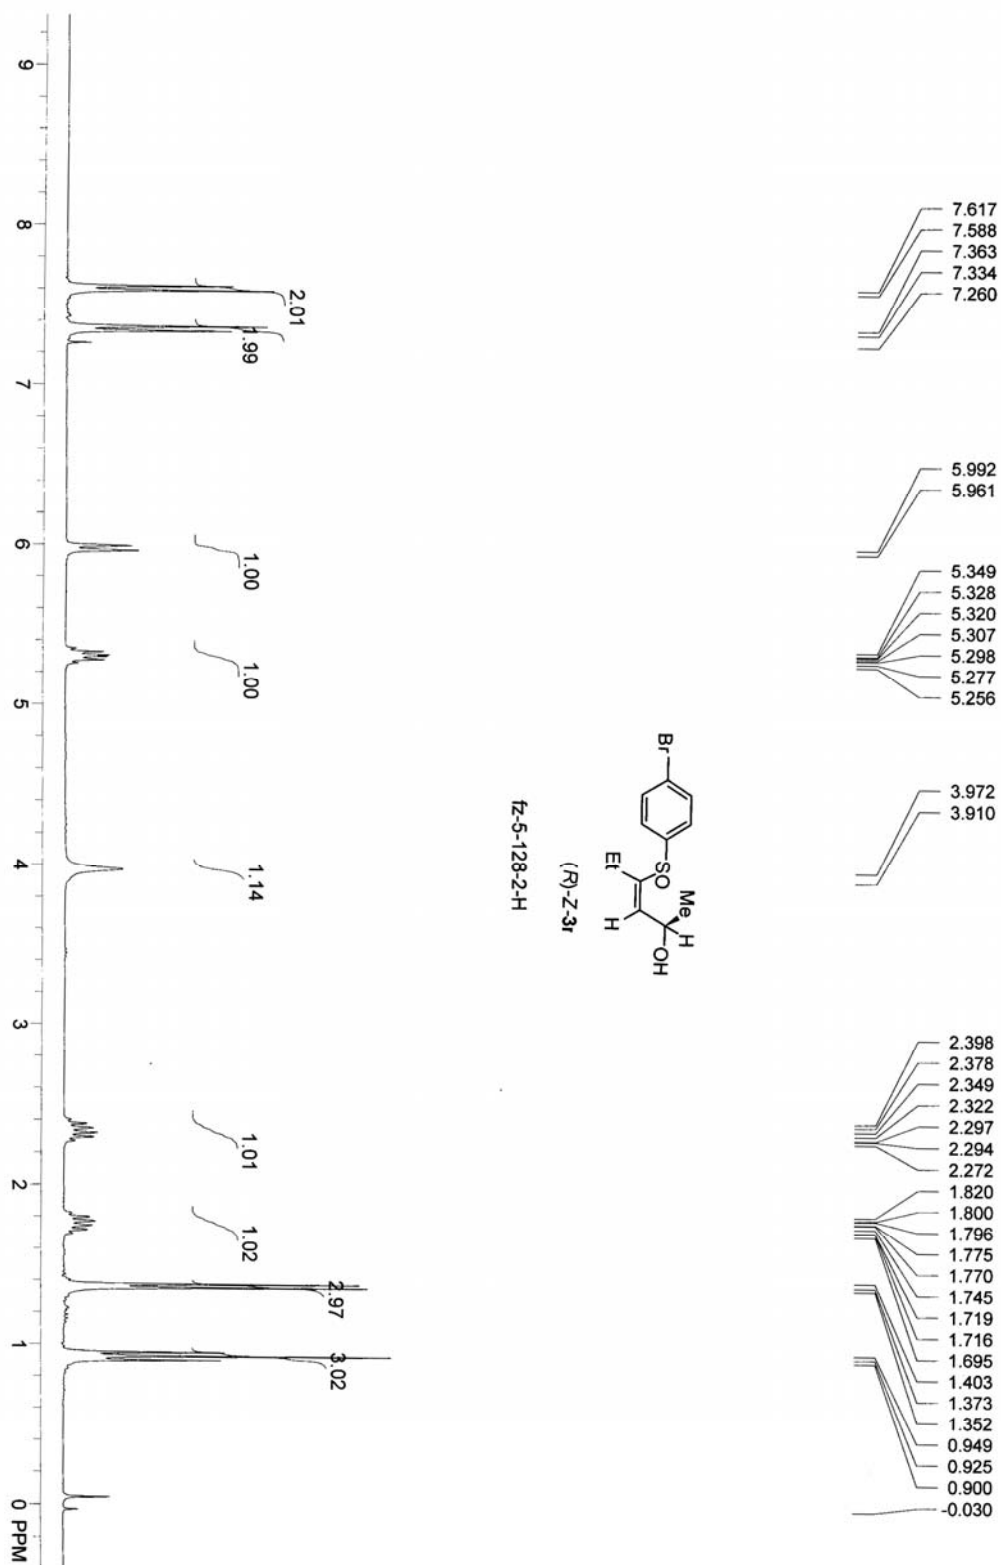

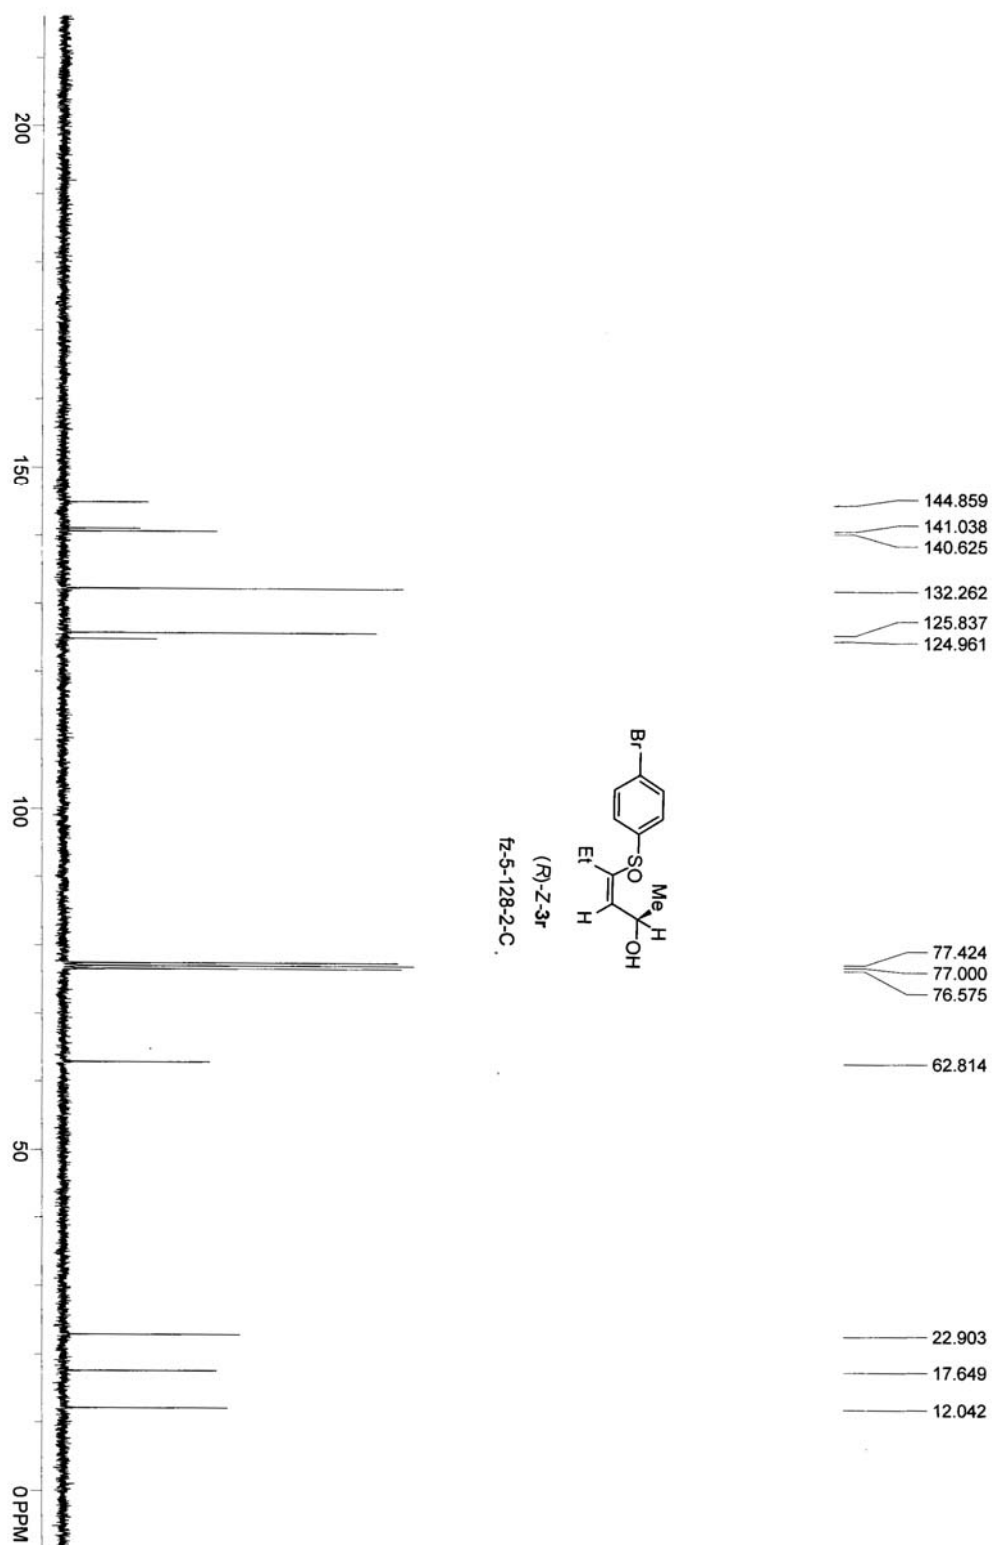

Data File D:\HPCHEM\1\DATA\FZ\FZ000119.D

Sample Name: fz-5-119-2

OJ-H; hexane/i-PrOH=90:10; 0.5 mL/min; 254nm

```
=====
Injection Date   : 2/24/2009 12:13:00 PM
Sample Name      : fz-5-119-2
Acq. Operator    : fz
Method           : D:\HPCHEM\1\DATA\LJ\LJ000012.D\DEF_XFX.M
Last changed     : 2/24/2009 9:56:29 AM by xfx
                  (modified after loading)
=====
```

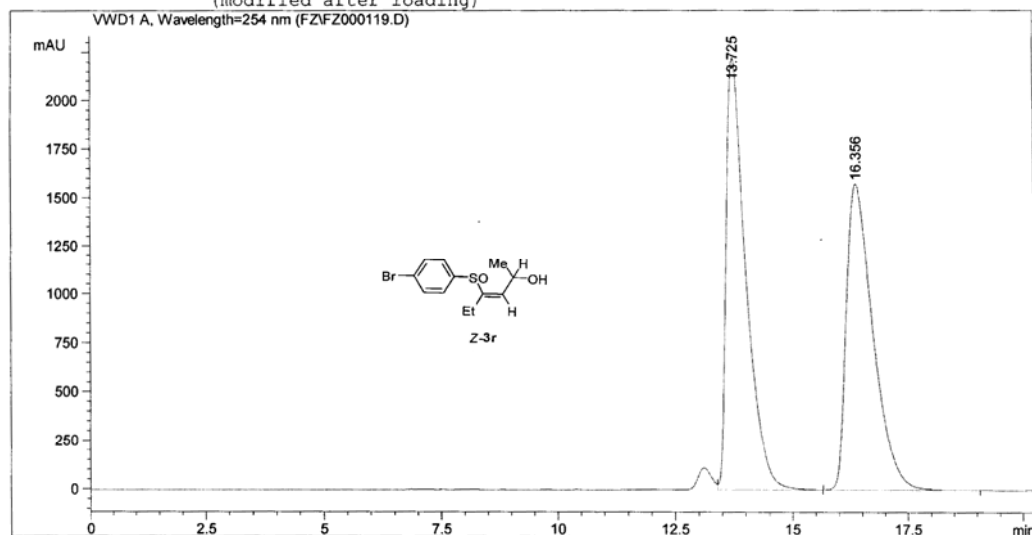

Area Percent Report

```
=====
Sorted By      : Signal
Multiplier     : 1.0000
Dilution       : 1.0000
Use Multiplier & Dilution Factor with ISTDs
=====
```

Signal 1: VWD1 A, Wavelength=254 nm

| Peak # | RetTime [min] | Type | Width [min] | Area mAU  | Area *s    | Height [mAU] | Area % |
|--------|---------------|------|-------------|-----------|------------|--------------|--------|
| 1      | 13.725        | VB   | 0.4319      | 6.48742e4 | 2224.86621 | 50.6855      |        |
| 2      | 16.356        | BB   | 0.6061      | 6.31193e4 | 1574.22498 | 49.3145      |        |

Totals : 1.27994e5 3799.09119

Results obtained with enhanced integrator!

\*\*\* End of Report \*\*\*

Data File D:\HPCHEM\1\DATA\FZ\FZ000121.D

Sample Name: fz-5-128-2

OJ-H; hexane/i-PrOH=90:10; 0.5 mL/min; 254nm

=====  
Injection Date : 2/24/2009 1:00:52 PM  
Sample Name : fz-5-128-2 Location : -  
Acq. Operator : fz  
Method : D:\HPCHEM\1\DATA\LJ\LJ000012.D\DEF\_XFX.M  
Last changed : 2/24/2009 9:56:29 AM by xfx  
(modified after loading)

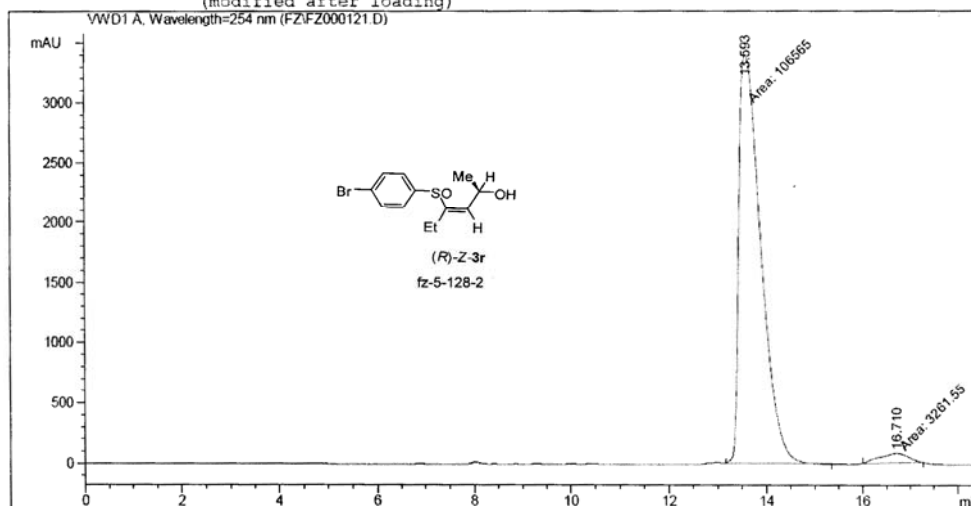

=====  
Area Percent Report  
=====

Sorted By : Signal  
Multiplier : 1.0000  
Dilution : 1.0000  
Use Multiplier & Dilution Factor with ISTDs

Signal 1: VWD1 A, Wavelength=254 nm

| Peak # | RetTime [min] | Type | Width [min] | Area mAU   | Height [mAU] | Area %  |
|--------|---------------|------|-------------|------------|--------------|---------|
| 1      | 13.593        | MM   | 0.5230      | 1.06565e5  | 3396.19458   | 97.0303 |
| 2      | 16.710        | MM   | 0.6987      | 3261.54688 | 77.79647     | 2.9697  |

Totals : 1.09826e5 3473.99105

Results obtained with enhanced integrator!

=====  
\*\*\* End of Report \*\*\*

ee: 97.0303 - 2.9697  
= 94.1

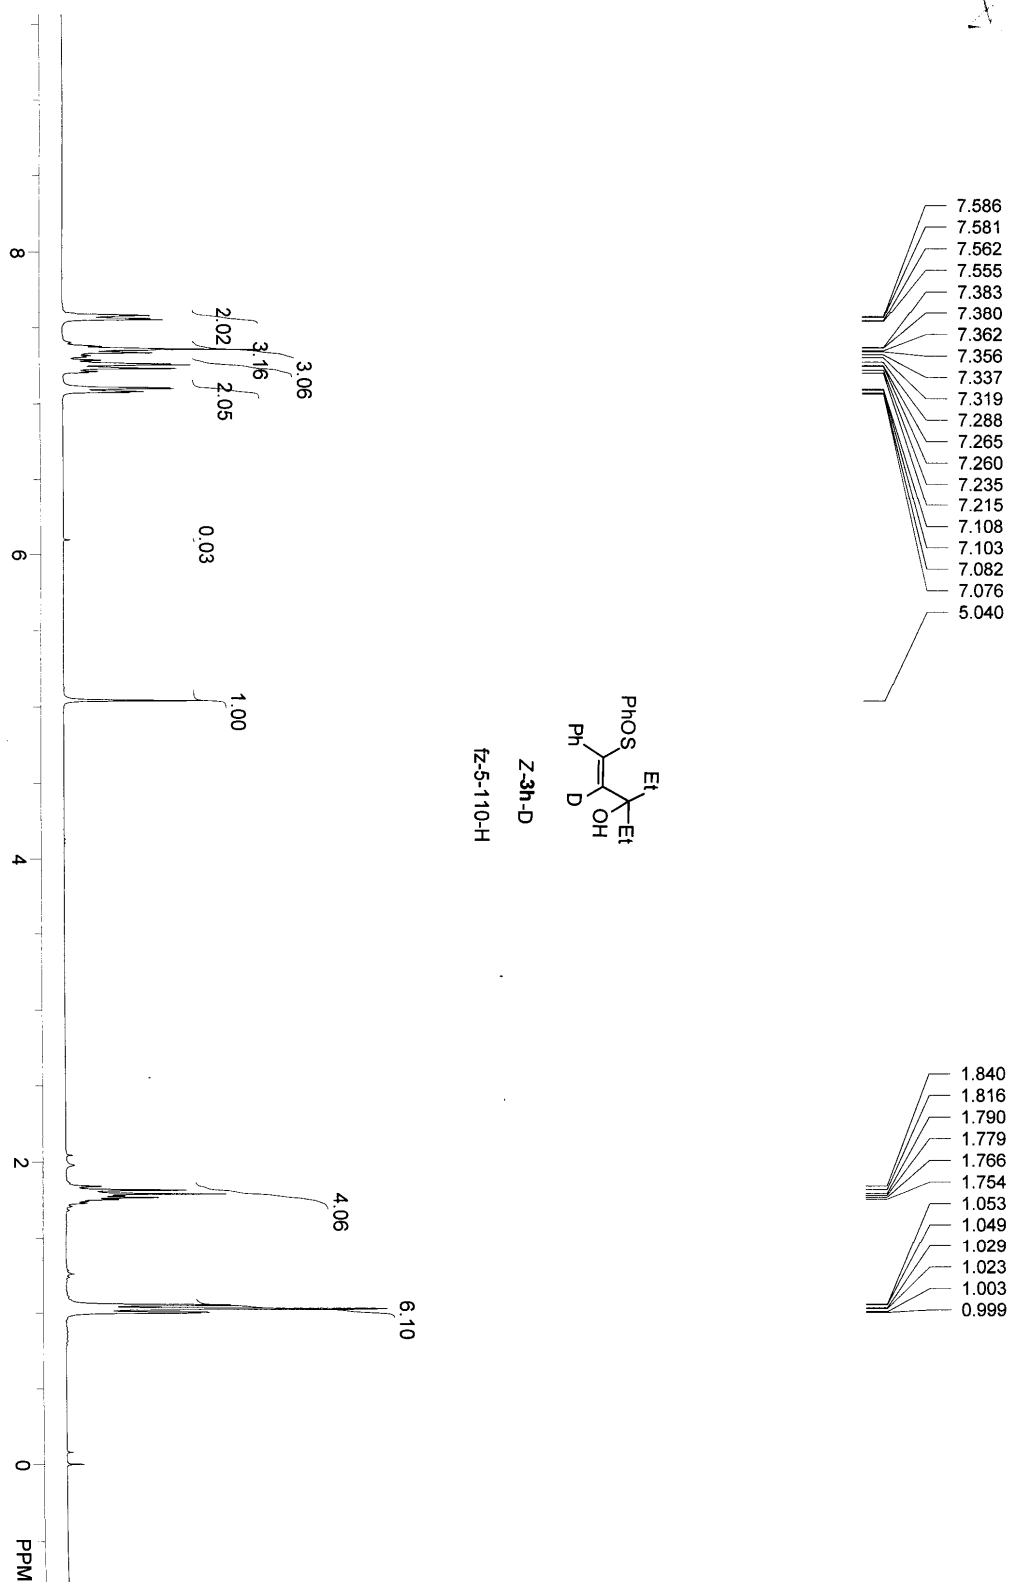

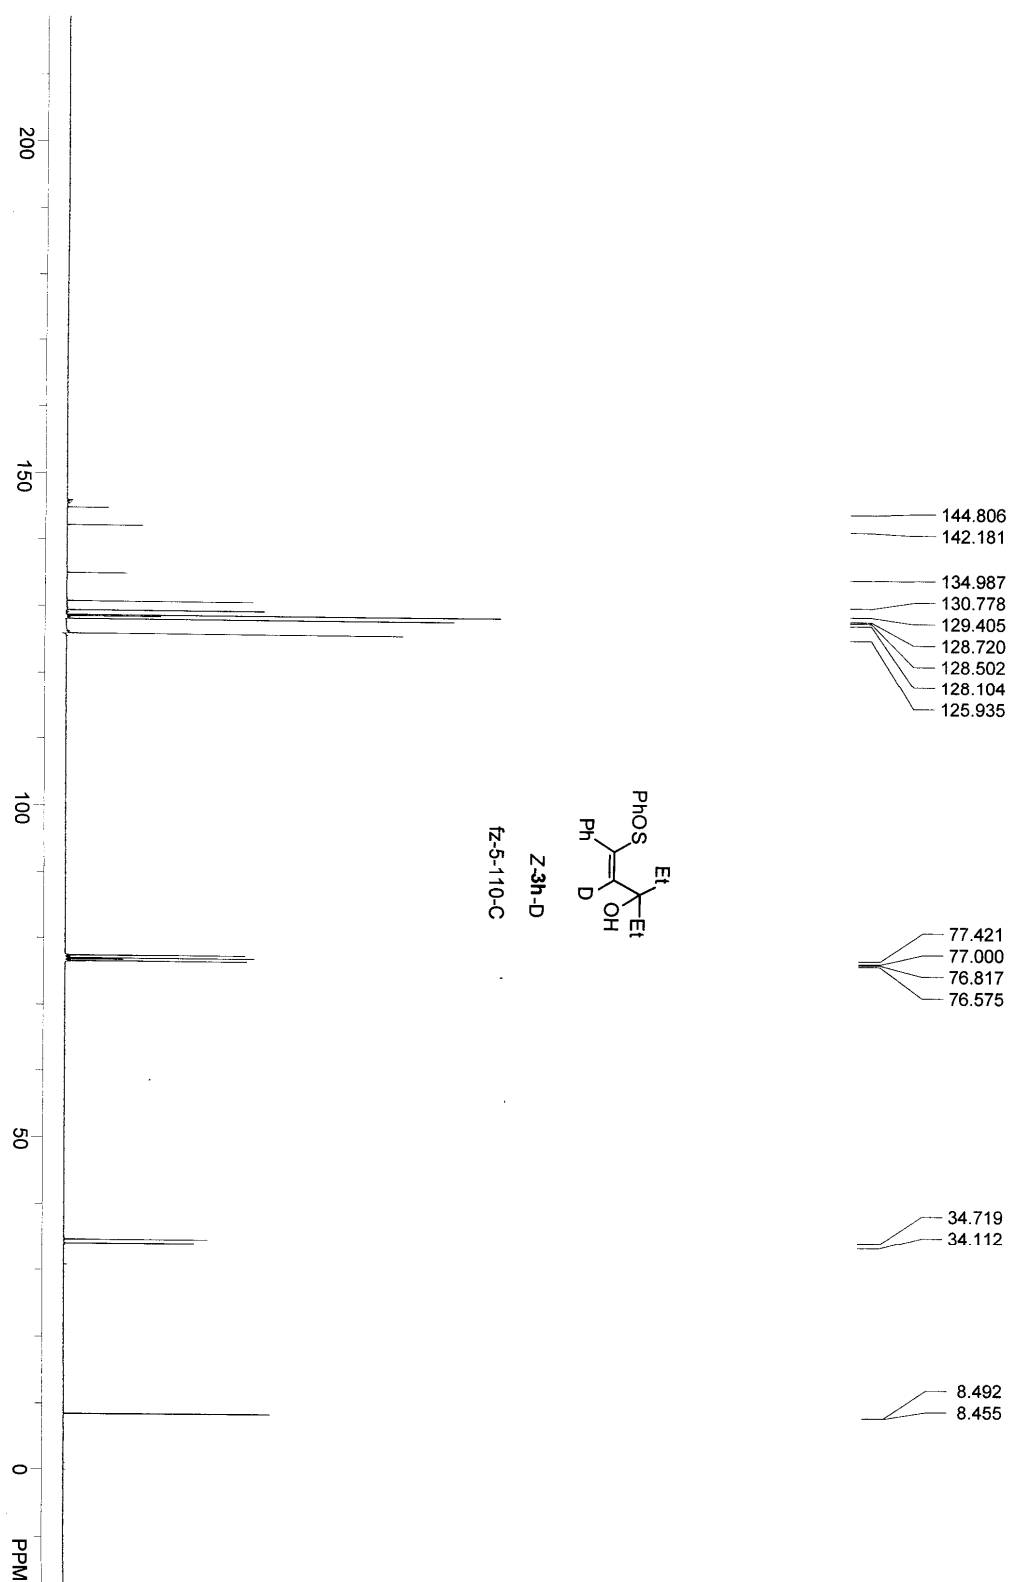

Supplement: c0ob00007h.pdf [file c0ob00007h.pdf]
